# Supplementary material for: Secretome Analysis for a New Strain of the Blackleg Fungus Plenodomus lingam Reveals Candidate Proteins for Effectors and Virulence Factors
Source: MDPI journal article supplement (doi:10.3390/jof9070740), 2023-07-11
Supplement: s1 [file s1]

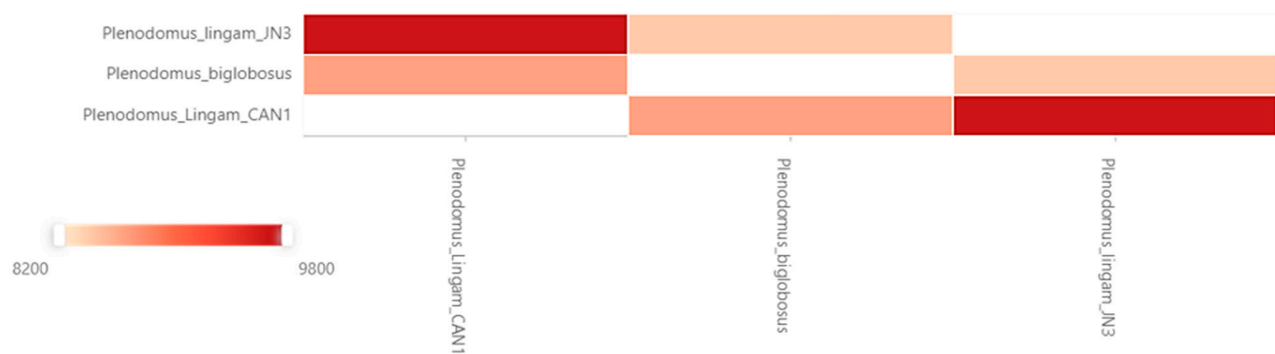

Figure S1: Pairwise heatmap showing the relationship between the species after the clustering orthologue analysis.
