# Supplementary material for: Secretome Analysis for a New Strain of the Blackleg Fungus Plenodomus lingam Reveals Candidate Proteins for Effectors and Virulence Factors
Source: J Fungi (Basel). 2023 Jul 11;9(7):740. doi: 10.3390/jof9070740 (PMC10381368; doi:10.3390/jof9070740)
Supplement: Supplementary file 1 [file jof-09-00740-s001.zip]

Archive with 8 entries (8 files):
- Figure S1.pdf
- Table S1.csv
- Table S2.xlsx
- Table S3.xlsx
- Table S4.xlsx
- Table S5.xlsx
- Table S6.xlsx
- Table S7.xlsx
