# Supplementary material for: Secretome Analysis for a New Strain of the Blackleg Fungus Plenodomus lingam Reveals Candidate Proteins for Effectors and Virulence Factors
Source: J Fungi (Basel). 2023 Jul 11;9(7):740. doi: 10.3390/jof9070740 (PMC10381368; doi:10.3390/jof9070740)
Supplement: Supplementary file 1 [file jof-09-00740-s001.zip › Table S1.csv]

#Name	Accession	Start	Stop	Strand	GeneID	Locus	Locus tag	Protein product	Length	Protein Name
Un	JACTNS010000001.1	33690	34004	+			IAQ61_000001	KAH9881279.1	71	hypothetical protein IAQ61_000001
Un	JACTNS010000001.1	36765	37613	-			IAQ61_000002	KAH9881280.1	256	hypothetical protein IAQ61_000002
Un	JACTNS010000001.1	38414	39777	-			IAQ61_000003	KAH9881281.1	432	hypothetical protein IAQ61_000003, partial
Un	JACTNS010000001.1	40475	43126	+			IAQ61_000004	KAH9881282.1	883	hypothetical protein IAQ61_000004
Un	JACTNS010000001.1	43470	43697	-			IAQ61_000005	KAH9881283.1	75	hypothetical protein IAQ61_000005
Un	JACTNS010000001.1	48410	50186	-			IAQ61_000006	KAH9881284.1	503	hypothetical protein IAQ61_000006
Un	JACTNS010000001.1	53973	55478	-			IAQ61_000007	KAH9881285.1	501	hypothetical protein IAQ61_000007
Un	JACTNS010000001.1	83698	84840	+			IAQ61_000008	KAH9881286.1	380	hypothetical protein IAQ61_000008
Un	JACTNS010000001.1	85087	85287	-			IAQ61_000009	KAH9881287.1	66	hypothetical protein IAQ61_000009
Un	JACTNS010000001.1	85919	87268	+			IAQ61_000010	KAH9881288.1	449	hypothetical protein IAQ61_000010
Un	JACTNS010000001.1	87615	90212	-			IAQ61_000011	KAH9881289.1	712	hypothetical protein IAQ61_000011
Un	JACTNS010000001.1	90833	91361	-			IAQ61_000012	KAH9881290.1	170	hypothetical protein IAQ61_000012, partial
Un	JACTNS010000001.1	91739	92315	-			IAQ61_000013	KAH9881291.1	125	hypothetical protein IAQ61_000013
Un	JACTNS010000001.1	94468	96095	-			IAQ61_000014	KAH9881292.1	525	hypothetical protein IAQ61_000014
Un	JACTNS010000001.1	96765	97780	-			IAQ61_000015	KAH9881293.1	321	hypothetical protein IAQ61_000015, partial
Un	JACTNS010000001.1	98037	100820	+			IAQ61_000016	KAH9881294.1	927	hypothetical protein IAQ61_000016
Un	JACTNS010000001.1	101460	102575	-			IAQ61_000017	KAH9881295.1	371	hypothetical protein IAQ61_000017
Un	JACTNS010000001.1	103270	103599	-			IAQ61_000018	KAH9881296.1	83	hypothetical protein IAQ61_000018
Un	JACTNS010000001.1	103768	106408	+			IAQ61_000019	KAH9881297.1	827	hypothetical protein IAQ61_000019
Un	JACTNS010000001.1	108068	109600	-			IAQ61_000020	KAH9881298.1	510	hypothetical protein IAQ61_000020
Un	JACTNS010000001.1	112486	113010	-			IAQ61_000021	KAH9881299.1	174	hypothetical protein IAQ61_000021
Un	JACTNS010000001.1	114432	116453	-			IAQ61_000023	KAH9881300.1	576	hypothetical protein IAQ61_000023
Un	JACTNS010000001.1	116520	116828	+			IAQ61_000024	KAH9881301.1	102	hypothetical protein IAQ61_000024
Un	JACTNS010000001.1	127811	128690	+			IAQ61_000025	KAH9881302.1	244	hypothetical protein IAQ61_000025
Un	JACTNS010000001.1	129399	130913	-			IAQ61_000026	KAH9881303.1	358	hypothetical protein IAQ61_000026
Un	JACTNS010000001.1	132120	132613	-			IAQ61_000027	KAH9881304.1	147	hypothetical protein IAQ61_000027
Un	JACTNS010000001.1	133358	135513	+		GTR1	IAQ61_000028	KAH9881305.1	550	GTP-binding protein gtr1
Un	JACTNS010000001.1	136844	138075	-			IAQ61_000029	KAH9881306.1	297	hypothetical protein IAQ61_000029, partial
Un	JACTNS010000001.1	138570	138959	+			IAQ61_000030	KAH9881307.1	129	hypothetical protein IAQ61_000030
Un	JACTNS010000001.1	139558	142638	-			IAQ61_000031	KAH9881308.1	888	hypothetical protein IAQ61_000031
Un	JACTNS010000001.1	145268	147337	-			IAQ61_000032	KAH9881309.1	689	hypothetical protein IAQ61_000032
Un	JACTNS010000001.1	147885	148064	-			IAQ61_000033	KAH9881310.1	59	hypothetical protein IAQ61_000033
Un	JACTNS010000001.1	148352	148721	-			IAQ61_000034	KAH9881311.1	107	hypothetical protein IAQ61_000034, partial
Un	JACTNS010000001.1	152045	152842	-			IAQ61_000035	KAH9881312.1	115	hypothetical protein IAQ61_000035, partial
Un	JACTNS010000001.1	155186	157381	-			IAQ61_000036	KAH9881313.1	691	hypothetical protein IAQ61_000036
Un	JACTNS010000001.1	161122	161579	-			IAQ61_000037	KAH9881314.1	119	hypothetical protein IAQ61_000037
Un	JACTNS010000001.1	164578	165867	+			IAQ61_000038	KAH9881315.1	429	hypothetical protein IAQ61_000038
Un	JACTNS010000001.1	166427	167409	-			IAQ61_000039	KAH9881316.1	260	hypothetical protein IAQ61_000039
Un	JACTNS010000001.1	168012	168998	+			IAQ61_000040	KAH9881317.1	328	hypothetical protein IAQ61_000040
Un	JACTNS010000001.1	169649	171856	-			IAQ61_000041	KAH9881318.1	679	hypothetical protein IAQ61_000041
Un	JACTNS010000001.1	173182	174943	-		CKI1	IAQ61_000042	KAH9881319.1	449	bifunctional choline kinase/ethanolamine kinase cki1
Un	JACTNS010000001.1	177580	181851	-			IAQ61_000043	KAH9881320.1	1367	hypothetical protein IAQ61_000043
Un	JACTNS010000001.1	182667	184096	-			IAQ61_000044	KAH9881321.1	187	hypothetical protein IAQ61_000044
Un	JACTNS010000001.1	184831	185855	+		DRE2	IAQ61_000045	KAH9881322.1	319	electron carrier
Un	JACTNS010000001.1	186397	187776	-			IAQ61_000046	KAH9881323.1	459	hypothetical protein IAQ61_000046
Un	JACTNS010000001.1	187799	190432	-			IAQ61_000047	KAH9881324.1	877	hypothetical protein IAQ61_000047
Un	JACTNS010000001.1	190896	191402	-			IAQ61_000048	KAH9881325.1	168	hypothetical protein IAQ61_000048
Un	JACTNS010000001.1	191814	193422	+			IAQ61_000049	KAH9881326.1	502	hypothetical protein IAQ61_000049
Un	JACTNS010000001.1	193799	195138	-			IAQ61_000050	KAH9881327.1	411	hypothetical protein IAQ61_000050
Un	JACTNS010000001.1	195914	197146	+			IAQ61_000051	KAH9881328.1	291	hypothetical protein IAQ61_000051
Un	JACTNS010000001.1	198054	200211	+		ASN2	IAQ61_000052	KAH9881329.1	579	Asparagine synthetase
Un	JACTNS010000001.1	200624	201625	-			IAQ61_000053	KAH9881330.1	333	hypothetical protein IAQ61_000053
Un	JACTNS010000001.1	203086	203955	-			IAQ61_000054	KAH9881331.1	289	hypothetical protein IAQ61_000054
Un	JACTNS010000001.1	205426	206527	+			IAQ61_000055	KAH9881332.1	303	hypothetical protein IAQ61_000055
Un	JACTNS010000001.1	207162	208517	+			IAQ61_000056	KAH9881333.1	451	hypothetical protein IAQ61_000056
Un	JACTNS010000001.1	209990	211372	-			IAQ61_000058	KAH9881334.1	460	hypothetical protein IAQ61_000058
Un	JACTNS010000001.1	212018	213989	+			IAQ61_000059	KAH9881335.1	636	hypothetical protein IAQ61_000059
Un	JACTNS010000001.1	214231	215790	-			IAQ61_000060	KAH9881336.1	375	hypothetical protein IAQ61_000060
Un	JACTNS010000001.1	215983	216698	+			IAQ61_000061	KAH9881337.1	187	hypothetical protein IAQ61_000061
Un	JACTNS010000001.1	217048	217749	-			IAQ61_000062	KAH9881338.1	233	hypothetical protein IAQ61_000062
Un	JACTNS010000001.1	221399	223760	-			IAQ61_000063	KAH9881339.1	639	hypothetical protein IAQ61_000063
Un	JACTNS010000001.1	227490	228548	+			IAQ61_000064	KAH9881340.1	203	hypothetical protein IAQ61_000064
Un	JACTNS010000001.1	228839	229171	+			IAQ61_000065	KAH9881341.1	110	hypothetical protein IAQ61_000065
Un	JACTNS010000001.1	231129	232103	-			IAQ61_000066	KAH9881342.1	179	hypothetical protein IAQ61_000066, partial
Un	JACTNS010000001.1	233161	233522	-		RPL31	IAQ61_000067	KAH9881343.1	94	60S ribosomal protein L31
Un	JACTNS010000001.1	233980	234345	-			IAQ61_000068	KAH9881344.1	121	hypothetical protein IAQ61_000068
Un	JACTNS010000001.1	234456	236388	-			IAQ61_000069	KAH9881345.1	605	hypothetical protein IAQ61_000069
Un	JACTNS010000001.1	237126	240701	-			IAQ61_000070	KAH9881346.1	1057	hypothetical protein IAQ61_000070
Un	JACTNS010000001.1	242496	246111	-		XPO1	IAQ61_000071	KAH9881347.1	1069	Exportin-1
Un	JACTNS010000001.1	247274	247459	-			IAQ61_000072	KAH9881348.1	61	hypothetical protein IAQ61_000072
Un	JACTNS010000001.1	247589	250176	+		SEC23	IAQ61_000073	KAH9881349.1	776	GTPase-activating protein S23
Un	JACTNS010000001.1	250320	250816	+			IAQ61_000074	KAH9881350.1	70	hypothetical protein IAQ61_000074
Un	JACTNS010000001.1	251382	251630	-			IAQ61_000075	KAH9881351.1	82	hypothetical protein IAQ61_000075
Un	JACTNS010000001.1	254973	256605	-			IAQ61_000076	KAH9881352.1	525	hypothetical protein IAQ61_000076
Un	JACTNS010000001.1	257519	258429	-			IAQ61_000077	KAH9881353.1	214	hypothetical protein IAQ61_000077
Un	JACTNS010000001.1	260548	262606	-			IAQ61_000078	KAH9881354.1	522	hypothetical protein IAQ61_000078
Un	JACTNS010000001.1	263202	264077	-			IAQ61_000079	KAH9881355.1	275	hypothetical protein IAQ61_000079
Un	JACTNS010000001.1	265023	265446	+			IAQ61_000080	KAH9881356.1	119	hypothetical protein IAQ61_000080
Un	JACTNS010000001.1	266616	266837	+			IAQ61_000081	KAH9881357.1	73	hypothetical protein IAQ61_000081
Un	JACTNS010000001.1	267996	268880	-			IAQ61_000082	KAH9881358.1	294	hypothetical protein IAQ61_000082
Un	JACTNS010000001.1	273306	276239	+			IAQ61_000083	KAH9881359.1	977	hypothetical protein IAQ61_000083
Un	JACTNS010000001.1	277078	277590	+			IAQ61_000084	KAH9881360.1	61	hypothetical protein IAQ61_000084
Un	JACTNS010000001.1	278266	279137	-			IAQ61_000085	KAH9881361.1	254	hypothetical protein IAQ61_000085
Un	JACTNS010000001.1	279985	280778	-			IAQ61_000086	KAH9881362.1	179	hypothetical protein IAQ61_000086
Un	JACTNS010000001.1	281222	282908	+			IAQ61_000087	KAH9881363.1	534	hypothetical protein IAQ61_000087
Un	JACTNS010000001.1	284345	285244	-			IAQ61_000088	KAH9881364.1	233	hypothetical protein IAQ61_000088
Un	JACTNS010000001.1	285609	286365	+			IAQ61_000089	KAH9881365.1	176	hypothetical protein IAQ61_000089
Un	JACTNS010000001.1	286753	288990	+			IAQ61_000090	KAH9881366.1	745	hypothetical protein IAQ61_000090
Un	JACTNS010000001.1	289074	290258	-			IAQ61_000091	KAH9881367.1	364	hypothetical protein IAQ61_000091
Un	JACTNS010000001.1	290565	290813	-			IAQ61_000092	KAH9881368.1	82	hypothetical protein IAQ61_000092
Un	JACTNS010000001.1	291000	293787	+			IAQ61_000093	KAH9881369.1	886	hypothetical protein IAQ61_000093
Un	JACTNS010000001.1	294487	294802	+			IAQ61_000094	KAH9881370.1	76	hypothetical protein IAQ61_000094
Un	JACTNS010000001.1	294958	297326	+			IAQ61_000095	KAH9881371.1	750	hypothetical protein IAQ61_000095
Un	JACTNS010000001.1	302054	302262	-			IAQ61_000096	KAH9881372.1	47	hypothetical protein IAQ61_000096, partial
Un	JACTNS010000001.1	302667	305090	+			IAQ61_000097	KAH9881373.1	791	hypothetical protein IAQ61_000097
Un	JACTNS010000001.1	306506	309446	+			IAQ61_000098	KAH9881374.1	811	hypothetical protein IAQ61_000098
Un	JACTNS010000001.1	310753	311126	-			IAQ61_000099	KAH9881375.1	85	hypothetical protein IAQ61_000099
Un	JACTNS010000001.1	311294	311912	+			IAQ61_000100	KAH9881376.1	165	hypothetical protein IAQ61_000100
Un	JACTNS010000001.1	312471	313788	+			IAQ61_000101	KAH9881377.1	334	hypothetical protein IAQ61_000101
Un	JACTNS010000001.1	313912	314635	-			IAQ61_000102	KAH9881378.1	140	hypothetical protein IAQ61_000102
Un	JACTNS010000001.1	314958	317183	-			IAQ61_000103	KAH9881379.1	741	hypothetical protein IAQ61_000103
Un	JACTNS010000001.1	317703	320105	-		MET26	IAQ61_000104	KAH9881380.1	766	homocysteine methyltransferase Met26
Un	JACTNS010000001.1	321606	322560	+			IAQ61_000105	KAH9881381.1	302	hypothetical protein IAQ61_000105
Un	JACTNS010000001.1	323665	327027	+			IAQ61_000106	KAH9881382.1	1120	hypothetical protein IAQ61_000106
Un	JACTNS010000001.1	366770	367861	+			IAQ61_000107	KAH9881383.1	363	hypothetical protein IAQ61_000107
Un	JACTNS010000001.1	368192	371571	+			IAQ61_000108	KAH9881384.1	1089	hypothetical protein IAQ61_000108
Un	JACTNS010000001.1	429925	431280	+			IAQ61_000109	KAH9881385.1	358	hypothetical protein IAQ61_000109
Un	JACTNS010000001.1	434770	435977	-		HEM2	IAQ61_000110	KAH9881386.1	376	Aminolevulinate dehydratase
Un	JACTNS010000001.1	437135	437943	+			IAQ61_000111	KAH9881387.1	142	hypothetical protein IAQ61_000111
Un	JACTNS010000001.1	438480	440221	-			IAQ61_000112	KAH9881388.1	526	hypothetical protein IAQ61_000112, partial
Un	JACTNS010000001.1	440483	441928	+			IAQ61_000113	KAH9881389.1	447	hypothetical protein IAQ61_000113
Un	JACTNS010000001.1	442288	443622	+		CIA1	IAQ61_000114	KAH9881390.1	444	Cytosolic iron-sulfur protein assembly protein
Un	JACTNS010000001.1	444232	445336	+			IAQ61_000115	KAH9881391.1	333	hypothetical protein IAQ61_000115
Un	JACTNS010000001.1	445666	447735	-			IAQ61_000116	KAH9881392.1	673	hypothetical protein IAQ61_000116
Un	JACTNS010000001.1	448420	448719	-			IAQ61_000117	KAH9881393.1	99	hypothetical protein IAQ61_000117
Un	JACTNS010000001.1	451046	452518	-			IAQ61_000118	KAH9881394.1	454	hypothetical protein IAQ61_000118
Un	JACTNS010000001.1	453354	455061	-			IAQ61_000119	KAH9881395.1	534	hypothetical protein IAQ61_000119
Un	JACTNS010000001.1	456117	457169	+			IAQ61_000120	KAH9881396.1	350	hypothetical protein IAQ61_000120
Un	JACTNS010000001.1	457566	458611	+			IAQ61_000121	KAH9881397.1	316	hypothetical protein IAQ61_000121
Un	JACTNS010000001.1	458735	459822	-			IAQ61_000122	KAH9881398.1	331	hypothetical protein IAQ61_000122
Un	JACTNS010000001.1	461434	463598	-			IAQ61_000123	KAH9881399.1	639	hypothetical protein IAQ61_000123
Un	JACTNS010000001.1	464125	464849	-			IAQ61_000124	KAH9881400.1	185	hypothetical protein IAQ61_000124
Un	JACTNS010000001.1	465766	466100	-			IAQ61_000125	KAH9881401.1	92	hypothetical protein IAQ61_000125
Un	JACTNS010000001.1	467605	467949	-			IAQ61_000126	KAH9881402.1	114	hypothetical protein IAQ61_000126
Un	JACTNS010000001.1	470582	471061	-			IAQ61_000127	KAH9881403.1	159	hypothetical protein IAQ61_000127
Un	JACTNS010000001.1	471248	473152	+			IAQ61_000128	KAH9881404.1	559	hypothetical protein IAQ61_000128
Un	JACTNS010000001.1	474613	475096	+			IAQ61_000129	KAH9881405.1	143	hypothetical protein IAQ61_000129
Un	JACTNS010000001.1	475735	476051	-			IAQ61_000130	KAH9881406.1	76	hypothetical protein IAQ61_000130
Un	JACTNS010000001.1	476130	477166	-			IAQ61_000131	KAH9881407.1	256	hypothetical protein IAQ61_000131
Un	JACTNS010000001.1	478149	478764	-			IAQ61_000132	KAH9881408.1	180	hypothetical protein IAQ61_000132
Un	JACTNS010000001.1	479866	482446	+			IAQ61_000133	KAH9881409.1	823	hypothetical protein IAQ61_000133
Un	JACTNS010000001.1	482840	486328	+			IAQ61_000134	KAH9881410.1	795	hypothetical protein IAQ61_000134
Un	JACTNS010000001.1	488617	489289	+			IAQ61_000136	KAH9881411.1	205	hypothetical protein IAQ61_000136
Un	JACTNS010000001.1	490046	490309	-			IAQ61_000137	KAH9881412.1	87	hypothetical protein IAQ61_000137
Un	JACTNS010000001.1	490598	491383	-		GET1	IAQ61_000138	KAH9881413.1	216	GET complex subunit get1
Un	JACTNS010000001.1	491599	492639	+			IAQ61_000139	KAH9881414.1	346	hypothetical protein IAQ61_000139
Un	JACTNS010000001.1	494407	497170	+			IAQ61_000140	KAH9881415.1	894	hypothetical protein IAQ61_000140
Un	JACTNS010000001.1	499400	500562	-			IAQ61_000141	KAH9881416.1	333	hypothetical protein IAQ61_000141
Un	JACTNS010000001.1	502717	503189	-		VTC1	IAQ61_000142	KAH9881417.1	127	vacuolar transporter chaperone
Un	JACTNS010000001.1	503840	504414	+			IAQ61_000143	KAH9881418.1	155	hypothetical protein IAQ61_000143
Un	JACTNS010000001.1	505253	506466	-			IAQ61_000144	KAH9881419.1	283	hypothetical protein IAQ61_000144
Un	JACTNS010000001.1	507882	509417	+			IAQ61_000145	KAH9881420.1	511	hypothetical protein IAQ61_000145
Un	JACTNS010000001.1	509693	510046	-			IAQ61_000146	KAH9881421.1	117	hypothetical protein IAQ61_000146
Un	JACTNS010000001.1	510810	511215	-			IAQ61_000147	KAH9881422.1	110	hypothetical protein IAQ61_000147
Un	JACTNS010000001.1	511701	512111	-			IAQ61_000148	KAH9881423.1	91	hypothetical protein IAQ61_000148
Un	JACTNS010000001.1	513223	515623	-			IAQ61_000149	KAH9881424.1	752	hypothetical protein IAQ61_000149
Un	JACTNS010000001.1	515941	516541	+			IAQ61_000150	KAH9881425.1	138	hypothetical protein IAQ61_000150
Un	JACTNS010000001.1	517145	517697	-			IAQ61_000151	KAH9881426.1	164	hypothetical protein IAQ61_000151
Un	JACTNS010000001.1	521298	523412	+			IAQ61_000152	KAH9881427.1	686	hypothetical protein IAQ61_000152
Un	JACTNS010000001.1	525184	526293	+			IAQ61_000153	KAH9881428.1	325	hypothetical protein IAQ61_000153
Un	JACTNS010000001.1	526545	527500	-			IAQ61_000154	KAH9881429.1	295	hypothetical protein IAQ61_000154
Un	JACTNS010000001.1	528377	529916	-			IAQ61_000155	KAH9881430.1	487	hypothetical protein IAQ61_000155
Un	JACTNS010000001.1	530804	532676	-			IAQ61_000156	KAH9881431.1	555	hypothetical protein IAQ61_000156
Un	JACTNS010000001.1	532876	533753	+		PSF2	IAQ61_000157	KAH9881432.1	241	DNA replication protein psf2
Un	JACTNS010000001.1	536733	537074	+			IAQ61_000158	KAH9881433.1	113	hypothetical protein IAQ61_000158
Un	JACTNS010000001.1	537993	538415	+			IAQ61_000159	KAH9881434.1	140	hypothetical protein IAQ61_000159
Un	JACTNS010000001.1	539240	540058	-			IAQ61_000160	KAH9881435.1	199	hypothetical protein IAQ61_000160
Un	JACTNS010000001.1	544178	547977	+			IAQ61_000161	KAH9881436.1	1248	hypothetical protein IAQ61_000161
Un	JACTNS010000001.1	550168	550961	-			IAQ61_000162	KAH9881437.1	247	hypothetical protein IAQ61_000162
Un	JACTNS010000001.1	551564	554484	-			IAQ61_000163	KAH9881438.1	889	hypothetical protein IAQ61_000163
Un	JACTNS010000001.1	556566	557929	-		ARO2	IAQ61_000164	KAH9881439.1	410	bifunctional chorismate synthase/riboflavin reductase
Un	JACTNS010000001.1	558107	558493	+			IAQ61_000165	KAH9881440.1	128	hypothetical protein IAQ61_000165
Un	JACTNS010000001.1	559076	560446	+			IAQ61_000166	KAH9881441.1	297	hypothetical protein IAQ61_000166
Un	JACTNS010000001.1	560696	561547	-			IAQ61_000167	KAH9881442.1	283	hypothetical protein IAQ61_000167
Un	JACTNS010000001.1	561902	563437	+			IAQ61_000168	KAH9881443.1	451	hypothetical protein IAQ61_000168
Un	JACTNS010000001.1	564449	566999	-			IAQ61_000169	KAH9881444.1	833	hypothetical protein IAQ61_000169
Un	JACTNS010000001.1	567897	569995	-			IAQ61_000170	KAH9881445.1	683	hypothetical protein IAQ61_000170
Un	JACTNS010000001.1	570082	572100	+			IAQ61_000171	KAH9881446.1	640	hypothetical protein IAQ61_000171, partial
Un	JACTNS010000001.1	572656	573330	+			IAQ61_000172	KAH9881447.1	184	hypothetical protein IAQ61_000172
Un	JACTNS010000001.1	574036	575609	+			IAQ61_000173	KAH9881448.1	444	hypothetical protein IAQ61_000173
Un	JACTNS010000001.1	578418	580333	-			IAQ61_000174	KAH9881449.1	572	hypothetical protein IAQ61_000174, partial
Un	JACTNS010000001.1	581101	584843	-			IAQ61_000175	KAH9881450.1	1074	hypothetical protein IAQ61_000175
Un	JACTNS010000001.1	586903	590123	+			IAQ61_000176	KAH9881451.1	1009	hypothetical protein IAQ61_000176
Un	JACTNS010000001.1	590178	590813	+			IAQ61_000177	KAH9881452.1	211	hypothetical protein IAQ61_000177
Un	JACTNS010000001.1	591893	593058	-			IAQ61_000178	KAH9881453.1	328	hypothetical protein IAQ61_000178
Un	JACTNS010000001.1	594104	595882	-		PTC2	IAQ61_000179	KAH9881454.1	444	Protein phosphatase 2C 2
Un	JACTNS010000001.1	597676	599810	+			IAQ61_000180	KAH9881455.1	694	hypothetical protein IAQ61_000180
Un	JACTNS010000001.1	601245	602694	+			IAQ61_000181	KAH9881456.1	447	hypothetical protein IAQ61_000181
Un	JACTNS010000001.1	603407	605581	+			IAQ61_000182	KAH9881457.1	724	hypothetical protein IAQ61_000182
Un	JACTNS010000001.1	607429	608711	+			IAQ61_000183	KAH9881458.1	362	hypothetical protein IAQ61_000183
Un	JACTNS010000001.1	609595	611211	+			IAQ61_000184	KAH9881459.1	479	hypothetical protein IAQ61_000184
Un	JACTNS010000001.1	612684	613163	+			IAQ61_000185	KAH9881460.1	159	hypothetical protein IAQ61_000185
Un	JACTNS010000001.1	613669	614556	-			IAQ61_000186	KAH9881461.1	295	hypothetical protein IAQ61_000186
Un	JACTNS010000001.1	615948	618149	-			IAQ61_000187	KAH9881462.1	593	hypothetical protein IAQ61_000187
Un	JACTNS010000001.1	619275	620486	-		SPN2	IAQ61_000188	KAH9881463.1	341	Septin Spn2
Un	JACTNS010000001.1	620938	621533	+			IAQ61_000189	KAH9881464.1	180	hypothetical protein IAQ61_000189
Un	JACTNS010000001.1	621869	622495	-			IAQ61_000190	KAH9881465.1	208	hypothetical protein IAQ61_000190
Un	JACTNS010000001.1	623134	626164	+		RAR1	IAQ61_000191	KAH9881466.1	815	putative methionine--tRNA ligase, cytoplasmic protein rar1, partial
Un	JACTNS010000001.1	626273	627450	-			IAQ61_000192	KAH9881467.1	101	hypothetical protein IAQ61_000192
Un	JACTNS010000001.1	628659	630138	+			IAQ61_000193	KAH9881468.1	477	hypothetical protein IAQ61_000193
Un	JACTNS010000001.1	630818	631706	-			IAQ61_000194	KAH9881469.1	215	hypothetical protein IAQ61_000194, partial
Un	JACTNS010000001.1	632583	633143	+			IAQ61_000195	KAH9881470.1	186	hypothetical protein IAQ61_000195
Un	JACTNS010000001.1	633987	635364	+			IAQ61_000196	KAH9881471.1	442	hypothetical protein IAQ61_000196
Un	JACTNS010000001.1	636247	637877	+			IAQ61_000197	KAH9881472.1	523	hypothetical protein IAQ61_000197
Un	JACTNS010000001.1	638811	641518	+			IAQ61_000198	KAH9881473.1	836	hypothetical protein IAQ61_000198
Un	JACTNS010000001.1	642639	644951	-			IAQ61_000199	KAH9881474.1	589	hypothetical protein IAQ61_000199
Un	JACTNS010000001.1	645445	646440	+			IAQ61_000200	KAH9881475.1	294	hypothetical protein IAQ61_000200
Un	JACTNS010000001.1	648205	653172	+			IAQ61_000201	KAH9881476.1	1555	hypothetical protein IAQ61_000201
Un	JACTNS010000001.1	653536	654093	-			IAQ61_000202	KAH9881477.1	185	hypothetical protein IAQ61_000202
Un	JACTNS010000001.1	654967	657151	+			IAQ61_000203	KAH9881478.1	669	hypothetical protein IAQ61_000203
Un	JACTNS010000001.1	657628	659937	+			IAQ61_000204	KAH9881479.1	769	hypothetical protein IAQ61_000204
Un	JACTNS010000001.1	660395	663246	-			IAQ61_000205	KAH9881480.1	934	hypothetical protein IAQ61_000205
Un	JACTNS010000001.1	663977	665206	-			IAQ61_000206	KAH9881481.1	315	hypothetical protein IAQ61_000206
Un	JACTNS010000001.1	665704	666423	+			IAQ61_000207	KAH9881482.1	203	hypothetical protein IAQ61_000207
Un	JACTNS010000001.1	667003	667233	-			IAQ61_000208	KAH9881483.1	76	hypothetical protein IAQ61_000208
Un	JACTNS010000001.1	667718	668954	+			IAQ61_000209	KAH9881484.1	363	hypothetical protein IAQ61_000209
Un	JACTNS010000001.1	669936	670295	+			IAQ61_000210	KAH9881485.1	119	hypothetical protein IAQ61_000210
Un	JACTNS010000001.1	670428	672508	-			IAQ61_000211	KAH9881486.1	625	hypothetical protein IAQ61_000211
Un	JACTNS010000001.1	673078	675113	-		KEX1	IAQ61_000212	KAH9881487.1	641	Cell death protease
Un	JACTNS010000001.1	676214	677073	-			IAQ61_000213	KAH9881488.1	203	hypothetical protein IAQ61_000213
Un	JACTNS010000001.1	678966	679532	+			IAQ61_000214	KAH9881489.1	188	hypothetical protein IAQ61_000214
Un	JACTNS010000001.1	681354	684092	+			IAQ61_000215	KAH9881490.1	797	hypothetical protein IAQ61_000215, partial
Un	JACTNS010000001.1	684832	685458	-			IAQ61_000216	KAH9881491.1	208	hypothetical protein IAQ61_000216
Un	JACTNS010000001.1	685542	685933	-			IAQ61_000217	KAH9881492.1	113	hypothetical protein IAQ61_000217
Un	JACTNS010000001.1	686862	687080	+			IAQ61_000218	KAH9881493.1	72	hypothetical protein IAQ61_000218
Un	JACTNS010000001.1	687556	688292	+			IAQ61_000219	KAH9881494.1	227	hypothetical protein IAQ61_000219
Un	JACTNS010000001.1	688417	689549	-			IAQ61_000220	KAH9881495.1	349	hypothetical protein IAQ61_000220, partial
Un	JACTNS010000001.1	690078	690726	+		HUS5	IAQ61_000221	KAH9881496.1	157	SUMO conjugating enzyme Hus5
Un	JACTNS010000001.1	691591	692923	-			IAQ61_000222	KAH9881497.1	258	hypothetical protein IAQ61_000222
Un	JACTNS010000001.1	693322	693561	-			IAQ61_000223	KAH9881498.1	79	hypothetical protein IAQ61_000223
Un	JACTNS010000001.1	694460	695608	-			IAQ61_000224	KAH9881499.1	270	hypothetical protein IAQ61_000224, partial
Un	JACTNS010000001.1	695526	697852	+			IAQ61_000225	KAH9881500.1	424	hypothetical protein IAQ61_000225, partial
Un	JACTNS010000001.1	698488	699758	-			IAQ61_000226	KAH9881501.1	402	hypothetical protein IAQ61_000226
Un	JACTNS010000001.1	700477	701643	-		CEL6B	IAQ61_000227	KAH9881502.1	388	1,4-beta-D-glucan cellobiohydrolase cel6b
Un	JACTNS010000001.1	713126	713500	+			IAQ61_000228	KAH9881503.1	88	hypothetical protein IAQ61_000228
Un	JACTNS010000001.1	715976	716826	+			IAQ61_000229	KAH9881504.1	243	hypothetical protein IAQ61_000229
Un	JACTNS010000001.1	717664	718038	+			IAQ61_000230	KAH9881505.1	124	hypothetical protein IAQ61_000230
Un	JACTNS010000001.1	718068	719741	+			IAQ61_000231	KAH9881506.1	557	hypothetical protein IAQ61_000231
Un	JACTNS010000001.1	721063	722617	-			IAQ61_000233	KAH9881507.1	501	hypothetical protein IAQ61_000233
Un	JACTNS010000001.1	723890	726037	-			IAQ61_000234	KAH9881508.1	587	hypothetical protein IAQ61_000234
Un	JACTNS010000001.1	727546	729111	+			IAQ61_000235	KAH9881509.1	316	hypothetical protein IAQ61_000235
Un	JACTNS010000001.1	730049	732430	-			IAQ61_000236	KAH9881510.1	682	hypothetical protein IAQ61_000236
Un	JACTNS010000001.1	732712	732993	-			IAQ61_000237	KAH9881511.1	93	hypothetical protein IAQ61_000237
Un	JACTNS010000001.1	733448	735982	+			IAQ61_000238	KAH9881512.1	740	hypothetical protein IAQ61_000238
Un	JACTNS010000001.1	736565	736786	+			IAQ61_000239	KAH9881513.1	73	hypothetical protein IAQ61_000239
Un	JACTNS010000001.1	737869	739750	+		PHO5	IAQ61_000240	KAH9881514.1	571	acid phosphatase pho5
Un	JACTNS010000001.1	741121	742128	+			IAQ61_000241	KAH9881515.1	335	hypothetical protein IAQ61_000241
Un	JACTNS010000001.1	749648	750505	-		RSM25	IAQ61_000242	KAH9881516.1	260	mitochondrial ribosomal small subunit component
Un	JACTNS010000001.1	750849	752717	+			IAQ61_000243	KAH9881517.1	622	hypothetical protein IAQ61_000243
Un	JACTNS010000001.1	755078	756548	-			IAQ61_000244	KAH9881518.1	438	hypothetical protein IAQ61_000244
Un	JACTNS010000001.1	757194	758141	+			IAQ61_000245	KAH9881519.1	220	hypothetical protein IAQ61_000245
Un	JACTNS010000001.1	759313	761613	+			IAQ61_000246	KAH9881520.1	532	hypothetical protein IAQ61_000246, partial
Un	JACTNS010000001.1	763175	763724	+			IAQ61_000247	KAH9881521.1	79	hypothetical protein IAQ61_000247
Un	JACTNS010000001.1	764528	765456	+			IAQ61_000248	KAH9881522.1	265	hypothetical protein IAQ61_000248
Un	JACTNS010000001.1	766530	766748	-			IAQ61_000249	KAH9881523.1	72	hypothetical protein IAQ61_000249
Un	JACTNS010000001.1	767086	767352	-			IAQ61_000250	KAH9881524.1	88	hypothetical protein IAQ61_000250
Un	JACTNS010000001.1	768493	768717	+			IAQ61_000251	KAH9881525.1	74	hypothetical protein IAQ61_000251
Un	JACTNS010000001.1	768846	769666	+			IAQ61_000252	KAH9881526.1	237	hypothetical protein IAQ61_000252
Un	JACTNS010000001.1	771973	772380	+			IAQ61_000253	KAH9881527.1	135	hypothetical protein IAQ61_000253
Un	JACTNS010000001.1	773459	773989	-			IAQ61_000254	KAH9881528.1	154	hypothetical protein IAQ61_000254
Un	JACTNS010000001.1	774657	775759	-			IAQ61_000255	KAH9881529.1	317	hypothetical protein IAQ61_000255
Un	JACTNS010000001.1	777405	778467	-		STS1	IAQ61_000256	KAH9881530.1	309	Tethering factor for nuclear proteasome sts1
Un	JACTNS010000001.1	779496	783372	-		MTR4	IAQ61_000257	KAH9881531.1	1116	ATP-dependent RNA helicase mtr4, partial
Un	JACTNS010000001.1	783235	788315	+			IAQ61_000258	KAH9881532.1	1401	hypothetical protein IAQ61_000258
Un	JACTNS010000001.1	789204	790316	+			IAQ61_000259	KAH9881533.1	339	hypothetical protein IAQ61_000259
Un	JACTNS010000001.1	792906	793364	+			IAQ61_000260	KAH9881534.1	135	hypothetical protein IAQ61_000260
Un	JACTNS010000001.1	794314	795288	+			IAQ61_000261	KAH9881535.1	324	hypothetical protein IAQ61_000261
Un	JACTNS010000001.1	795655	796461	-			IAQ61_000262	KAH9881536.1	243	hypothetical protein IAQ61_000262
Un	JACTNS010000001.1	797402	798724	-			IAQ61_000263	KAH9881537.1	440	hypothetical protein IAQ61_000263
Un	JACTNS010000001.1	799299	800043	+			IAQ61_000264	KAH9881538.1	145	hypothetical protein IAQ61_000264
Un	JACTNS010000001.1	800684	801163	-			IAQ61_000265	KAH9881539.1	135	hypothetical protein IAQ61_000265
Un	JACTNS010000001.1	803813	805552	+			IAQ61_000266	KAH9881540.1	506	hypothetical protein IAQ61_000266
Un	JACTNS010000001.1	807588	807920	+			IAQ61_000267	KAH9881541.1	110	hypothetical protein IAQ61_000267
Un	JACTNS010000001.1	807925	809151	-			IAQ61_000268	KAH9881542.1	302	hypothetical protein IAQ61_000268, partial
Un	JACTNS010000001.1	810229	812595	+			IAQ61_000269	KAH9881543.1	727	hypothetical protein IAQ61_000269
Un	JACTNS010000001.1	813332	813916	+			IAQ61_000270	KAH9881544.1	152	hypothetical protein IAQ61_000270
Un	JACTNS010000001.1	814499	815491	+		ARD1_1	IAQ61_000271	KAH9881545.1	218	N-terminal acetyltransferase A complex catalytic subunit ard1
Un	JACTNS010000001.1	815908	817671	-			IAQ61_000272	KAH9881546.1	567	hypothetical protein IAQ61_000272
Un	JACTNS010000001.1	818882	820691	+			IAQ61_000273	KAH9881547.1	485	hypothetical protein IAQ61_000273
Un	JACTNS010000001.1	821910	823727	+			IAQ61_000274	KAH9881548.1	605	hypothetical protein IAQ61_000274
Un	JACTNS010000001.1	824517	825862	-			IAQ61_000275	KAH9881549.1	370	hypothetical protein IAQ61_000275, partial
Un	JACTNS010000001.1	826310	828612	-			IAQ61_000276	KAH9881550.1	682	hypothetical protein IAQ61_000276
Un	JACTNS010000001.1	832789	833136	+			IAQ61_000277	KAH9881551.1	115	hypothetical protein IAQ61_000277
Un	JACTNS010000001.1	834022	835241	-			IAQ61_000278	KAH9881552.1	388	hypothetical protein IAQ61_000278
Un	JACTNS010000001.1	836183	837609	+			IAQ61_000279	KAH9881553.1	442	hypothetical protein IAQ61_000279
Un	JACTNS010000001.1	839512	840209	+			IAQ61_000280	KAH9881554.1	198	hypothetical protein IAQ61_000280
Un	JACTNS010000001.1	843249	844344	+			IAQ61_000281	KAH9881555.1	341	hypothetical protein IAQ61_000281
Un	JACTNS010000001.1	844541	845907	+			IAQ61_000282	KAH9881556.1	319	hypothetical protein IAQ61_000282
Un	JACTNS010000001.1	846400	847138	+			IAQ61_000283	KAH9881557.1	179	hypothetical protein IAQ61_000283, partial
Un	JACTNS010000001.1	848704	849527	+			IAQ61_000284	KAH9881558.1	155	hypothetical protein IAQ61_000284
Un	JACTNS010000001.1	849933	850862	-			IAQ61_000285	KAH9881559.1	309	hypothetical protein IAQ61_000285
Un	JACTNS010000001.1	851497	852383	+			IAQ61_000286	KAH9881560.1	271	hypothetical protein IAQ61_000286
Un	JACTNS010000001.1	854877	856754	+			IAQ61_000287	KAH9881561.1	625	hypothetical protein IAQ61_000287
Un	JACTNS010000001.1	857570	858431	-			IAQ61_000288	KAH9881562.1	193	hypothetical protein IAQ61_000288, partial
Un	JACTNS010000001.1	858654	859190	+			IAQ61_000289	KAH9881563.1	178	hypothetical protein IAQ61_000289
Un	JACTNS010000001.1	860300	860821	-			IAQ61_000290	KAH9881564.1	173	hypothetical protein IAQ61_000290
Un	JACTNS010000001.1	861880	863177	-			IAQ61_000291	KAH9881565.1	387	hypothetical protein IAQ61_000291, partial
Un	JACTNS010000001.1	863375	865656	+		UTP25	IAQ61_000292	KAH9881566.1	741	rRNA-binding ribosome biosynthesis protein utp25
Un	JACTNS010000001.1	866009	866923	-			IAQ61_000293	KAH9881567.1	304	hypothetical protein IAQ61_000293
Un	JACTNS010000001.1	867920	870457	-			IAQ61_000294	KAH9881568.1	845	hypothetical protein IAQ61_000294
Un	JACTNS010000001.1	871446	873019	-			IAQ61_000295	KAH9881569.1	273	hypothetical protein IAQ61_000295
Un	JACTNS010000001.1	873048	873266	+			IAQ61_000296	KAH9881570.1	72	hypothetical protein IAQ61_000296
Un	JACTNS010000001.1	873791	874661	+			IAQ61_000297	KAH9881571.1	200	hypothetical protein IAQ61_000297
Un	JACTNS010000001.1	875819	877066	-			IAQ61_000298	KAH9881572.1	415	hypothetical protein IAQ61_000298
Un	JACTNS010000001.1	879203	879738	-			IAQ61_000299	KAH9881573.1	137	hypothetical protein IAQ61_000299, partial
Un	JACTNS010000001.1	880274	880651	+			IAQ61_000300	KAH9881574.1	125	hypothetical protein IAQ61_000300
Un	JACTNS010000001.1	881826	882317	+			IAQ61_000301	KAH9881575.1	163	hypothetical protein IAQ61_000301
Un	JACTNS010000001.1	884234	884593	+			IAQ61_000302	KAH9881576.1	100	hypothetical protein IAQ61_000302
Un	JACTNS010000001.1	889114	891528	-			IAQ61_000303	KAH9881577.1	782	hypothetical protein IAQ61_000303
Un	JACTNS010000001.1	891661	891993	+			IAQ61_000304	KAH9881578.1	110	hypothetical protein IAQ61_000304
Un	JACTNS010000001.1	892389	893975	+			IAQ61_000305	KAH9881579.1	490	hypothetical protein IAQ61_000305
Un	JACTNS010000001.1	895114	895927	+			IAQ61_000306	KAH9881580.1	243	hypothetical protein IAQ61_000306
Un	JACTNS010000001.1	897087	898219	+			IAQ61_000307	KAH9881581.1	312	hypothetical protein IAQ61_000307
Un	JACTNS010000001.1	916270	917223	+			IAQ61_000308	KAH9881582.1	317	hypothetical protein IAQ61_000308
Un	JACTNS010000001.1	918392	919650	+			IAQ61_000309	KAH9881583.1	402	hypothetical protein IAQ61_000309
Un	JACTNS010000001.1	920263	921465	+			IAQ61_000310	KAH9881584.1	400	hypothetical protein IAQ61_000310
Un	JACTNS010000001.1	921850	924365	-			IAQ61_000311	KAH9881585.1	801	hypothetical protein IAQ61_000311
Un	JACTNS010000001.1	925849	928413	+			IAQ61_000312	KAH9881586.1	585	hypothetical protein IAQ61_000312, partial
Un	JACTNS010000001.1	929159	929980	-			IAQ61_000313	KAH9881587.1	273	hypothetical protein IAQ61_000313
Un	JACTNS010000001.1	930866	931336	+			IAQ61_000314	KAH9881588.1	156	hypothetical protein IAQ61_000314
Un	JACTNS010000001.1	931477	931890	+			IAQ61_000315	KAH9881589.1	137	hypothetical protein IAQ61_000315
Un	JACTNS010000001.1	932111	933511	+			IAQ61_000316	KAH9881590.1	466	hypothetical protein IAQ61_000316
Un	JACTNS010000001.1	933679	936113	-			IAQ61_000317	KAH9881591.1	599	hypothetical protein IAQ61_000317
Un	JACTNS010000001.1	938284	938812	+			IAQ61_000318	KAH9881592.1	172	hypothetical protein IAQ61_000318, partial
Un	JACTNS010000001.1	938913	943247	+			IAQ61_000319	KAH9881593.1	1444	hypothetical protein IAQ61_000319
Un	JACTNS010000001.1	944674	945584	-			IAQ61_000320	KAH9881594.1	278	hypothetical protein IAQ61_000320
Un	JACTNS010000001.1	945964	949790	-			IAQ61_000321	KAH9881595.1	1258	hypothetical protein IAQ61_000321
Un	JACTNS010000001.1	949849	950187	+			IAQ61_000322	KAH9881596.1	77	hypothetical protein IAQ61_000322
Un	JACTNS010000001.1	950260	951522	+			IAQ61_000323	KAH9881597.1	420	hypothetical protein IAQ61_000323
Un	JACTNS010000001.1	952180	953533	-			IAQ61_000324	KAH9881598.1	212	hypothetical protein IAQ61_000324
Un	JACTNS010000001.1	953652	954950	-			IAQ61_000325	KAH9881599.1	362	hypothetical protein IAQ61_000325
Un	JACTNS010000001.1	956490	957119	+			IAQ61_000326	KAH9881600.1	149	hypothetical protein IAQ61_000326
Un	JACTNS010000001.1	957523	958253	+			IAQ61_000327	KAH9881601.1	169	hypothetical protein IAQ61_000327
Un	JACTNS010000001.1	959477	960139	+			IAQ61_000328	KAH9881602.1	220	hypothetical protein IAQ61_000328
Un	JACTNS010000001.1	962237	964465	+			IAQ61_000330	KAH9881603.1	459	hypothetical protein IAQ61_000330
Un	JACTNS010000001.1	964484	964850	-			IAQ61_000331	KAH9881604.1	81	hypothetical protein IAQ61_000331
Un	JACTNS010000001.1	969337	970558	+			IAQ61_000332	KAH9881605.1	388	hypothetical protein IAQ61_000332
Un	JACTNS010000001.1	1006494	1007594	-			IAQ61_000333	KAH9881606.1	366	hypothetical protein IAQ61_000333
Un	JACTNS010000001.1	1007699	1008235	+			IAQ61_000334	KAH9881607.1	76	hypothetical protein IAQ61_000334
Un	JACTNS010000001.1	1008737	1011768	+			IAQ61_000335	KAH9881608.1	947	hypothetical protein IAQ61_000335
Un	JACTNS010000001.1	1013538	1015695	-			IAQ61_000336	KAH9881609.1	512	hypothetical protein IAQ61_000336
Un	JACTNS010000001.1	1016056	1017099	+			IAQ61_000337	KAH9881610.1	328	hypothetical protein IAQ61_000337
Un	JACTNS010000001.1	1020152	1020334	+			IAQ61_000338	KAH9881611.1	60	hypothetical protein IAQ61_000338
Un	JACTNS010000001.1	1020485	1023787	+			IAQ61_000339	KAH9881612.1	984	hypothetical protein IAQ61_000339
Un	JACTNS010000001.1	1024384	1027069	+			IAQ61_000340	KAH9881613.1	811	hypothetical protein IAQ61_000340
Un	JACTNS010000001.1	1027684	1029283	-			IAQ61_000341	KAH9881614.1	493	hypothetical protein IAQ61_000341
Un	JACTNS010000001.1	1029676	1031333	-			IAQ61_000342	KAH9881615.1	501	hypothetical protein IAQ61_000342
Un	JACTNS010000001.1	1032073	1032957	+			IAQ61_000343	KAH9881616.1	251	hypothetical protein IAQ61_000343
Un	JACTNS010000001.1	1033183	1036185	-			IAQ61_000344	KAH9881617.1	1000	hypothetical protein IAQ61_000344
Un	JACTNS010000001.1	1036624	1037016	-			IAQ61_000345	KAH9881618.1	130	hypothetical protein IAQ61_000345
Un	JACTNS010000001.1	1037692	1038767	-			IAQ61_000346	KAH9881619.1	336	hypothetical protein IAQ61_000346
Un	JACTNS010000001.1	1039386	1040195	+			IAQ61_000347	KAH9881620.1	269	hypothetical protein IAQ61_000347
Un	JACTNS010000001.1	1041088	1042377	+			IAQ61_000348	KAH9881621.1	429	hypothetical protein IAQ61_000348
Un	JACTNS010000001.1	1043315	1043810	-			IAQ61_000349	KAH9881622.1	79	hypothetical protein IAQ61_000349
Un	JACTNS010000001.1	1044877	1047233	+			IAQ61_000350	KAH9881623.1	766	hypothetical protein IAQ61_000350
Un	JACTNS010000001.1	1047960	1049708	-			IAQ61_000351	KAH9881624.1	561	hypothetical protein IAQ61_000351
Un	JACTNS010000001.1	1051025	1051776	+			IAQ61_000352	KAH9881625.1	224	hypothetical protein IAQ61_000352, partial
Un	JACTNS010000001.1	1053972	1057136	-			IAQ61_000353	KAH9881626.1	834	hypothetical protein IAQ61_000353, partial
Un	JACTNS010000001.1	1060686	1061200	-			IAQ61_000354	KAH9881627.1	131	hypothetical protein IAQ61_000354, partial
Un	JACTNS010000001.1	1066211	1067466	+			IAQ61_000355	KAH9881628.1	295	hypothetical protein IAQ61_000355, partial
Un	JACTNS010000001.1	1069389	1070360	-			IAQ61_000356	KAH9881629.1	268	hypothetical protein IAQ61_000356
Un	JACTNS010000001.1	1071005	1074604	-			IAQ61_000357	KAH9881630.1	1120	hypothetical protein IAQ61_000357
Un	JACTNS010000001.1	1077943	1079330	-			IAQ61_000358	KAH9881631.1	323	hypothetical protein IAQ61_000358
Un	JACTNS010000001.1	1079586	1080181	+			IAQ61_000359	KAH9881632.1	162	hypothetical protein IAQ61_000359
Un	JACTNS010000001.1	1080339	1082083	-			IAQ61_000360	KAH9881633.1	479	hypothetical protein IAQ61_000360
Un	JACTNS010000001.1	1082407	1082909	+			IAQ61_000361	KAH9881634.1	111	hypothetical protein IAQ61_000361
Un	JACTNS010000001.1	1083385	1085119	-		ALG11	IAQ61_000362	KAH9881635.1	541	asparagine-linked glycosylation protein
Un	JACTNS010000001.1	1085340	1086512	+			IAQ61_000363	KAH9881636.1	390	hypothetical protein IAQ61_000363
Un	JACTNS010000001.1	1087215	1088168	+			IAQ61_000364	KAH9881637.1	317	hypothetical protein IAQ61_000364
Un	JACTNS010000001.1	1134949	1135988	-			IAQ61_000365	KAH9881638.1	318	hypothetical protein IAQ61_000365
Un	JACTNS010000001.1	1138218	1138544	-			IAQ61_000366	KAH9881639.1	108	hypothetical protein IAQ61_000366
Un	JACTNS010000001.1	1138950	1139366	-			IAQ61_000367	KAH9881640.1	138	hypothetical protein IAQ61_000367
Un	JACTNS010000001.1	1140322	1141245	+			IAQ61_000368	KAH9881641.1	307	hypothetical protein IAQ61_000368
Un	JACTNS010000001.1	1141511	1143120	-			IAQ61_000369	KAH9881642.1	520	hypothetical protein IAQ61_000369
Un	JACTNS010000001.1	1143347	1145314	+			IAQ61_000370	KAH9881643.1	613	hypothetical protein IAQ61_000370
Un	JACTNS010000001.1	1145879	1146537	-		RPS23	IAQ61_000371	KAH9881644.1	145	40S ribosomal protein S23
Un	JACTNS010000001.1	1146511	1147853	+			IAQ61_000372	KAH9881645.1	411	hypothetical protein IAQ61_000372
Un	JACTNS010000001.1	1148061	1149798	-			IAQ61_000373	KAH9881646.1	499	hypothetical protein IAQ61_000373
Un	JACTNS010000001.1	1150908	1152266	+			IAQ61_000374	KAH9881647.1	452	hypothetical protein IAQ61_000374
Un	JACTNS010000001.1	1152917	1153117	+			IAQ61_000375	KAH9881648.1	66	hypothetical protein IAQ61_000375
Un	JACTNS010000001.1	1153613	1154822	+		CCP1	IAQ61_000376	KAH9881649.1	376	heme peroxidase
Un	JACTNS010000001.1	1155226	1156655	-			IAQ61_000377	KAH9881650.1	459	hypothetical protein IAQ61_000377
Un	JACTNS010000001.1	1156844	1157671	-		GRX5	IAQ61_000378	KAH9881651.1	169	monothiol glutaredoxin grx5
Un	JACTNS010000001.1	1158099	1161121	-			IAQ61_000379	KAH9881652.1	920	hypothetical protein IAQ61_000379
Un	JACTNS010000001.1	1161722	1163423	-			IAQ61_000380	KAH9881653.1	530	hypothetical protein IAQ61_000380
Un	JACTNS010000001.1	1164194	1165778	+			IAQ61_000381	KAH9881654.1	483	hypothetical protein IAQ61_000381
Un	JACTNS010000001.1	1166869	1167777	+			IAQ61_000382	KAH9881655.1	233	hypothetical protein IAQ61_000382
Un	JACTNS010000001.1	1167818	1169089	+			IAQ61_000383	KAH9881656.1	423	hypothetical protein IAQ61_000383
Un	JACTNS010000001.1	1169361	1170398	+			IAQ61_000384	KAH9881657.1	345	hypothetical protein IAQ61_000384
Un	JACTNS010000001.1	1170838	1171213	+			IAQ61_000385	KAH9881658.1	83	hypothetical protein IAQ61_000385
Un	JACTNS010000001.1	1172849	1174633	-			IAQ61_000386	KAH9881659.1	594	hypothetical protein IAQ61_000386
Un	JACTNS010000001.1	1174705	1175315	+			IAQ61_000387	KAH9881660.1	84	hypothetical protein IAQ61_000387
Un	JACTNS010000001.1	1177531	1178924	-			IAQ61_000388	KAH9881661.1	146	hypothetical protein IAQ61_000388, partial
Un	JACTNS010000001.1	1179017	1179352	+			IAQ61_000389	KAH9881662.1	111	hypothetical protein IAQ61_000389
Un	JACTNS010000001.1	1180650	1181907	-			IAQ61_000390	KAH9881663.1	380	hypothetical protein IAQ61_000390
Un	JACTNS010000001.1	1182222	1183564	-			IAQ61_000391	KAH9881664.1	430	hypothetical protein IAQ61_000391
Un	JACTNS010000001.1	1185584	1185873	+			IAQ61_000392	KAH9881665.1	86	hypothetical protein IAQ61_000392, partial
Un	JACTNS010000001.1	1187000	1187839	-			IAQ61_000393	KAH9881666.1	279	hypothetical protein IAQ61_000393
Un	JACTNS010000001.1	1188548	1189821	-			IAQ61_000394	KAH9881667.1	405	hypothetical protein IAQ61_000394
Un	JACTNS010000001.1	1190677	1191316	+			IAQ61_000395	KAH9881668.1	132	hypothetical protein IAQ61_000395
Un	JACTNS010000001.1	1191884	1193940	+			IAQ61_000396	KAH9881669.1	447	hypothetical protein IAQ61_000396
Un	JACTNS010000001.1	1195474	1195773	+			IAQ61_000397	KAH9881670.1	83	hypothetical protein IAQ61_000397
Un	JACTNS010000001.1	1196930	1197469	+			IAQ61_000398	KAH9881671.1	179	hypothetical protein IAQ61_000398
Un	JACTNS010000001.1	1197680	1199581	+			IAQ61_000399	KAH9881672.1	428	hypothetical protein IAQ61_000399
Un	JACTNS010000001.1	1200178	1200519	-			IAQ61_000400	KAH9881673.1	113	hypothetical protein IAQ61_000400
Un	JACTNS010000001.1	1201086	1202065	+			IAQ61_000401	KAH9881674.1	310	hypothetical protein IAQ61_000401
Un	JACTNS010000001.1	1202868	1203107	-			IAQ61_000402	KAH9881675.1	79	hypothetical protein IAQ61_000402
Un	JACTNS010000001.1	1203683	1204200	-			IAQ61_000403	KAH9881676.1	137	hypothetical protein IAQ61_000403
Un	JACTNS010000001.1	1205180	1205383	-			IAQ61_000404	KAH9881677.1	67	hypothetical protein IAQ61_000404
Un	JACTNS010000001.1	1205970	1207500	+			IAQ61_000405	KAH9881678.1	406	hypothetical protein IAQ61_000405
Un	JACTNS010000001.1	1208209	1209782	-			IAQ61_000406	KAH9881679.1	487	hypothetical protein IAQ61_000406
Un	JACTNS010000001.1	1210192	1211730	+			IAQ61_000407	KAH9881680.1	512	hypothetical protein IAQ61_000407
Un	JACTNS010000001.1	1212724	1214568	+			IAQ61_000408	KAH9881681.1	614	hypothetical protein IAQ61_000408
Un	JACTNS010000001.1	1214977	1219450	-			IAQ61_000409	KAH9881682.1	1304	hypothetical protein IAQ61_000409, partial
Un	JACTNS010000001.1	1220456	1222086	-			IAQ61_000410	KAH9881683.1	527	hypothetical protein IAQ61_000410
Un	JACTNS010000001.1	1223230	1224270	+			IAQ61_000411	KAH9881684.1	312	hypothetical protein IAQ61_000411
Un	JACTNS010000001.1	1227782	1229531	+			IAQ61_000412	KAH9881685.1	525	hypothetical protein IAQ61_000412
Un	JACTNS010000001.1	1230063	1231824	-			IAQ61_000413	KAH9881686.1	565	hypothetical protein IAQ61_000413
Un	JACTNS010000001.1	1232660	1233988	+			IAQ61_000414	KAH9881687.1	442	hypothetical protein IAQ61_000414
Un	JACTNS010000001.1	1234370	1236068	-			IAQ61_000415	KAH9881688.1	448	hypothetical protein IAQ61_000415
Un	JACTNS010000001.1	1237202	1238710	-			IAQ61_000416	KAH9881689.1	287	hypothetical protein IAQ61_000416
Un	JACTNS010000001.1	1238846	1239841	-			IAQ61_000417	KAH9881690.1	159	hypothetical protein IAQ61_000417
Un	JACTNS010000001.1	1240599	1241819	+			IAQ61_000418	KAH9881691.1	363	hypothetical protein IAQ61_000418
Un	JACTNS010000001.1	1242501	1245928	+		NUT1	IAQ61_000419	KAH9881692.1	1044	mediator complex subunit
Un	JACTNS010000001.1	1246371	1247893	+			IAQ61_000420	KAH9881693.1	253	hypothetical protein IAQ61_000420
Un	JACTNS010000001.1	1248234	1249542	-			IAQ61_000421	KAH9881694.1	415	hypothetical protein IAQ61_000421
Un	JACTNS010000001.1	1250726	1252022	+			IAQ61_000422	KAH9881695.1	339	hypothetical protein IAQ61_000422
Un	JACTNS010000001.1	1252909	1253322	-			IAQ61_000423	KAH9881696.1	112	hypothetical protein IAQ61_000423
Un	JACTNS010000001.1	1253524	1254370	-			IAQ61_000424	KAH9881697.1	198	hypothetical protein IAQ61_000424, partial
Un	JACTNS010000001.1	1254885	1255833	+			IAQ61_000425	KAH9881698.1	298	hypothetical protein IAQ61_000425
Un	JACTNS010000001.1	1422219	1422983	+			IAQ61_000426	KAH9881699.1	221	hypothetical protein IAQ61_000426
Un	JACTNS010000001.1	1423471	1424628	-			IAQ61_000427	KAH9881700.1	350	hypothetical protein IAQ61_000427
Un	JACTNS010000001.1	1425895	1427091	-			IAQ61_000428	KAH9881701.1	398	hypothetical protein IAQ61_000428
Un	JACTNS010000001.1	1427528	1428388	+			IAQ61_000429	KAH9881702.1	286	hypothetical protein IAQ61_000429
Un	JACTNS010000001.1	1428829	1429949	-			IAQ61_000430	KAH9881703.1	352	hypothetical protein IAQ61_000430
Un	JACTNS010000001.1	1430481	1431153	+			IAQ61_000431	KAH9881704.1	128	hypothetical protein IAQ61_000431
Un	JACTNS010000001.1	1431355	1433938	-			IAQ61_000432	KAH9881705.1	792	hypothetical protein IAQ61_000432
Un	JACTNS010000001.1	1434158	1434757	+			IAQ61_000433	KAH9881706.1	94	hypothetical protein IAQ61_000433
Un	JACTNS010000001.1	1434772	1438044	+			IAQ61_000434	KAH9881707.1	1020	hypothetical protein IAQ61_000434
Un	JACTNS010000001.1	1438377	1439283	-			IAQ61_000435	KAH9881708.1	272	hypothetical protein IAQ61_000435
Un	JACTNS010000001.1	1439418	1439749	-			IAQ61_000436	KAH9881709.1	85	hypothetical protein IAQ61_000436
Un	JACTNS010000001.1	1439849	1442225	+			IAQ61_000437	KAH9881710.1	699	hypothetical protein IAQ61_000437
Un	JACTNS010000001.1	1443006	1444035	-			IAQ61_000438	KAH9881711.1	193	hypothetical protein IAQ61_000438
Un	JACTNS010000001.1	1445107	1445361	-			IAQ61_000439	KAH9881712.1	84	hypothetical protein IAQ61_000439
Un	JACTNS010000001.1	1446087	1449442	+			IAQ61_000440	KAH9881713.1	1094	hypothetical protein IAQ61_000440
Un	JACTNS010000001.1	1449987	1452764	-			IAQ61_000441	KAH9881714.1	860	hypothetical protein IAQ61_000441
Un	JACTNS010000001.1	1656898	1658062	+			IAQ61_000442	KAH9881715.1	369	hypothetical protein IAQ61_000442
Un	JACTNS010000001.1	1658184	1659412	-			IAQ61_000443	KAH9881716.1	390	hypothetical protein IAQ61_000443
Un	JACTNS010000001.1	1660394	1662153	-			IAQ61_000444	KAH9881717.1	478	hypothetical protein IAQ61_000444
Un	JACTNS010000001.1	1663053	1663611	+			IAQ61_000445	KAH9881718.1	108	hypothetical protein IAQ61_000445, partial
Un	JACTNS010000001.1	1664604	1664801	+			IAQ61_000446	KAH9881719.1	65	hypothetical protein IAQ61_000446
Un	JACTNS010000001.1	1666473	1668489	-			IAQ61_000447	KAH9881720.1	632	hypothetical protein IAQ61_000447
Un	JACTNS010000001.1	1668808	1669092	-			IAQ61_000448	KAH9881721.1	94	hypothetical protein IAQ61_000448
Un	JACTNS010000001.1	1670331	1670754	+			IAQ61_000449	KAH9881722.1	70	hypothetical protein IAQ61_000449
Un	JACTNS010000001.1	1671025	1671303	+			IAQ61_000450	KAH9881723.1	92	hypothetical protein IAQ61_000450
Un	JACTNS010000001.1	1671888	1672713	+			IAQ61_000451	KAH9881724.1	256	hypothetical protein IAQ61_000451
Un	JACTNS010000001.1	1673371	1674091	+			IAQ61_000452	KAH9881725.1	174	hypothetical protein IAQ61_000452, partial
Un	JACTNS010000001.1	1674425	1674740	+			IAQ61_000453	KAH9881726.1	74	hypothetical protein IAQ61_000453
Un	JACTNS010000001.1	1674851	1675165	-			IAQ61_000454	KAH9881727.1	104	hypothetical protein IAQ61_000454
Un	JACTNS010000001.1	1675201	1676758	-			IAQ61_000455	KAH9881728.1	484	hypothetical protein IAQ61_000455, partial
Un	JACTNS010000001.1	1680145	1680972	+			IAQ61_000457	KAH9881729.1	275	hypothetical protein IAQ61_000457
Un	JACTNS010000001.1	1681075	1681682	-			IAQ61_000458	KAH9881730.1	149	hypothetical protein IAQ61_000458
Un	JACTNS010000001.1	1682402	1685250	-		RNR1	IAQ61_000459	KAH9881731.1	903	ribonucleotide-diphosphate reductase subunit rnr1
Un	JACTNS010000001.1	1691528	1692345	+			IAQ61_000460	KAH9881732.1	255	hypothetical protein IAQ61_000460
Un	JACTNS010000001.1	1692647	1693208	+			IAQ61_000461	KAH9881733.1	170	hypothetical protein IAQ61_000461
Un	JACTNS010000001.1	1694485	1695230	+			IAQ61_000462	KAH9881734.1	151	hypothetical protein IAQ61_000462
Un	JACTNS010000001.1	1695705	1699433	-			IAQ61_000463	KAH9881735.1	1120	hypothetical protein IAQ61_000463, partial
Un	JACTNS010000001.1	1699677	1701180	+			IAQ61_000464	KAH9881736.1	412	hypothetical protein IAQ61_000464
Un	JACTNS010000001.1	1702631	1704116	+			IAQ61_000465	KAH9881737.1	401	hypothetical protein IAQ61_000465
Un	JACTNS010000001.1	1803041	1803621	-			IAQ61_000466	KAH9881738.1	144	hypothetical protein IAQ61_000466
Un	JACTNS010000001.1	1824560	1825258	+			IAQ61_000467	KAH9881739.1	232	hypothetical protein IAQ61_000467
Un	JACTNS010000001.1	1825398	1825886	-			IAQ61_000468	KAH9881740.1	162	hypothetical protein IAQ61_000468
Un	JACTNS010000001.1	1826266	1826730	-			IAQ61_000469	KAH9881741.1	154	hypothetical protein IAQ61_000469
Un	JACTNS010000001.1	1914327	1915646	-			IAQ61_000470	KAH9881742.1	439	hypothetical protein IAQ61_000470
Un	JACTNS010000001.1	1916346	1916537	+			IAQ61_000471	KAH9881743.1	63	hypothetical protein IAQ61_000471
Un	JACTNS010000001.1	1916898	1919331	-			IAQ61_000472	KAH9881744.1	788	hypothetical protein IAQ61_000472
Un	JACTNS010000001.1	2002667	2011281	-			IAQ61_000473	KAH9881745.1	2756	hypothetical protein IAQ61_000473
Un	JACTNS010000001.1	2011449	2012545	+			IAQ61_000474	KAH9881746.1	163	hypothetical protein IAQ61_000474
Un	JACTNS010000001.1	2012567	2013373	+			IAQ61_000475	KAH9881747.1	242	hypothetical protein IAQ61_000475
Un	JACTNS010000001.1	2014444	2015385	+			IAQ61_000476	KAH9881748.1	313	hypothetical protein IAQ61_000476
Un	JACTNS010000001.1	2017083	2017969	+			IAQ61_000477	KAH9881749.1	275	hypothetical protein IAQ61_000477, partial
Un	JACTNS010000001.1	2019329	2019934	-			IAQ61_000478	KAH9881750.1	201	hypothetical protein IAQ61_000478
Un	JACTNS010000001.1	2019931	2021158	-			IAQ61_000479	KAH9881751.1	334	hypothetical protein IAQ61_000479
Un	JACTNS010000001.1	2021934	2023444	+			IAQ61_000480	KAH9881752.1	465	hypothetical protein IAQ61_000480
Un	JACTNS010000001.1	2024011	2024931	+			IAQ61_000481	KAH9881753.1	306	hypothetical protein IAQ61_000481
Un	JACTNS010000001.1	2132305	2132877	-			IAQ61_000482	KAH9881754.1	190	hypothetical protein IAQ61_000482
Un	JACTNS010000001.1	2140044	2140565	+			IAQ61_000483	KAH9881755.1	120	hypothetical protein IAQ61_000483
Un	JACTNS010000003.1	162988	163914	-			IAQ61_000484	KAH9880195.1	308	hypothetical protein IAQ61_000484
Un	JACTNS010000003.1	164280	164564	-			IAQ61_000485	KAH9880196.1	87	hypothetical protein IAQ61_000485, partial
Un	JACTNS010000003.1	165254	165484	+			IAQ61_000486	KAH9880197.1	76	hypothetical protein IAQ61_000486
Un	JACTNS010000003.1	165600	167321	+			IAQ61_000487	KAH9880198.1	573	hypothetical protein IAQ61_000487
Un	JACTNS010000003.1	167810	168824	+			IAQ61_000488	KAH9880199.1	297	hypothetical protein IAQ61_000488
Un	JACTNS010000003.1	169025	171405	-		NOG2	IAQ61_000489	KAH9880200.1	612	GTPase required for pre-60S ribosomal subunit nuclear export and maturation
Un	JACTNS010000003.1	171696	172637	+			IAQ61_000490	KAH9880201.1	313	hypothetical protein IAQ61_000490
Un	JACTNS010000003.1	173629	174615	+			IAQ61_000491	KAH9880202.1	294	hypothetical protein IAQ61_000491
Un	JACTNS010000003.1	175302	178336	-			IAQ61_000492	KAH9880203.1	556	hypothetical protein IAQ61_000492, partial
Un	JACTNS010000003.1	179313	181391	+			IAQ61_000493	KAH9880204.1	579	hypothetical protein IAQ61_000493
Un	JACTNS010000003.1	181897	183243	-			IAQ61_000494	KAH9880205.1	448	hypothetical protein IAQ61_000494
Un	JACTNS010000003.1	184095	185012	+			IAQ61_000495	KAH9880206.1	305	hypothetical protein IAQ61_000495
Un	JACTNS010000003.1	185601	188913	-			IAQ61_000496	KAH9880207.1	1024	hypothetical protein IAQ61_000496
Un	JACTNS010000003.1	189458	190776	+			IAQ61_000497	KAH9880208.1	418	hypothetical protein IAQ61_000497
Un	JACTNS010000003.1	191371	192651	-			IAQ61_000498	KAH9880209.1	410	hypothetical protein IAQ61_000498
Un	JACTNS010000003.1	193435	194568	+			IAQ61_000499	KAH9880210.1	377	hypothetical protein IAQ61_000499
Un	JACTNS010000003.1	194984	196375	-			IAQ61_000500	KAH9880211.1	402	hypothetical protein IAQ61_000500
Un	JACTNS010000003.1	197235	198980	+			IAQ61_000501	KAH9880212.1	459	hypothetical protein IAQ61_000501
Un	JACTNS010000003.1	199171	200463	-			IAQ61_000502	KAH9880213.1	430	hypothetical protein IAQ61_000502
Un	JACTNS010000003.1	201020	201928	+			IAQ61_000503	KAH9880214.1	302	hypothetical protein IAQ61_000503
Un	JACTNS010000003.1	231145	231570	-			IAQ61_000504	KAH9880215.1	141	hypothetical protein IAQ61_000504
Un	JACTNS010000003.1	231830	232087	+			IAQ61_000505	KAH9880216.1	68	hypothetical protein IAQ61_000505
Un	JACTNS010000003.1	232602	233048	-			IAQ61_000506	KAH9880217.1	129	hypothetical protein IAQ61_000506, partial
Un	JACTNS010000003.1	273223	273654	+			IAQ61_000507	KAH9880218.1	143	hypothetical protein IAQ61_000507
Un	JACTNS010000003.1	305420	306022	+			IAQ61_000508	KAH9880219.1	152	hypothetical protein IAQ61_000508
Un	JACTNS010000003.1	306509	308850	-			IAQ61_000509	KAH9880220.1	763	hypothetical protein IAQ61_000509
Un	JACTNS010000003.1	309421	311525	+			IAQ61_000510	KAH9880221.1	683	hypothetical protein IAQ61_000510
Un	JACTNS010000003.1	312722	315596	+			IAQ61_000511	KAH9880222.1	893	hypothetical protein IAQ61_000511
Un	JACTNS010000003.1	317033	317296	+			IAQ61_000512	KAH9880223.1	87	hypothetical protein IAQ61_000512
Un	JACTNS010000003.1	317603	320692	+			IAQ61_000513	KAH9880224.1	1004	hypothetical protein IAQ61_000513
Un	JACTNS010000003.1	321642	323145	+			IAQ61_000514	KAH9880225.1	483	hypothetical protein IAQ61_000514
Un	JACTNS010000003.1	323783	324668	+			IAQ61_000515	KAH9880226.1	255	hypothetical protein IAQ61_000515
Un	JACTNS010000003.1	325133	325933	-			IAQ61_000516	KAH9880227.1	266	hypothetical protein IAQ61_000516
Un	JACTNS010000003.1	328174	333278	-			IAQ61_000517	KAH9880228.1	1681	hypothetical protein IAQ61_000517
Un	JACTNS010000003.1	335012	335473	+			IAQ61_000518	KAH9880229.1	153	hypothetical protein IAQ61_000518
Un	JACTNS010000003.1	336422	336698	+			IAQ61_000519	KAH9880230.1	63	hypothetical protein IAQ61_000519, partial
Un	JACTNS010000003.1	337194	338572	+			IAQ61_000520	KAH9880231.1	421	hypothetical protein IAQ61_000520
Un	JACTNS010000003.1	339523	340687	-			IAQ61_000521	KAH9880232.1	342	hypothetical protein IAQ61_000521
Un	JACTNS010000003.1	343728	346571	+			IAQ61_000522	KAH9880233.1	947	hypothetical protein IAQ61_000522
Un	JACTNS010000003.1	347639	349654	+			IAQ61_000523	KAH9880234.1	565	hypothetical protein IAQ61_000523
Un	JACTNS010000003.1	350747	351653	+			IAQ61_000524	KAH9880235.1	226	hypothetical protein IAQ61_000524
Un	JACTNS010000003.1	352387	353951	-			IAQ61_000525	KAH9880236.1	446	hypothetical protein IAQ61_000525
Un	JACTNS010000003.1	355062	355646	+			IAQ61_000526	KAH9880237.1	194	hypothetical protein IAQ61_000526
Un	JACTNS010000003.1	356125	356757	-			IAQ61_000527	KAH9880238.1	193	hypothetical protein IAQ61_000527
Un	JACTNS010000003.1	357104	358069	+			IAQ61_000528	KAH9880239.1	321	hypothetical protein IAQ61_000528
Un	JACTNS010000003.1	358619	360120	-			IAQ61_000529	KAH9880240.1	420	hypothetical protein IAQ61_000529
Un	JACTNS010000003.1	361684	366051	+			IAQ61_000530	KAH9880241.1	1407	hypothetical protein IAQ61_000530
Un	JACTNS010000003.1	367586	368101	-			IAQ61_000531	KAH9880242.1	133	hypothetical protein IAQ61_000531
Un	JACTNS010000003.1	369159	371035	-			IAQ61_000532	KAH9880243.1	520	hypothetical protein IAQ61_000532, partial
Un	JACTNS010000003.1	372892	373954	-			IAQ61_000533	KAH9880244.1	295	hypothetical protein IAQ61_000533
Un	JACTNS010000003.1	374128	374397	-			IAQ61_000534	KAH9880245.1	89	hypothetical protein IAQ61_000534
Un	JACTNS010000003.1	376151	376607	+			IAQ61_000535	KAH9880246.1	132	hypothetical protein IAQ61_000535
Un	JACTNS010000003.1	377113	380430	-			IAQ61_000536	KAH9880247.1	1105	hypothetical protein IAQ61_000536
Un	JACTNS010000003.1	381263	383343	+			IAQ61_000537	KAH9880248.1	625	hypothetical protein IAQ61_000537
Un	JACTNS010000003.1	383862	385198	-			IAQ61_000538	KAH9880249.1	407	hypothetical protein IAQ61_000538
Un	JACTNS010000003.1	385818	386465	+			IAQ61_000539	KAH9880250.1	215	hypothetical protein IAQ61_000539
Un	JACTNS010000003.1	386886	390280	-			IAQ61_000540	KAH9880251.1	1088	hypothetical protein IAQ61_000540
Un	JACTNS010000003.1	391407	397031	-			IAQ61_000541	KAH9880252.1	1838	hypothetical protein IAQ61_000541
Un	JACTNS010000003.1	399285	404715	+			IAQ61_000542	KAH9880253.1	1764	hypothetical protein IAQ61_000542
Un	JACTNS010000003.1	405319	406566	+		END3	IAQ61_000543	KAH9880254.1	415	endocytosis defective- protein
Un	JACTNS010000003.1	407013	408389	-			IAQ61_000544	KAH9880255.1	458	hypothetical protein IAQ61_000544
Un	JACTNS010000003.1	409328	413105	-			IAQ61_000545	KAH9880256.1	1215	hypothetical protein IAQ61_000545
Un	JACTNS010000003.1	416436	419130	+			IAQ61_000546	KAH9880257.1	859	hypothetical protein IAQ61_000546
Un	JACTNS010000003.1	421091	423686	-			IAQ61_000547	KAH9880258.1	845	hypothetical protein IAQ61_000547, partial
Un	JACTNS010000003.1	425731	427547	-			IAQ61_000548	KAH9880259.1	557	hypothetical protein IAQ61_000548
Un	JACTNS010000003.1	428810	430285	+			IAQ61_000549	KAH9880260.1	157	hypothetical protein IAQ61_000549, partial
Un	JACTNS010000003.1	433085	434005	-			IAQ61_000550	KAH9880261.1	289	hypothetical protein IAQ61_000550
Un	JACTNS010000003.1	434746	436544	-			IAQ61_000551	KAH9880262.1	533	hypothetical protein IAQ61_000551, partial
Un	JACTNS010000003.1	436527	436745	+			IAQ61_000552	KAH9880263.1	72	hypothetical protein IAQ61_000552
Un	JACTNS010000003.1	437513	440067	-			IAQ61_000553	KAH9880264.1	833	hypothetical protein IAQ61_000553
Un	JACTNS010000003.1	441141	442414	+			IAQ61_000554	KAH9880265.1	387	hypothetical protein IAQ61_000554
Un	JACTNS010000003.1	443012	444334	+			IAQ61_000555	KAH9880266.1	440	hypothetical protein IAQ61_000555
Un	JACTNS010000003.1	444756	445834	-			IAQ61_000556	KAH9880267.1	299	hypothetical protein IAQ61_000556
Un	JACTNS010000003.1	446434	447838	+			IAQ61_000557	KAH9880268.1	408	hypothetical protein IAQ61_000557
Un	JACTNS010000003.1	448264	450613	+			IAQ61_000558	KAH9880269.1	764	hypothetical protein IAQ61_000558
Un	JACTNS010000003.1	451576	455130	+			IAQ61_000559	KAH9880270.1	1143	hypothetical protein IAQ61_000559
Un	JACTNS010000003.1	456844	458538	-			IAQ61_000560	KAH9880271.1	514	hypothetical protein IAQ61_000560
Un	JACTNS010000003.1	458673	460110	+			IAQ61_000561	KAH9880272.1	431	hypothetical protein IAQ61_000561, partial
Un	JACTNS010000003.1	460582	462909	-			IAQ61_000562	KAH9880273.1	614	hypothetical protein IAQ61_000562
Un	JACTNS010000003.1	463522	463929	+			IAQ61_000563	KAH9880274.1	135	hypothetical protein IAQ61_000563
Un	JACTNS010000003.1	464166	464624	-			IAQ61_000564	KAH9880275.1	152	hypothetical protein IAQ61_000564
Un	JACTNS010000003.1	464706	465023	-			IAQ61_000565	KAH9880276.1	105	hypothetical protein IAQ61_000565
Un	JACTNS010000003.1	466048	466614	-			IAQ61_000566	KAH9880277.1	188	hypothetical protein IAQ61_000566
Un	JACTNS010000003.1	468315	468656	+			IAQ61_000567	KAH9880278.1	113	hypothetical protein IAQ61_000567
Un	JACTNS010000003.1	469067	470147	-			IAQ61_000568	KAH9880279.1	304	hypothetical protein IAQ61_000568
Un	JACTNS010000003.1	471103	472610	+			IAQ61_000569	KAH9880280.1	378	hypothetical protein IAQ61_000569
Un	JACTNS010000003.1	472831	475347	-			IAQ61_000570	KAH9880281.1	838	hypothetical protein IAQ61_000570
Un	JACTNS010000003.1	476399	477234	+			IAQ61_000571	KAH9880282.1	234	hypothetical protein IAQ61_000571
Un	JACTNS010000003.1	477481	480079	-			IAQ61_000572	KAH9880283.1	848	hypothetical protein IAQ61_000572
Un	JACTNS010000003.1	482513	485365	+			IAQ61_000573	KAH9880284.1	879	hypothetical protein IAQ61_000573
Un	JACTNS010000003.1	485785	489182	-			IAQ61_000574	KAH9880285.1	1099	hypothetical protein IAQ61_000574, partial
Un	JACTNS010000003.1	489383	491431	+			IAQ61_000575	KAH9880286.1	498	hypothetical protein IAQ61_000575, partial
Un	JACTNS010000003.1	491899	493701	+			IAQ61_000576	KAH9880287.1	535	hypothetical protein IAQ61_000576
Un	JACTNS010000003.1	494326	497138	+			IAQ61_000577	KAH9880288.1	888	hypothetical protein IAQ61_000577
Un	JACTNS010000003.1	498104	498573	-			IAQ61_000578	KAH9880289.1	127	hypothetical protein IAQ61_000578, partial
Un	JACTNS010000003.1	499522	501571	+			IAQ61_000579	KAH9880290.1	638	hypothetical protein IAQ61_000579
Un	JACTNS010000003.1	502345	503653	-			IAQ61_000580	KAH9880291.1	363	hypothetical protein IAQ61_000580
Un	JACTNS010000003.1	504122	505909	-			IAQ61_000581	KAH9880292.1	514	hypothetical protein IAQ61_000581
Un	JACTNS010000003.1	506720	509135	-			IAQ61_000582	KAH9880293.1	744	hypothetical protein IAQ61_000582
Un	JACTNS010000003.1	509690	512606	-		COT3	IAQ61_000583	KAH9880294.1	843	Elongation factor 2
Un	JACTNS010000003.1	513900	515268	-			IAQ61_000584	KAH9880295.1	417	hypothetical protein IAQ61_000584
Un	JACTNS010000003.1	515574	517076	+			IAQ61_000585	KAH9880296.1	466	hypothetical protein IAQ61_000585
Un	JACTNS010000003.1	518084	524185	-			IAQ61_000586	KAH9880297.1	2017	hypothetical protein IAQ61_000586
Un	JACTNS010000003.1	525345	527126	+		MRP3	IAQ61_000587	KAH9880298.1	495	Component of pyruvate dehydrogenase complex, mitochondrial
Un	JACTNS010000003.1	527737	530054	+			IAQ61_000588	KAH9880299.1	630	hypothetical protein IAQ61_000588
Un	JACTNS010000003.1	531260	533451	+			IAQ61_000589	KAH9880300.1	641	hypothetical protein IAQ61_000589
Un	JACTNS010000003.1	533789	535644	-			IAQ61_000590	KAH9880301.1	598	hypothetical protein IAQ61_000590, partial
Un	JACTNS010000003.1	536156	536422	+			IAQ61_000591	KAH9880302.1	88	hypothetical protein IAQ61_000591
Un	JACTNS010000003.1	536920	537366	-			IAQ61_000592	KAH9880303.1	148	hypothetical protein IAQ61_000592
Un	JACTNS010000003.1	537861	539612	-			IAQ61_000593	KAH9880304.1	383	hypothetical protein IAQ61_000593
Un	JACTNS010000003.1	539969	541072	-			IAQ61_000594	KAH9880305.1	352	hypothetical protein IAQ61_000594
Un	JACTNS010000003.1	541591	543114	-			IAQ61_000595	KAH9880306.1	507	hypothetical protein IAQ61_000595
Un	JACTNS010000003.1	544866	546750	-			IAQ61_000597	KAH9880307.1	496	hypothetical protein IAQ61_000597
Un	JACTNS010000003.1	546766	547101	-			IAQ61_000598	KAH9880308.1	111	hypothetical protein IAQ61_000598
Un	JACTNS010000003.1	548485	549675	-			IAQ61_000599	KAH9880309.1	396	hypothetical protein IAQ61_000599
Un	JACTNS010000003.1	550311	552829	+		HSP88	IAQ61_000600	KAH9880310.1	774	Heat shock protein hsp88
Un	JACTNS010000003.1	553374	554722	-			IAQ61_000601	KAH9880311.1	417	hypothetical protein IAQ61_000601
Un	JACTNS010000003.1	558960	560823	+			IAQ61_000602	KAH9880312.1	540	hypothetical protein IAQ61_000602
Un	JACTNS010000003.1	564762	565803	-			IAQ61_000604	KAH9880313.1	237	hypothetical protein IAQ61_000604
Un	JACTNS010000003.1	567636	567974	+			IAQ61_000605	KAH9880314.1	112	hypothetical protein IAQ61_000605
Un	JACTNS010000003.1	568288	568518	+			IAQ61_000606	KAH9880315.1	76	hypothetical protein IAQ61_000606
Un	JACTNS010000003.1	568541	569373	-			IAQ61_000607	KAH9880316.1	258	hypothetical protein IAQ61_000607, partial
Un	JACTNS010000003.1	570163	572650	+			IAQ61_000608	KAH9880317.1	801	hypothetical protein IAQ61_000608
Un	JACTNS010000003.1	573628	574473	-			IAQ61_000609	KAH9880318.1	281	hypothetical protein IAQ61_000609
Un	JACTNS010000003.1	574821	575751	-			IAQ61_000610	KAH9880319.1	220	hypothetical protein IAQ61_000610
Un	JACTNS010000003.1	576365	578780	+			IAQ61_000611	KAH9880320.1	727	hypothetical protein IAQ61_000611
Un	JACTNS010000003.1	580190	580372	-			IAQ61_000612	KAH9880321.1	60	hypothetical protein IAQ61_000612
Un	JACTNS010000003.1	580419	583635	+			IAQ61_000613	KAH9880322.1	992	hypothetical protein IAQ61_000613
Un	JACTNS010000003.1	584567	585414	+			IAQ61_000614	KAH9880323.1	244	hypothetical protein IAQ61_000614
Un	JACTNS010000003.1	585852	590270	-		TR06	IAQ61_000615	KAH9880324.1	1348	ABC-type transporter tr06
Un	JACTNS010000003.1	590550	590920	+			IAQ61_000616	KAH9880325.1	100	hypothetical protein IAQ61_000616
Un	JACTNS010000003.1	591088	593886	-			IAQ61_000617	KAH9880326.1	932	hypothetical protein IAQ61_000617
Un	JACTNS010000003.1	594361	595304	-			IAQ61_000618	KAH9880327.1	270	hypothetical protein IAQ61_000618
Un	JACTNS010000003.1	596031	596581	+			IAQ61_000619	KAH9880328.1	73	hypothetical protein IAQ61_000619
Un	JACTNS010000003.1	596951	598253	-		TVP38	IAQ61_000620	KAH9880329.1	343	Tlg2-vesicle protein
Un	JACTNS010000003.1	598301	599109	-			IAQ61_000621	KAH9880330.1	174	hypothetical protein IAQ61_000621
Un	JACTNS010000003.1	599780	600851	-			IAQ61_000622	KAH9880331.1	310	hypothetical protein IAQ61_000622
Un	JACTNS010000003.1	601390	602144	-			IAQ61_000623	KAH9880332.1	175	hypothetical protein IAQ61_000623
Un	JACTNS010000003.1	602949	606936	-			IAQ61_000624	KAH9880333.1	1206	hypothetical protein IAQ61_000624
Un	JACTNS010000003.1	608000	608215	+			IAQ61_000625	KAH9880334.1	71	hypothetical protein IAQ61_000625
Un	JACTNS010000003.1	609316	610840	+			IAQ61_000626	KAH9880335.1	113	hypothetical protein IAQ61_000626
Un	JACTNS010000003.1	610859	611917	+			IAQ61_000627	KAH9880336.1	334	hypothetical protein IAQ61_000627
Un	JACTNS010000003.1	612627	616505	+		STU1_1	IAQ61_000628	KAH9880337.1	1214	suppressor of tub2 mutation
Un	JACTNS010000003.1	617956	620356	-			IAQ61_000629	KAH9880338.1	737	hypothetical protein IAQ61_000629
Un	JACTNS010000003.1	620944	622099	+			IAQ61_000630	KAH9880339.1	349	hypothetical protein IAQ61_000630
Un	JACTNS010000003.1	622727	625421	+			IAQ61_000631	KAH9880340.1	774	hypothetical protein IAQ61_000631
Un	JACTNS010000003.1	625443	626281	+			IAQ61_000632	KAH9880341.1	140	hypothetical protein IAQ61_000632
Un	JACTNS010000003.1	631282	631986	+			IAQ61_000633	KAH9880342.1	234	hypothetical protein IAQ61_000633
Un	JACTNS010000003.1	632697	635161	-			IAQ61_000634	KAH9880343.1	771	hypothetical protein IAQ61_000634
Un	JACTNS010000003.1	637068	637676	+			IAQ61_000635	KAH9880344.1	103	hypothetical protein IAQ61_000635, partial
Un	JACTNS010000003.1	638751	640028	-			IAQ61_000636	KAH9880345.1	425	hypothetical protein IAQ61_000636
Un	JACTNS010000003.1	640308	640723	+			IAQ61_000637	KAH9880346.1	93	hypothetical protein IAQ61_000637
Un	JACTNS010000003.1	640770	641957	-			IAQ61_000638	KAH9880347.1	349	hypothetical protein IAQ61_000638
Un	JACTNS010000003.1	642825	644549	+			IAQ61_000639	KAH9880348.1	532	hypothetical protein IAQ61_000639
Un	JACTNS010000003.1	645838	647829	-			IAQ61_000640	KAH9880349.1	663	hypothetical protein IAQ61_000640
Un	JACTNS010000003.1	649854	650915	+			IAQ61_000641	KAH9880350.1	336	hypothetical protein IAQ61_000641
Un	JACTNS010000003.1	652227	652565	-			IAQ61_000642	KAH9880351.1	73	hypothetical protein IAQ61_000642
Un	JACTNS010000003.1	653653	655832	+			IAQ61_000643	KAH9880352.1	429	hypothetical protein IAQ61_000643
Un	JACTNS010000003.1	655819	656233	-			IAQ61_000644	KAH9880353.1	97	hypothetical protein IAQ61_000644
Un	JACTNS010000003.1	657191	658088	-			IAQ61_000645	KAH9880354.1	280	hypothetical protein IAQ61_000645
Un	JACTNS010000003.1	658451	661325	+			IAQ61_000646	KAH9880355.1	922	hypothetical protein IAQ61_000646
Un	JACTNS010000003.1	663740	664686	+			IAQ61_000647	KAH9880356.1	206	hypothetical protein IAQ61_000647, partial
Un	JACTNS010000003.1	668745	670080	-			IAQ61_000648	KAH9880357.1	410	hypothetical protein IAQ61_000648
Un	JACTNS010000003.1	670664	671822	+			IAQ61_000649	KAH9880358.1	349	hypothetical protein IAQ61_000649
Un	JACTNS010000003.1	672534	673331	+			IAQ61_000650	KAH9880359.1	265	hypothetical protein IAQ61_000650
Un	JACTNS010000003.1	673723	674766	+			IAQ61_000651	KAH9880360.1	347	hypothetical protein IAQ61_000651
Un	JACTNS010000003.1	676233	679002	-			IAQ61_000652	KAH9880361.1	789	hypothetical protein IAQ61_000652
Un	JACTNS010000003.1	679937	684003	+			IAQ61_000653	KAH9880362.1	1272	hypothetical protein IAQ61_000653
Un	JACTNS010000003.1	684818	685075	-			IAQ61_000654	KAH9880363.1	85	hypothetical protein IAQ61_000654
Un	JACTNS010000003.1	685246	686618	+			IAQ61_000655	KAH9880364.1	440	hypothetical protein IAQ61_000655
Un	JACTNS010000003.1	687039	687608	-			IAQ61_000656	KAH9880365.1	189	hypothetical protein IAQ61_000656
Un	JACTNS010000003.1	701024	702800	+			IAQ61_000657	KAH9880366.1	555	hypothetical protein IAQ61_000657
Un	JACTNS010000003.1	704480	705064	-			IAQ61_000658	KAH9880367.1	194	hypothetical protein IAQ61_000658
Un	JACTNS010000003.1	707037	708157	-			IAQ61_000659	KAH9880368.1	354	hypothetical protein IAQ61_000659
Un	JACTNS010000003.1	708907	711256	-			IAQ61_000660	KAH9880369.1	670	hypothetical protein IAQ61_000660
Un	JACTNS010000003.1	712002	712878	+			IAQ61_000661	KAH9880370.1	250	hypothetical protein IAQ61_000661
Un	JACTNS010000003.1	713194	714156	+			IAQ61_000662	KAH9880371.1	320	hypothetical protein IAQ61_000662
Un	JACTNS010000003.1	715084	715692	-			IAQ61_000663	KAH9880372.1	202	hypothetical protein IAQ61_000663
Un	JACTNS010000003.1	717440	717979	-			IAQ61_000664	KAH9880373.1	179	hypothetical protein IAQ61_000664
Un	JACTNS010000003.1	719074	721380	-			IAQ61_000665	KAH9880374.1	424	hypothetical protein IAQ61_000665, partial
Un	JACTNS010000003.1	722864	723189	-			IAQ61_000666	KAH9880375.1	62	hypothetical protein IAQ61_000666, partial
Un	JACTNS010000003.1	723612	725792	+			IAQ61_000667	KAH9880376.1	665	hypothetical protein IAQ61_000667
Un	JACTNS010000003.1	726169	730143	+			IAQ61_000668	KAH9880377.1	1307	hypothetical protein IAQ61_000668
Un	JACTNS010000003.1	734479	735204	-			IAQ61_000669	KAH9880378.1	241	hypothetical protein IAQ61_000669
Un	JACTNS010000003.1	735744	737259	+			IAQ61_000670	KAH9880379.1	447	hypothetical protein IAQ61_000670
Un	JACTNS010000003.1	737349	738038	-			IAQ61_000671	KAH9880380.1	229	hypothetical protein IAQ61_000671
Un	JACTNS010000003.1	739811	741383	+			IAQ61_000672	KAH9880381.1	469	hypothetical protein IAQ61_000672
Un	JACTNS010000003.1	742872	744520	+			IAQ61_000673	KAH9880382.1	532	hypothetical protein IAQ61_000673
Un	JACTNS010000003.1	745275	747341	-			IAQ61_000674	KAH9880383.1	547	hypothetical protein IAQ61_000674
Un	JACTNS010000003.1	747804	749033	-			IAQ61_000675	KAH9880384.1	341	hypothetical protein IAQ61_000675
Un	JACTNS010000003.1	750948	751727	-			IAQ61_000676	KAH9880385.1	186	hypothetical protein IAQ61_000676
Un	JACTNS010000003.1	754953	759589	-			IAQ61_000677	KAH9880386.1	1390	hypothetical protein IAQ61_000677
Un	JACTNS010000003.1	762809	764258	-			IAQ61_000678	KAH9880387.1	430	hypothetical protein IAQ61_000678
Un	JACTNS010000003.1	765287	765876	-		FIS1	IAQ61_000679	KAH9880388.1	154	mitochondrial membrane protein
Un	JACTNS010000003.1	766393	767147	+			IAQ61_000680	KAH9880389.1	196	hypothetical protein IAQ61_000680
Un	JACTNS010000003.1	768028	773052	-			IAQ61_000681	KAH9880390.1	1551	hypothetical protein IAQ61_000681
Un	JACTNS010000003.1	774777	775514	+			IAQ61_000682	KAH9880391.1	245	hypothetical protein IAQ61_000682
Un	JACTNS010000003.1	795173	796146	-			IAQ61_000683	KAH9880392.1	279	hypothetical protein IAQ61_000683, partial
Un	JACTNS010000003.1	797461	797754	+			IAQ61_000684	KAH9880393.1	97	hypothetical protein IAQ61_000684
Un	JACTNS010000003.1	798948	799154	-			IAQ61_000685	KAH9880394.1	68	hypothetical protein IAQ61_000685
Un	JACTNS010000003.1	800043	802900	+			IAQ61_000686	KAH9880395.1	873	hypothetical protein IAQ61_000686
Un	JACTNS010000003.1	807509	809124	-			IAQ61_000687	KAH9880396.1	505	hypothetical protein IAQ61_000687
Un	JACTNS010000003.1	809818	813150	+			IAQ61_000688	KAH9880397.1	1071	hypothetical protein IAQ61_000688
Un	JACTNS010000003.1	813581	815193	-			IAQ61_000689	KAH9880398.1	409	hypothetical protein IAQ61_000689
Un	JACTNS010000003.1	815878	818081	+			IAQ61_000690	KAH9880399.1	697	hypothetical protein IAQ61_000690
Un	JACTNS010000003.1	818474	820051	+			IAQ61_000691	KAH9880400.1	525	hypothetical protein IAQ61_000691
Un	JACTNS010000003.1	820849	822866	-			IAQ61_000692	KAH9880401.1	574	hypothetical protein IAQ61_000692
Un	JACTNS010000003.1	825797	828197	-			IAQ61_000693	KAH9880402.1	677	hypothetical protein IAQ61_000693
Un	JACTNS010000003.1	828900	838643	+			IAQ61_000694	KAH9880403.1	3247	hypothetical protein IAQ61_000694
Un	JACTNS010000003.1	839607	840113	-			IAQ61_000695	KAH9880404.1	168	hypothetical protein IAQ61_000695
Un	JACTNS010000003.1	840347	843243	+			IAQ61_000696	KAH9880405.1	927	hypothetical protein IAQ61_000696
Un	JACTNS010000003.1	844028	848041	+			IAQ61_000697	KAH9880406.1	1273	hypothetical protein IAQ61_000697
Un	JACTNS010000003.1	848527	848760	+			IAQ61_000698	KAH9880407.1	77	hypothetical protein IAQ61_000698
Un	JACTNS010000003.1	850824	851273	+			IAQ61_000699	KAH9880408.1	149	hypothetical protein IAQ61_000699
Un	JACTNS010000003.1	851550	852587	-			IAQ61_000700	KAH9880409.1	345	hypothetical protein IAQ61_000700
Un	JACTNS010000003.1	853368	854730	+		MDH1	IAQ61_000701	KAH9880410.1	339	Malate dehydrogenase, cytoplasmic
Un	JACTNS010000003.1	855718	857896	+			IAQ61_000702	KAH9880411.1	638	hypothetical protein IAQ61_000702
Un	JACTNS010000003.1	859125	860884	+			IAQ61_000703	KAH9880412.1	408	hypothetical protein IAQ61_000703
Un	JACTNS010000003.1	861873	862682	-			IAQ61_000704	KAH9880413.1	132	hypothetical protein IAQ61_000704, partial
Un	JACTNS010000003.1	863368	864227	-			IAQ61_000705	KAH9880414.1	250	hypothetical protein IAQ61_000705
Un	JACTNS010000003.1	864829	865086	+			IAQ61_000706	KAH9880415.1	85	hypothetical protein IAQ61_000706
Un	JACTNS010000003.1	865794	867305	-			IAQ61_000707	KAH9880416.1	471	hypothetical protein IAQ61_000707
Un	JACTNS010000003.1	868283	869518	-			IAQ61_000708	KAH9880417.1	325	hypothetical protein IAQ61_000708
Un	JACTNS010000003.1	869803	872027	+			IAQ61_000709	KAH9880418.1	713	hypothetical protein IAQ61_000709
Un	JACTNS010000003.1	872263	875480	-			IAQ61_000710	KAH9880419.1	1038	hypothetical protein IAQ61_000710
Un	JACTNS010000003.1	876368	878174	+			IAQ61_000711	KAH9880420.1	483	hypothetical protein IAQ61_000711
Un	JACTNS010000003.1	880050	883636	+			IAQ61_000712	KAH9880421.1	1141	hypothetical protein IAQ61_000712
Un	JACTNS010000003.1	884349	885112	+			IAQ61_000713	KAH9880422.1	196	hypothetical protein IAQ61_000713
Un	JACTNS010000003.1	885806	886907	+		SUI2	IAQ61_000714	KAH9880423.1	311	eukaryotic translation initiation factor 2 subunit alpha
Un	JACTNS010000003.1	887768	890337	+			IAQ61_000715	KAH9880424.1	696	hypothetical protein IAQ61_000715
Un	JACTNS010000003.1	891151	891714	-			IAQ61_000716	KAH9880425.1	187	hypothetical protein IAQ61_000716
Un	JACTNS010000003.1	892432	893616	+			IAQ61_000717	KAH9880426.1	361	hypothetical protein IAQ61_000717
Un	JACTNS010000003.1	893771	894412	+			IAQ61_000718	KAH9880427.1	213	hypothetical protein IAQ61_000718
Un	JACTNS010000003.1	895715	897384	+			IAQ61_000719	KAH9880428.1	476	hypothetical protein IAQ61_000719
Un	JACTNS010000003.1	898687	899073	+			IAQ61_000720	KAH9880429.1	128	hypothetical protein IAQ61_000720
Un	JACTNS010000003.1	900339	900992	+			IAQ61_000721	KAH9880430.1	217	hypothetical protein IAQ61_000721
Un	JACTNS010000003.1	902157	902753	-			IAQ61_000722	KAH9880431.1	198	hypothetical protein IAQ61_000722
Un	JACTNS010000003.1	903551	904264	-			IAQ61_000723	KAH9880432.1	237	hypothetical protein IAQ61_000723
Un	JACTNS010000003.1	906293	907533	+			IAQ61_000724	KAH9880433.1	351	hypothetical protein IAQ61_000724
Un	JACTNS010000003.1	907830	909731	-			IAQ61_000725	KAH9880434.1	524	hypothetical protein IAQ61_000725
Un	JACTNS010000003.1	910175	911802	+			IAQ61_000726	KAH9880435.1	490	hypothetical protein IAQ61_000726
Un	JACTNS010000003.1	912430	913686	-			IAQ61_000727	KAH9880436.1	418	hypothetical protein IAQ61_000727
Un	JACTNS010000003.1	914033	914582	+			IAQ61_000728	KAH9880437.1	164	hypothetical protein IAQ61_000728
Un	JACTNS010000003.1	915594	915899	-			IAQ61_000729	KAH9880438.1	101	hypothetical protein IAQ61_000729
Un	JACTNS010000003.1	916943	917875	-			IAQ61_000730	KAH9880439.1	310	hypothetical protein IAQ61_000730
Un	JACTNS010000003.1	918284	919295	-			IAQ61_000731	KAH9880440.1	154	hypothetical protein IAQ61_000731
Un	JACTNS010000003.1	919929	921317	+			IAQ61_000732	KAH9880441.1	462	hypothetical protein IAQ61_000732
Un	JACTNS010000003.1	921468	922509	-			IAQ61_000733	KAH9880442.1	313	hypothetical protein IAQ61_000733
Un	JACTNS010000003.1	924248	926391	-			IAQ61_000734	KAH9880443.1	647	hypothetical protein IAQ61_000734, partial
Un	JACTNS010000003.1	952867	953456	-			IAQ61_000735	KAH9880444.1	181	hypothetical protein IAQ61_000735, partial
Un	JACTNS010000003.1	953885	956033	-			IAQ61_000736	KAH9880445.1	534	hypothetical protein IAQ61_000736
Un	JACTNS010000003.1	957130	958225	+			IAQ61_000737	KAH9880446.1	343	hypothetical protein IAQ61_000737
Un	JACTNS010000003.1	963057	964001	+			IAQ61_000738	KAH9880447.1	237	hypothetical protein IAQ61_000738, partial
Un	JACTNS010000003.1	968876	969871	-			IAQ61_000739	KAH9880448.1	331	hypothetical protein IAQ61_000739
Un	JACTNS010000003.1	972886	973842	+			IAQ61_000740	KAH9880449.1	318	hypothetical protein IAQ61_000740
Un	JACTNS010000003.1	974026	976376	-			IAQ61_000741	KAH9880450.1	484	hypothetical protein IAQ61_000741, partial
Un	JACTNS010000003.1	977250	978137	-			IAQ61_000742	KAH9880451.1	295	hypothetical protein IAQ61_000742
Un	JACTNS010000003.1	984916	987712	-			IAQ61_000743	KAH9880452.1	907	hypothetical protein IAQ61_000743
Un	JACTNS010000003.1	989105	989832	-			IAQ61_000744	KAH9880453.1	226	hypothetical protein IAQ61_000744
Un	JACTNS010000003.1	990842	991765	+			IAQ61_000745	KAH9880454.1	307	hypothetical protein IAQ61_000745
Un	JACTNS010000003.1	992439	995243	+			IAQ61_000746	KAH9880455.1	884	hypothetical protein IAQ61_000746
Un	JACTNS010000003.1	995951	998483	-			IAQ61_000747	KAH9880456.1	822	hypothetical protein IAQ61_000747
Un	JACTNS010000003.1	999644	1001568	+			IAQ61_000748	KAH9880457.1	625	hypothetical protein IAQ61_000748
Un	JACTNS010000003.1	1002118	1002902	+			IAQ61_000749	KAH9880458.1	93	hypothetical protein IAQ61_000749
Un	JACTNS010000003.1	1002928	1004658	+		CDC3	IAQ61_000750	KAH9880459.1	462	Cell division control protein 3
Un	JACTNS010000003.1	1005865	1006164	-			IAQ61_000751	KAH9880460.1	99	hypothetical protein IAQ61_000751
Un	JACTNS010000003.1	1006360	1007286	+			IAQ61_000752	KAH9880461.1	280	hypothetical protein IAQ61_000752
Un	JACTNS010000003.1	1008680	1008898	+			IAQ61_000753	KAH9880462.1	72	hypothetical protein IAQ61_000753
Un	JACTNS010000003.1	1009677	1009901	-			IAQ61_000754	KAH9880463.1	74	hypothetical protein IAQ61_000754
Un	JACTNS010000003.1	1010395	1011700	+			IAQ61_000755	KAH9880464.1	262	hypothetical protein IAQ61_000755
Un	JACTNS010000003.1	1013601	1016736	+			IAQ61_000756	KAH9880465.1	886	hypothetical protein IAQ61_000756
Un	JACTNS010000003.1	1017300	1018439	+			IAQ61_000757	KAH9880466.1	290	hypothetical protein IAQ61_000757
Un	JACTNS010000003.1	1018729	1019820	-			IAQ61_000758	KAH9880467.1	363	hypothetical protein IAQ61_000758
Un	JACTNS010000003.1	1021091	1023282	+			IAQ61_000759	KAH9880468.1	595	hypothetical protein IAQ61_000759
Un	JACTNS010000003.1	1024064	1024999	+			IAQ61_000760	KAH9880469.1	311	hypothetical protein IAQ61_000760
Un	JACTNS010000003.1	1027983	1028924	+			IAQ61_000761	KAH9880470.1	165	hypothetical protein IAQ61_000761
Un	JACTNS010000003.1	1030144	1030777	+			IAQ61_000762	KAH9880471.1	193	hypothetical protein IAQ61_000762
Un	JACTNS010000003.1	1030935	1031186	-			IAQ61_000763	KAH9880472.1	83	hypothetical protein IAQ61_000763
Un	JACTNS010000003.1	1041049	1042482	-			IAQ61_000764	KAH9880473.1	477	hypothetical protein IAQ61_000764
Un	JACTNS010000003.1	1042940	1044634	+			IAQ61_000765	KAH9880474.1	545	hypothetical protein IAQ61_000765
Un	JACTNS010000003.1	1044898	1046775	-			IAQ61_000766	KAH9880475.1	507	hypothetical protein IAQ61_000766
Un	JACTNS010000003.1	1047513	1048961	+			IAQ61_000767	KAH9880476.1	449	hypothetical protein IAQ61_000767
Un	JACTNS010000003.1	1049819	1050568	-			IAQ61_000768	KAH9880477.1	249	hypothetical protein IAQ61_000768
Un	JACTNS010000003.1	1050987	1052027	-			IAQ61_000769	KAH9880478.1	346	hypothetical protein IAQ61_000769
Un	JACTNS010000003.1	1052602	1054495	+			IAQ61_000770	KAH9880479.1	594	hypothetical protein IAQ61_000770
Un	JACTNS010000003.1	1054992	1057003	+			IAQ61_000771	KAH9880480.1	564	hypothetical protein IAQ61_000771
Un	JACTNS010000003.1	1060743	1063950	+		BST1	IAQ61_000772	KAH9880481.1	1051	GPI inositol deacylase
Un	JACTNS010000003.1	1064927	1068534	-			IAQ61_000773	KAH9880482.1	1182	hypothetical protein IAQ61_000773
Un	JACTNS010000003.1	1069637	1069903	-			IAQ61_000774	KAH9880483.1	88	hypothetical protein IAQ61_000774
Un	JACTNS010000003.1	1069977	1071579	-			IAQ61_000775	KAH9880484.1	501	hypothetical protein IAQ61_000775, partial
Un	JACTNS010000003.1	1073315	1076630	-		CEF3	IAQ61_000776	KAH9880485.1	1063	translation elongation factor EF-3
Un	JACTNS010000003.1	1078449	1080017	-			IAQ61_000777	KAH9880486.1	487	hypothetical protein IAQ61_000777
Un	JACTNS010000003.1	1080429	1082514	-			IAQ61_000778	KAH9880487.1	678	hypothetical protein IAQ61_000778
Un	JACTNS010000003.1	1082824	1083547	+		ANB1	IAQ61_000779	KAH9880488.1	162	translation initiation factor eIF5A
Un	JACTNS010000003.1	1084309	1086003	+			IAQ61_000780	KAH9880489.1	530	hypothetical protein IAQ61_000780
Un	JACTNS010000003.1	1086412	1086952	+		UBI1	IAQ61_000781	KAH9880490.1	128	Polyubiquitin
Un	JACTNS010000003.1	1087894	1089753	-			IAQ61_000782	KAH9880491.1	619	hypothetical protein IAQ61_000782
Un	JACTNS010000003.1	1090877	1092611	+			IAQ61_000783	KAH9880492.1	469	hypothetical protein IAQ61_000783, partial
Un	JACTNS010000003.1	1093861	1095112	+			IAQ61_000785	KAH9880493.1	343	hypothetical protein IAQ61_000785, partial
Un	JACTNS010000003.1	1095274	1096318	-			IAQ61_000786	KAH9880494.1	329	hypothetical protein IAQ61_000786
Un	JACTNS010000003.1	1096731	1098064	+			IAQ61_000787	KAH9880495.1	385	hypothetical protein IAQ61_000787
Un	JACTNS010000003.1	1098210	1098997	-			IAQ61_000788	KAH9880496.1	198	hypothetical protein IAQ61_000788
Un	JACTNS010000003.1	1099444	1100547	+			IAQ61_000789	KAH9880497.1	367	hypothetical protein IAQ61_000789
Un	JACTNS010000003.1	1100489	1101375	-			IAQ61_000790	KAH9880498.1	143	hypothetical protein IAQ61_000790
Un	JACTNS010000003.1	1102001	1103724	-		IDH2	IAQ61_000791	KAH9880499.1	459	NAD-dependent isocitrate dehydrogenase
Un	JACTNS010000003.1	1103706	1104017	+			IAQ61_000792	KAH9880500.1	103	hypothetical protein IAQ61_000792
Un	JACTNS010000003.1	1106650	1107132	-			IAQ61_000793	KAH9880501.1	160	hypothetical protein IAQ61_000793
Un	JACTNS010000003.1	1107489	1107893	-			IAQ61_000794	KAH9880502.1	134	hypothetical protein IAQ61_000794
Un	JACTNS010000003.1	1108309	1109250	+			IAQ61_000795	KAH9880503.1	313	hypothetical protein IAQ61_000795
Un	JACTNS010000003.1	1109720	1111527	-			IAQ61_000796	KAH9880504.1	585	hypothetical protein IAQ61_000796
Un	JACTNS010000003.1	1112040	1114132	+			IAQ61_000797	KAH9880505.1	682	hypothetical protein IAQ61_000797
Un	JACTNS010000003.1	1115340	1116812	+			IAQ61_000798	KAH9880506.1	457	hypothetical protein IAQ61_000798
Un	JACTNS010000003.1	1117959	1120041	+		ACU8	IAQ61_000799	KAH9880507.1	533	Acetyl-CoA hydrolase
Un	JACTNS010000003.1	1120212	1121201	-			IAQ61_000800	KAH9880508.1	329	hypothetical protein IAQ61_000800
Un	JACTNS010000003.1	1122161	1123610	-			IAQ61_000801	KAH9880509.1	466	hypothetical protein IAQ61_000801, partial
Un	JACTNS010000003.1	1124517	1125566	-			IAQ61_000802	KAH9880510.1	267	hypothetical protein IAQ61_000802, partial
Un	JACTNS010000003.1	1126242	1128573	+			IAQ61_000803	KAH9880511.1	762	hypothetical protein IAQ61_000803, partial
Un	JACTNS010000003.1	1129078	1130855	+			IAQ61_000804	KAH9880512.1	504	hypothetical protein IAQ61_000804
Un	JACTNS010000003.1	1132473	1135750	-			IAQ61_000805	KAH9880513.1	1076	hypothetical protein IAQ61_000805
Un	JACTNS010000003.1	1137426	1138384	-		CYP3_1	IAQ61_000807	KAH9880514.1	225	Peptidyl-prolyl cis-trans isomerase H, partial
Un	JACTNS010000003.1	1139643	1141868	+			IAQ61_000808	KAH9880515.1	741	hypothetical protein IAQ61_000808
Un	JACTNS010000003.1	1142177	1144807	-			IAQ61_000809	KAH9880516.1	610	hypothetical protein IAQ61_000809
Un	JACTNS010000003.1	1144908	1147587	+			IAQ61_000810	KAH9880517.1	858	hypothetical protein IAQ61_000810
Un	JACTNS010000003.1	1148762	1149949	-			IAQ61_000811	KAH9880518.1	395	hypothetical protein IAQ61_000811
Un	JACTNS010000003.1	1155898	1157136	-			IAQ61_000812	KAH9880519.1	78	hypothetical protein IAQ61_000812, partial
Un	JACTNS010000003.1	1157923	1158219	-			IAQ61_000813	KAH9880520.1	98	hypothetical protein IAQ61_000813
Un	JACTNS010000003.1	1158290	1160046	+			IAQ61_000814	KAH9880521.1	535	hypothetical protein IAQ61_000814
Un	JACTNS010000003.1	1160236	1160568	-			IAQ61_000815	KAH9880522.1	110	hypothetical protein IAQ61_000815
Un	JACTNS010000003.1	1162499	1163541	-			IAQ61_000816	KAH9880523.1	324	hypothetical protein IAQ61_000816
Un	JACTNS010000003.1	1163920	1164909	-			IAQ61_000817	KAH9880524.1	329	hypothetical protein IAQ61_000817
Un	JACTNS010000003.1	1166049	1167447	+			IAQ61_000818	KAH9880525.1	445	hypothetical protein IAQ61_000818
Un	JACTNS010000003.1	1167583	1168011	-			IAQ61_000819	KAH9880526.1	142	hypothetical protein IAQ61_000819
Un	JACTNS010000003.1	1168725	1169680	-			IAQ61_000820	KAH9880527.1	275	hypothetical protein IAQ61_000820, partial
Un	JACTNS010000003.1	1170139	1171846	+			IAQ61_000821	KAH9880528.1	533	hypothetical protein IAQ61_000821
Un	JACTNS010000003.1	1172174	1173253	-			IAQ61_000822	KAH9880529.1	321	hypothetical protein IAQ61_000822
Un	JACTNS010000003.1	1174872	1175135	-			IAQ61_000823	KAH9880530.1	87	hypothetical protein IAQ61_000823
Un	JACTNS010000003.1	1176634	1177065	+			IAQ61_000824	KAH9880531.1	143	hypothetical protein IAQ61_000824
Un	JACTNS010000003.1	1180008	1181391	-		GNA3	IAQ61_000825	KAH9880532.1	355	G protein alpha subunit
Un	JACTNS010000003.1	1183765	1186932	+			IAQ61_000826	KAH9880533.1	901	hypothetical protein IAQ61_000826, partial
Un	JACTNS010000003.1	1187480	1190375	-			IAQ61_000827	KAH9880534.1	701	hypothetical protein IAQ61_000827
Un	JACTNS010000003.1	1191609	1194208	-		HOG1	IAQ61_000828	KAH9880535.1	526	MAPK protein hog1
Un	JACTNS010000003.1	1194741	1196211	-			IAQ61_000829	KAH9880536.1	450	hypothetical protein IAQ61_000829
Un	JACTNS010000003.1	1196285	1197751	-			IAQ61_000830	KAH9880537.1	488	hypothetical protein IAQ61_000830
Un	JACTNS010000003.1	1211265	1212684	-			IAQ61_000831	KAH9880538.1	266	hypothetical protein IAQ61_000831, partial
Un	JACTNS010000003.1	1214169	1214598	-			IAQ61_000832	KAH9880539.1	107	hypothetical protein IAQ61_000832
Un	JACTNS010000003.1	1217891	1219779	+			IAQ61_000833	KAH9880540.1	566	hypothetical protein IAQ61_000833
Un	JACTNS010000003.1	1220692	1222566	-			IAQ61_000834	KAH9880541.1	587	hypothetical protein IAQ61_000834
Un	JACTNS010000003.1	1224300	1225661	+			IAQ61_000835	KAH9880542.1	391	hypothetical protein IAQ61_000835
Un	JACTNS010000003.1	1226794	1227271	+			IAQ61_000836	KAH9880543.1	99	hypothetical protein IAQ61_000836
Un	JACTNS010000003.1	1227912	1229940	-			IAQ61_000837	KAH9880544.1	592	hypothetical protein IAQ61_000837
Un	JACTNS010000003.1	1230503	1232737	-			IAQ61_000838	KAH9880545.1	656	hypothetical protein IAQ61_000838, partial
Un	JACTNS010000003.1	1232916	1233173	+			IAQ61_000839	KAH9880546.1	69	hypothetical protein IAQ61_000839
Un	JACTNS010000003.1	1233621	1235330	+			IAQ61_000840	KAH9880547.1	569	hypothetical protein IAQ61_000840
Un	JACTNS010000003.1	1235661	1236588	-			IAQ61_000841	KAH9880548.1	290	hypothetical protein IAQ61_000841
Un	JACTNS010000003.1	1237319	1238911	-			IAQ61_000842	KAH9880549.1	530	hypothetical protein IAQ61_000842
Un	JACTNS010000003.1	1239482	1241937	-			IAQ61_000843	KAH9880550.1	779	hypothetical protein IAQ61_000843
Un	JACTNS010000003.1	1242482	1244625	-			IAQ61_000844	KAH9880551.1	660	hypothetical protein IAQ61_000844
Un	JACTNS010000003.1	1245296	1246777	+			IAQ61_000845	KAH9880552.1	454	hypothetical protein IAQ61_000845
Un	JACTNS010000003.1	1247342	1250248	-			IAQ61_000846	KAH9880553.1	968	hypothetical protein IAQ61_000846
Un	JACTNS010000003.1	1346617	1348234	+			IAQ61_000847	KAH9880554.1	485	hypothetical protein IAQ61_000847
Un	JACTNS010000003.1	1350285	1350605	+			IAQ61_000848	KAH9880555.1	106	hypothetical protein IAQ61_000848
Un	JACTNS010000003.1	1350928	1351242	+			IAQ61_000849	KAH9880556.1	104	hypothetical protein IAQ61_000849
Un	JACTNS010000003.1	1351808	1352980	-			IAQ61_000850	KAH9880557.1	390	hypothetical protein IAQ61_000850
Un	JACTNS010000003.1	1353921	1356173	-			IAQ61_000851	KAH9880558.1	750	hypothetical protein IAQ61_000851
Un	JACTNS010000003.1	1357022	1357711	-			IAQ61_000852	KAH9880559.1	128	hypothetical protein IAQ61_000852
Un	JACTNS010000003.1	1360499	1361001	-			IAQ61_000853	KAH9880560.1	158	hypothetical protein IAQ61_000853, partial
Un	JACTNS010000003.1	1363808	1364104	-			IAQ61_000854	KAH9880561.1	98	hypothetical protein IAQ61_000854
Un	JACTNS010000003.1	1364654	1365496	-			IAQ61_000855	KAH9880562.1	280	hypothetical protein IAQ61_000855
Un	JACTNS010000003.1	1366864	1367277	-			IAQ61_000856	KAH9880563.1	114	hypothetical protein IAQ61_000856, partial
Un	JACTNS010000003.1	1367414	1368071	+			IAQ61_000857	KAH9880564.1	116	hypothetical protein IAQ61_000857
Un	JACTNS010000003.1	1368606	1370100	+			IAQ61_000858	KAH9880565.1	323	hypothetical protein IAQ61_000858
Un	JACTNS010000003.1	1370857	1372484	+			IAQ61_000859	KAH9880566.1	525	hypothetical protein IAQ61_000859
Un	JACTNS010000003.1	1373512	1375644	+			IAQ61_000860	KAH9880567.1	549	hypothetical protein IAQ61_000860
Un	JACTNS010000003.1	1376470	1377322	-			IAQ61_000861	KAH9880568.1	264	hypothetical protein IAQ61_000861
Un	JACTNS010000003.1	1379750	1381863	-			IAQ61_000862	KAH9880569.1	671	hypothetical protein IAQ61_000862, partial
Un	JACTNS010000003.1	1381915	1382232	+			IAQ61_000863	KAH9880570.1	105	hypothetical protein IAQ61_000863
Un	JACTNS010000003.1	1383036	1384789	+			IAQ61_000864	KAH9880571.1	510	hypothetical protein IAQ61_000864
Un	JACTNS010000003.1	1388226	1390304	-			IAQ61_000865	KAH9880572.1	674	hypothetical protein IAQ61_000865
Un	JACTNS010000003.1	1391319	1392898	+			IAQ61_000866	KAH9880573.1	469	hypothetical protein IAQ61_000866
Un	JACTNS010000003.1	1394118	1395641	+			IAQ61_000867	KAH9880574.1	433	hypothetical protein IAQ61_000867
Un	JACTNS010000003.1	1397028	1399361	-		CAT1	IAQ61_000868	KAH9880575.1	743	catalase A
Un	JACTNS010000003.1	1402712	1402957	+			IAQ61_000869	KAH9880576.1	81	hypothetical protein IAQ61_000869
Un	JACTNS010000003.1	1404310	1405591	+			IAQ61_000870	KAH9880577.1	263	hypothetical protein IAQ61_000870
Un	JACTNS010000003.1	1406822	1407043	-			IAQ61_000871	KAH9880578.1	73	hypothetical protein IAQ61_000871
Un	JACTNS010000003.1	1407744	1409048	+		MDM12	IAQ61_000872	KAH9880579.1	434	Mitochondrial distribution and morphology protein 12
Un	JACTNS010000003.1	1411414	1414525	+			IAQ61_000873	KAH9880580.1	987	hypothetical protein IAQ61_000873
Un	JACTNS010000003.1	1415464	1420374	+			IAQ61_000874	KAH9880581.1	1453	hypothetical protein IAQ61_000874
Un	JACTNS010000003.1	1421327	1422378	-			IAQ61_000875	KAH9880582.1	332	hypothetical protein IAQ61_000875
Un	JACTNS010000003.1	1423103	1425104	-			IAQ61_000876	KAH9880583.1	649	hypothetical protein IAQ61_000876
Un	JACTNS010000003.1	1426318	1429629	+			IAQ61_000877	KAH9880584.1	1067	hypothetical protein IAQ61_000877
Un	JACTNS010000003.1	1429932	1431504	-			IAQ61_000878	KAH9880585.1	501	hypothetical protein IAQ61_000878
Un	JACTNS010000003.1	1432445	1434947	+			IAQ61_000879	KAH9880586.1	738	hypothetical protein IAQ61_000879
Un	JACTNS010000003.1	1435217	1435703	-		TIM10	IAQ61_000880	KAH9880587.1	97	protein transporter tim10
Un	JACTNS010000003.1	1436857	1437120	-			IAQ61_000881	KAH9880588.1	87	hypothetical protein IAQ61_000881
Un	JACTNS010000003.1	1437484	1437740	+			IAQ61_000882	KAH9880589.1	69	hypothetical protein IAQ61_000882
Un	JACTNS010000003.1	1438110	1438977	+			IAQ61_000883	KAH9880590.1	270	hypothetical protein IAQ61_000883
Un	JACTNS010000003.1	1439954	1440154	+			IAQ61_000884	KAH9880591.1	66	hypothetical protein IAQ61_000884
Un	JACTNS010000003.1	1441611	1443750	-			IAQ61_000886	KAH9880592.1	617	hypothetical protein IAQ61_000886, partial
Un	JACTNS010000003.1	1443982	1444951	+			IAQ61_000887	KAH9880593.1	244	hypothetical protein IAQ61_000887
Un	JACTNS010000003.1	1445672	1446001	+			IAQ61_000888	KAH9880594.1	109	hypothetical protein IAQ61_000888
Un	JACTNS010000003.1	1446104	1446914	+			IAQ61_000889	KAH9880595.1	235	hypothetical protein IAQ61_000889
Un	JACTNS010000003.1	1447127	1447522	+			IAQ61_000890	KAH9880596.1	131	hypothetical protein IAQ61_000890
Un	JACTNS010000003.1	1448243	1448704	-			IAQ61_000891	KAH9880597.1	101	hypothetical protein IAQ61_000891
Un	JACTNS010000003.1	1449752	1450797	-			IAQ61_000892	KAH9880598.1	220	hypothetical protein IAQ61_000892
Un	JACTNS010000003.1	1452268	1453983	-			IAQ61_000893	KAH9880599.1	517	hypothetical protein IAQ61_000893
Un	JACTNS010000003.1	1454538	1456048	-			IAQ61_000894	KAH9880600.1	436	hypothetical protein IAQ61_000894
Un	JACTNS010000003.1	1456217	1459383	+			IAQ61_000895	KAH9880601.1	919	hypothetical protein IAQ61_000895
Un	JACTNS010000003.1	1460439	1461930	+			IAQ61_000896	KAH9880602.1	371	hypothetical protein IAQ61_000896
Un	JACTNS010000003.1	1462359	1463226	+			IAQ61_000897	KAH9880603.1	271	hypothetical protein IAQ61_000897
Un	JACTNS010000003.1	1463661	1464344	+			IAQ61_000898	KAH9880604.1	227	hypothetical protein IAQ61_000898
Un	JACTNS010000003.1	1464405	1466197	+			IAQ61_000899	KAH9880605.1	420	hypothetical protein IAQ61_000899
Un	JACTNS010000003.1	1466336	1466785	-			IAQ61_000900	KAH9880606.1	149	hypothetical protein IAQ61_000900
Un	JACTNS010000003.1	1466885	1467160	-			IAQ61_000901	KAH9880607.1	91	hypothetical protein IAQ61_000901
Un	JACTNS010000003.1	1467703	1469332	-			IAQ61_000902	KAH9880608.1	460	hypothetical protein IAQ61_000902
Un	JACTNS010000003.1	1473209	1474126	+			IAQ61_000903	KAH9880609.1	278	hypothetical protein IAQ61_000903
Un	JACTNS010000003.1	1474848	1479237	-			IAQ61_000904	KAH9880610.1	960	hypothetical protein IAQ61_000904
Un	JACTNS010000003.1	1482549	1484348	-			IAQ61_000905	KAH9880611.1	497	hypothetical protein IAQ61_000905
Un	JACTNS010000003.1	1524209	1524412	-			IAQ61_000906	KAH9880612.1	67	hypothetical protein IAQ61_000906
Un	JACTNS010000003.1	1526967	1529051	+			IAQ61_000907	KAH9880613.1	694	hypothetical protein IAQ61_000907
Un	JACTNS010000003.1	1529140	1529517	-			IAQ61_000908	KAH9880614.1	91	hypothetical protein IAQ61_000908
Un	JACTNS010000003.1	1530424	1531516	+			IAQ61_000909	KAH9880615.1	292	hypothetical protein IAQ61_000909
Un	JACTNS010000003.1	1532066	1532521	+			IAQ61_000910	KAH9880616.1	151	hypothetical protein IAQ61_000910
Un	JACTNS010000003.1	1547696	1548576	+			IAQ61_000911	KAH9880617.1	256	hypothetical protein IAQ61_000911
Un	JACTNS010000003.1	1548652	1549643	-			IAQ61_000912	KAH9880618.1	179	hypothetical protein IAQ61_000912
Un	JACTNS010000003.1	1551139	1552794	-			IAQ61_000913	KAH9880619.1	551	hypothetical protein IAQ61_000913
Un	JACTNS010000003.1	1553006	1554576	-			IAQ61_000914	KAH9880620.1	362	hypothetical protein IAQ61_000914
Un	JACTNS010000003.1	1558996	1559657	-		UBC11	IAQ61_000915	KAH9880621.1	157	Ubiquitin-conjugating enzyme E2 11
Un	JACTNS010000003.1	1559941	1560150	-			IAQ61_000916	KAH9880622.1	69	hypothetical protein IAQ61_000916
Un	JACTNS010000003.1	1560499	1561237	-			IAQ61_000917	KAH9880623.1	170	hypothetical protein IAQ61_000917
Un	JACTNS010000003.1	1562822	1563719	-			IAQ61_000918	KAH9880624.1	283	hypothetical protein IAQ61_000918
Un	JACTNS010000003.1	1564602	1565816	+			IAQ61_000919	KAH9880625.1	369	hypothetical protein IAQ61_000919
Un	JACTNS010000003.1	1566619	1568468	+			IAQ61_000920	KAH9880626.1	582	hypothetical protein IAQ61_000920
Un	JACTNS010000003.1	1570147	1571277	+			IAQ61_000921	KAH9880627.1	376	hypothetical protein IAQ61_000921
Un	JACTNS010000003.1	1571336	1572362	-			IAQ61_000922	KAH9880628.1	309	hypothetical protein IAQ61_000922
Un	JACTNS010000003.1	1574020	1579503	+			IAQ61_000923	KAH9880629.1	1512	hypothetical protein IAQ61_000923, partial
Un	JACTNS010000003.1	1580154	1581997	-			IAQ61_000924	KAH9880630.1	485	hypothetical protein IAQ61_000924
Un	JACTNS010000003.1	1582379	1582618	-			IAQ61_000925	KAH9880631.1	79	hypothetical protein IAQ61_000925
Un	JACTNS010000003.1	1582870	1588291	+			IAQ61_000926	KAH9880632.1	1737	hypothetical protein IAQ61_000926
Un	JACTNS010000003.1	1589536	1589859	-			IAQ61_000927	KAH9880633.1	107	hypothetical protein IAQ61_000927
Un	JACTNS010000003.1	1590147	1591389	-			IAQ61_000928	KAH9880634.1	373	hypothetical protein IAQ61_000928
Un	JACTNS010000003.1	1592172	1594835	+			IAQ61_000929	KAH9880635.1	853	hypothetical protein IAQ61_000929
Un	JACTNS010000003.1	1595750	1597438	-			IAQ61_000930	KAH9880636.1	562	hypothetical protein IAQ61_000930
Un	JACTNS010000003.1	1597917	1598820	-			IAQ61_000931	KAH9880637.1	256	hypothetical protein IAQ61_000931
Un	JACTNS010000003.1	1599199	1600061	-			IAQ61_000932	KAH9880638.1	270	hypothetical protein IAQ61_000932
Un	JACTNS010000003.1	1600994	1601458	-			IAQ61_000933	KAH9880639.1	154	hypothetical protein IAQ61_000933
Un	JACTNS010000003.1	1601508	1601774	+			IAQ61_000934	KAH9880640.1	88	hypothetical protein IAQ61_000934
Un	JACTNS010000003.1	1602481	1603239	+			IAQ61_000935	KAH9880641.1	252	hypothetical protein IAQ61_000935
Un	JACTNS010000003.1	1603997	1605970	+			IAQ61_000936	KAH9880642.1	657	hypothetical protein IAQ61_000936
Un	JACTNS010000003.1	1606528	1608813	-			IAQ61_000937	KAH9880643.1	683	hypothetical protein IAQ61_000937
Un	JACTNS010000003.1	1610060	1610818	-			IAQ61_000938	KAH9880644.1	252	hypothetical protein IAQ61_000938
Un	JACTNS010000003.1	1613121	1616028	-			IAQ61_000939	KAH9880645.1	891	hypothetical protein IAQ61_000939, partial
Un	JACTNS010000003.1	1616027	1618212	+			IAQ61_000940	KAH9880646.1	637	hypothetical protein IAQ61_000940
Un	JACTNS010000003.1	1619174	1620933	-			IAQ61_000941	KAH9880647.1	570	hypothetical protein IAQ61_000941, partial
Un	JACTNS010000003.1	1622454	1623412	+			IAQ61_000942	KAH9880648.1	269	hypothetical protein IAQ61_000942, partial
Un	JACTNS010000003.1	1623772	1624526	-			IAQ61_000943	KAH9880649.1	193	hypothetical protein IAQ61_000943
Un	JACTNS010000003.1	1624843	1626535	+			IAQ61_000944	KAH9880650.1	484	hypothetical protein IAQ61_000944
Un	JACTNS010000003.1	1630969	1631287	-			IAQ61_000945	KAH9880651.1	72	hypothetical protein IAQ61_000945
Un	JACTNS010000003.1	1633309	1634544	+			IAQ61_000946	KAH9880652.1	189	hypothetical protein IAQ61_000946, partial
Un	JACTNS010000003.1	1634766	1635371	-			IAQ61_000947	KAH9880653.1	96	hypothetical protein IAQ61_000947
Un	JACTNS010000003.1	1635824	1636018	-			IAQ61_000948	KAH9880654.1	64	hypothetical protein IAQ61_000948
Un	JACTNS010000003.1	1637916	1638679	-			IAQ61_000949	KAH9880655.1	171	hypothetical protein IAQ61_000949
Un	JACTNS010000003.1	1642461	1644423	+			IAQ61_000950	KAH9880656.1	554	hypothetical protein IAQ61_000950
Un	JACTNS010000003.1	1644765	1645295	-			IAQ61_000951	KAH9880657.1	176	hypothetical protein IAQ61_000951
Un	JACTNS010000003.1	1645931	1647814	-			IAQ61_000952	KAH9880658.1	587	hypothetical protein IAQ61_000952
Un	JACTNS010000003.1	1648567	1649461	-			IAQ61_000953	KAH9880659.1	210	hypothetical protein IAQ61_000953
Un	JACTNS010000003.1	1649884	1652189	+		DUS3	IAQ61_000954	KAH9880660.1	725	tRNA-dihydrouridine synthase 3
Un	JACTNS010000003.1	1652568	1655224	-			IAQ61_000955	KAH9880661.1	800	hypothetical protein IAQ61_000955, partial
Un	JACTNS010000003.1	1655486	1657185	+			IAQ61_000956	KAH9880662.1	491	hypothetical protein IAQ61_000956
Un	JACTNS010000003.1	1658211	1658953	-			IAQ61_000957	KAH9880663.1	142	hypothetical protein IAQ61_000957, partial
Un	JACTNS010000003.1	1659944	1661877	+			IAQ61_000958	KAH9880664.1	389	hypothetical protein IAQ61_000958
Un	JACTNS010000003.1	1662837	1665791	-			IAQ61_000959	KAH9880665.1	769	hypothetical protein IAQ61_000959, partial
Un	JACTNS010000003.1	1668184	1672563	+			IAQ61_000960	KAH9880666.1	1323	hypothetical protein IAQ61_000960
Un	JACTNS010000003.1	1674067	1677491	+			IAQ61_000961	KAH9880667.1	1064	hypothetical protein IAQ61_000961
Un	JACTNS010000003.1	1677834	1678155	-			IAQ61_000962	KAH9880668.1	85	hypothetical protein IAQ61_000962
Un	JACTNS010000003.1	1678336	1679165	-			IAQ61_000963	KAH9880669.1	255	hypothetical protein IAQ61_000963
Un	JACTNS010000003.1	1681022	1682164	-			IAQ61_000964	KAH9880670.1	345	hypothetical protein IAQ61_000964
Un	JACTNS010000003.1	1683817	1684083	+			IAQ61_000965	KAH9880671.1	65	hypothetical protein IAQ61_000965
Un	JACTNS010000003.1	1684894	1686473	-			IAQ61_000966	KAH9880672.1	508	hypothetical protein IAQ61_000966, partial
Un	JACTNS010000003.1	1688455	1689086	-			IAQ61_000967	KAH9880673.1	183	hypothetical protein IAQ61_000967
Un	JACTNS010000003.1	1690322	1690774	+			IAQ61_000968	KAH9880674.1	150	hypothetical protein IAQ61_000968
Un	JACTNS010000003.1	1691585	1692914	-			IAQ61_000969	KAH9880675.1	426	hypothetical protein IAQ61_000969, partial
Un	JACTNS010000003.1	1693420	1695820	-			IAQ61_000970	KAH9880676.1	782	hypothetical protein IAQ61_000970
Un	JACTNS010000003.1	1696132	1697220	+			IAQ61_000971	KAH9880677.1	362	hypothetical protein IAQ61_000971
Un	JACTNS010000003.1	1701777	1703553	-			IAQ61_000972	KAH9880678.1	488	hypothetical protein IAQ61_000972
Un	JACTNS010000003.1	1705796	1707931	+			IAQ61_000973	KAH9880679.1	599	hypothetical protein IAQ61_000973
Un	JACTNS010000003.1	1708285	1708635	+			IAQ61_000974	KAH9880680.1	116	hypothetical protein IAQ61_000974
Un	JACTNS010000003.1	1709893	1719359	-			IAQ61_000975	KAH9880681.1	3058	hypothetical protein IAQ61_000975
Un	JACTNS010000003.1	1719639	1719875	-			IAQ61_000976	KAH9880682.1	78	hypothetical protein IAQ61_000976
Un	JACTNS010000003.1	1721118	1723386	+			IAQ61_000977	KAH9880683.1	673	hypothetical protein IAQ61_000977
Un	JACTNS010000003.1	1724046	1725371	+			IAQ61_000978	KAH9880684.1	354	hypothetical protein IAQ61_000978
Un	JACTNS010000003.1	1727311	1727664	-			IAQ61_000979	KAH9880685.1	99	hypothetical protein IAQ61_000979
Un	JACTNS010000003.1	1728157	1728733	-			IAQ61_000980	KAH9880686.1	139	hypothetical protein IAQ61_000980
Un	JACTNS010000003.1	1728941	1729210	-			IAQ61_000981	KAH9880687.1	89	hypothetical protein IAQ61_000981
Un	JACTNS010000003.1	1729278	1731380	+			IAQ61_000982	KAH9880688.1	583	hypothetical protein IAQ61_000982, partial
Un	JACTNS010000003.1	1731978	1732410	-			IAQ61_000983	KAH9880689.1	86	hypothetical protein IAQ61_000983, partial
Un	JACTNS010000003.1	1734870	1737125	+			IAQ61_000984	KAH9880690.1	667	hypothetical protein IAQ61_000984
Un	JACTNS010000003.1	1738322	1739327	-		GSP1	IAQ61_000985	KAH9880691.1	218	GTP-binding nuclear protein gsp1/Ran
Un	JACTNS010000003.1	1740209	1741119	-			IAQ61_000986	KAH9880692.1	230	hypothetical protein IAQ61_000986
Un	JACTNS010000003.1	1741536	1741886	-			IAQ61_000987	KAH9880693.1	116	hypothetical protein IAQ61_000987
Un	JACTNS010000003.1	1742074	1745495	+			IAQ61_000988	KAH9880694.1	1061	hypothetical protein IAQ61_000988
Un	JACTNS010000003.1	1746359	1746864	+			IAQ61_000989	KAH9880695.1	114	hypothetical protein IAQ61_000989
Un	JACTNS010000003.1	1750434	1751905	+			IAQ61_000990	KAH9880696.1	455	hypothetical protein IAQ61_000990
Un	JACTNS010000003.1	1752514	1754570	+			IAQ61_000991	KAH9880697.1	659	hypothetical protein IAQ61_000991
Un	JACTNS010000003.1	1755361	1757726	-			IAQ61_000992	KAH9880698.1	755	hypothetical protein IAQ61_000992
Un	JACTNS010000003.1	1759366	1766040	-			IAQ61_000993	KAH9880699.1	2181	hypothetical protein IAQ61_000993
Un	JACTNS010000003.1	1766910	1768753	+			IAQ61_000994	KAH9880700.1	579	hypothetical protein IAQ61_000994
Un	JACTNS010000003.1	1770335	1772452	-			IAQ61_000995	KAH9880701.1	705	hypothetical protein IAQ61_000995
Un	JACTNS010000003.1	1773750	1775146	+			IAQ61_000996	KAH9880702.1	415	hypothetical protein IAQ61_000996
Un	JACTNS010000003.1	1776081	1778489	-			IAQ61_000997	KAH9880703.1	802	hypothetical protein IAQ61_000997
Un	JACTNS010000003.1	1921740	1925310	+			IAQ61_000998	KAH9880704.1	1161	hypothetical protein IAQ61_000998
Un	JACTNS010000003.1	1925618	1926586	+			IAQ61_000999	KAH9880705.1	322	hypothetical protein IAQ61_000999
Un	JACTNS010000003.1	1927068	1927637	-			IAQ61_001000	KAH9880706.1	168	hypothetical protein IAQ61_001000
Un	JACTNS010000003.1	1928286	1929074	+			IAQ61_001001	KAH9880707.1	262	hypothetical protein IAQ61_001001
Un	JACTNS010000003.1	1929145	1929966	-			IAQ61_001002	KAH9880708.1	273	hypothetical protein IAQ61_001002
Un	JACTNS010000003.1	1933734	1934415	+			IAQ61_001003	KAH9880709.1	100	hypothetical protein IAQ61_001003, partial
Un	JACTNS010000003.1	1935180	1935980	+			IAQ61_001004	KAH9880710.1	266	hypothetical protein IAQ61_001004
Un	JACTNS010000003.1	1937265	1938876	+			IAQ61_001005	KAH9880711.1	482	hypothetical protein IAQ61_001005
Un	JACTNS010000003.1	1939815	1940255	+			IAQ61_001006	KAH9880712.1	146	hypothetical protein IAQ61_001006
Un	JACTNS010000003.1	1940873	1942438	-			IAQ61_001007	KAH9880713.1	521	hypothetical protein IAQ61_001007
Un	JACTNS010000003.1	1943046	1944688	+			IAQ61_001008	KAH9880714.1	522	hypothetical protein IAQ61_001008
Un	JACTNS010000003.1	1945975	1946395	+			IAQ61_001009	KAH9880715.1	116	hypothetical protein IAQ61_001009
Un	JACTNS010000003.1	1947677	1950101	+			IAQ61_001010	KAH9880716.1	552	hypothetical protein IAQ61_001010
Un	JACTNS010000003.1	1952267	1952817	+			IAQ61_001011	KAH9880717.1	121	hypothetical protein IAQ61_001011
Un	JACTNS010000003.1	1954600	1959157	+			IAQ61_001012	KAH9880718.1	699	hypothetical protein IAQ61_001012
Un	JACTNS010000003.1	1960150	1961363	-			IAQ61_001013	KAH9880719.1	317	hypothetical protein IAQ61_001013, partial
Un	JACTNS010000003.1	1961629	1962235	+			IAQ61_001014	KAH9880720.1	89	hypothetical protein IAQ61_001014
Un	JACTNS010000003.1	1963403	1964065	+			IAQ61_001015	KAH9880721.1	220	hypothetical protein IAQ61_001015
Un	JACTNS010000003.1	1964725	1965663	+			IAQ61_001016	KAH9880722.1	278	hypothetical protein IAQ61_001016
Un	JACTNS010000003.1	1966323	1967813	+			IAQ61_001017	KAH9880723.1	496	hypothetical protein IAQ61_001017
Un	JACTNS010000003.1	1969386	1972184	+			IAQ61_001018	KAH9880724.1	932	hypothetical protein IAQ61_001018
Un	JACTNS010000003.1	1972262	1972633	+			IAQ61_001019	KAH9880725.1	123	hypothetical protein IAQ61_001019
Un	JACTNS010000003.1	1972939	1975040	-			IAQ61_001020	KAH9880726.1	662	hypothetical protein IAQ61_001020
Un	JACTNS010000003.1	1977375	1979065	-		GCN5	IAQ61_001021	KAH9880727.1	415	histone acetyltransferase
Un	JACTNS010000003.1	1979496	1979924	+			IAQ61_001022	KAH9880728.1	79	hypothetical protein IAQ61_001022
Un	JACTNS010000003.1	1980110	1981372	+			IAQ61_001023	KAH9880729.1	404	hypothetical protein IAQ61_001023
Un	JACTNS010000003.1	1982138	1983766	-			IAQ61_001024	KAH9880730.1	381	hypothetical protein IAQ61_001024, partial
Un	JACTNS010000003.1	1983922	1984176	+			IAQ61_001025	KAH9880731.1	84	hypothetical protein IAQ61_001025
Un	JACTNS010000003.1	1984351	1986831	-			IAQ61_001026	KAH9880732.1	627	hypothetical protein IAQ61_001026
Un	JACTNS010000003.1	1987916	1990370	-			IAQ61_001027	KAH9880733.1	778	hypothetical protein IAQ61_001027, partial
Un	JACTNS010000003.1	1990949	1991525	-			IAQ61_001028	KAH9880734.1	174	hypothetical protein IAQ61_001028
Un	JACTNS010000003.1	1992696	1997777	-			IAQ61_001029	KAH9880735.1	1469	hypothetical protein IAQ61_001029, partial
Un	JACTNS010000003.1	2000607	2002341	+			IAQ61_001030	KAH9880736.1	429	hypothetical protein IAQ61_001030, partial
Un	JACTNS010000003.1	2002572	2003111	+			IAQ61_001031	KAH9880737.1	155	hypothetical protein IAQ61_001031
Un	JACTNS010000003.1	2003933	2005553	+			IAQ61_001032	KAH9880738.1	517	hypothetical protein IAQ61_001032
Un	JACTNS010000003.1	2008862	2010987	+			IAQ61_001033	KAH9880739.1	365	hypothetical protein IAQ61_001033
Un	JACTNS010000003.1	2012538	2014008	-			IAQ61_001034	KAH9880740.1	385	hypothetical protein IAQ61_001034
Un	JACTNS010000003.1	2014625	2014870	+			IAQ61_001035	KAH9880741.1	81	hypothetical protein IAQ61_001035
Un	JACTNS010000003.1	2015031	2015330	+			IAQ61_001036	KAH9880742.1	99	hypothetical protein IAQ61_001036
Un	JACTNS010000003.1	2018572	2019132	-			IAQ61_001037	KAH9880743.1	186	hypothetical protein IAQ61_001037
Un	JACTNS010000003.1	2019850	2021707	-			IAQ61_001038	KAH9880744.1	480	hypothetical protein IAQ61_001038
Un	JACTNS010000003.1	2022556	2024185	+			IAQ61_001039	KAH9880745.1	525	hypothetical protein IAQ61_001039
Un	JACTNS010000003.1	2026598	2026873	+			IAQ61_001040	KAH9880746.1	91	hypothetical protein IAQ61_001040
Un	JACTNS010000003.1	2028031	2030418	-			IAQ61_001041	KAH9880747.1	683	hypothetical protein IAQ61_001041
Un	JACTNS010000003.1	2031943	2032137	-			IAQ61_001042	KAH9880748.1	64	hypothetical protein IAQ61_001042
Un	JACTNS010000003.1	2032245	2033033	-			IAQ61_001043	KAH9880749.1	192	hypothetical protein IAQ61_001043
Un	JACTNS010000003.1	2033383	2034733	+			IAQ61_001044	KAH9880750.1	358	hypothetical protein IAQ61_001044
Un	JACTNS010000003.1	2035303	2035614	+			IAQ61_001045	KAH9880751.1	86	hypothetical protein IAQ61_001045
Un	JACTNS010000003.1	2036146	2037483	+			IAQ61_001046	KAH9880752.1	425	hypothetical protein IAQ61_001046
Un	JACTNS010000003.1	2038582	2040492	-			IAQ61_001047	KAH9880753.1	562	hypothetical protein IAQ61_001047, partial
Un	JACTNS010000003.1	2042150	2044323	-			IAQ61_001048	KAH9880754.1	535	hypothetical protein IAQ61_001048
Un	JACTNS010000003.1	2044466	2046436	+			IAQ61_001049	KAH9880755.1	536	hypothetical protein IAQ61_001049
Un	JACTNS010000003.1	2047111	2050446	+			IAQ61_001050	KAH9880756.1	1111	hypothetical protein IAQ61_001050
Un	JACTNS010000003.1	2050588	2052873	-			IAQ61_001051	KAH9880757.1	761	hypothetical protein IAQ61_001051
Un	JACTNS010000003.1	2053395	2053893	-			IAQ61_001052	KAH9880758.1	142	hypothetical protein IAQ61_001052
Un	JACTNS010000003.1	2054056	2054322	-			IAQ61_001053	KAH9880759.1	88	hypothetical protein IAQ61_001053
Un	JACTNS010000003.1	2058204	2059118	+			IAQ61_001054	KAH9880760.1	227	hypothetical protein IAQ61_001054, partial
Un	JACTNS010000003.1	2062034	2063837	+			IAQ61_001055	KAH9880761.1	492	hypothetical protein IAQ61_001055
Un	JACTNS010000003.1	2067484	2068128	+			IAQ61_001056	KAH9880762.1	174	hypothetical protein IAQ61_001056
Un	JACTNS010000003.1	2068228	2068632	+			IAQ61_001057	KAH9880763.1	134	hypothetical protein IAQ61_001057
Un	JACTNS010000003.1	2070758	2071096	-			IAQ61_001058	KAH9880764.1	112	hypothetical protein IAQ61_001058
Un	JACTNS010000003.1	2071920	2072877	-		DHG2	IAQ61_001059	KAH9880765.1	285	L-rhamnose-1-dehydrogenase
Un	JACTNS010000003.1	2073229	2077153	+			IAQ61_001060	KAH9880766.1	532	hypothetical protein IAQ61_001060
Un	JACTNS010000003.1	2077342	2079108	-			IAQ61_001061	KAH9880767.1	540	hypothetical protein IAQ61_001061
Un	JACTNS010000003.1	2079689	2083654	+			IAQ61_001062	KAH9880768.1	1321	hypothetical protein IAQ61_001062
Un	JACTNS010000003.1	2084453	2084857	+			IAQ61_001063	KAH9880769.1	134	hypothetical protein IAQ61_001063
Un	JACTNS010000003.1	2085906	2087613	-			IAQ61_001064	KAH9880770.1	533	hypothetical protein IAQ61_001064
Un	JACTNS010000003.1	2087863	2088258	+			IAQ61_001065	KAH9880771.1	89	hypothetical protein IAQ61_001065
Un	JACTNS010000003.1	2089264	2089596	-			IAQ61_001066	KAH9880772.1	110	hypothetical protein IAQ61_001066
Un	JACTNS010000003.1	2089612	2091932	+			IAQ61_001067	KAH9880773.1	729	hypothetical protein IAQ61_001067
Un	JACTNS010000003.1	2092788	2093710	-			IAQ61_001068	KAH9880774.1	282	hypothetical protein IAQ61_001068
Un	JACTNS010000003.1	2095064	2096890	-			IAQ61_001069	KAH9880775.1	608	hypothetical protein IAQ61_001069
Un	JACTNS010000003.1	2097172	2099544	+			IAQ61_001070	KAH9880776.1	790	hypothetical protein IAQ61_001070
Un	JACTNS010000003.1	2100599	2101132	-			IAQ61_001071	KAH9880777.1	177	hypothetical protein IAQ61_001071
Un	JACTNS010000003.1	2143846	2144777	-			IAQ61_001072	KAH9880778.1	252	hypothetical protein IAQ61_001072
Un	JACTNS010000003.1	2145335	2146338	+			IAQ61_001073	KAH9880779.1	290	hypothetical protein IAQ61_001073
Un	JACTNS010000003.1	2146859	2149039	-			IAQ61_001074	KAH9880780.1	668	hypothetical protein IAQ61_001074
Un	JACTNS010000003.1	2149668	2150148	-			IAQ61_001075	KAH9880781.1	81	hypothetical protein IAQ61_001075
Un	JACTNS010000003.1	2150847	2152357	-			IAQ61_001076	KAH9880782.1	466	hypothetical protein IAQ61_001076
Un	JACTNS010000003.1	2153104	2154231	+			IAQ61_001077	KAH9880783.1	339	hypothetical protein IAQ61_001077
Un	JACTNS010000003.1	2154753	2158493	+		RPB2	IAQ61_001078	KAH9880784.1	1246	DNA-dependent RNA polymerase II
Un	JACTNS010000003.1	2159567	2161191	-		CYP6	IAQ61_001079	KAH9880785.1	502	Peptidyl-prolyl cis-trans isomerase cyp6, partial
Un	JACTNS010000003.1	2162417	2162659	-			IAQ61_001080	KAH9880786.1	80	hypothetical protein IAQ61_001080
Un	JACTNS010000003.1	2163945	2165630	+			IAQ61_001081	KAH9880787.1	462	hypothetical protein IAQ61_001081
Un	JACTNS010000003.1	2166912	2167361	+			IAQ61_001082	KAH9880788.1	149	hypothetical protein IAQ61_001082
Un	JACTNS010000003.1	2168472	2168942	-			IAQ61_001083	KAH9880789.1	82	hypothetical protein IAQ61_001083
Un	JACTNS010000003.1	2169333	2173178	+			IAQ61_001084	KAH9880790.1	940	hypothetical protein IAQ61_001084
Un	JACTNS010000003.1	2175976	2177536	+			IAQ61_001085	KAH9880791.1	467	hypothetical protein IAQ61_001085
Un	JACTNS010000003.1	2178708	2179688	-			IAQ61_001086	KAH9880792.1	307	hypothetical protein IAQ61_001086, partial
Un	JACTNS010000003.1	2181537	2185243	-			IAQ61_001087	KAH9880793.1	1174	hypothetical protein IAQ61_001087
Un	JACTNS010000003.1	2185808	2186068	-			IAQ61_001088	KAH9880794.1	86	hypothetical protein IAQ61_001088
Un	JACTNS010000003.1	2187460	2188704	-			IAQ61_001089	KAH9880795.1	356	hypothetical protein IAQ61_001089
Un	JACTNS010000003.1	2189564	2190532	+			IAQ61_001090	KAH9880796.1	322	hypothetical protein IAQ61_001090
Un	JACTNS010000003.1	2190607	2190999	-			IAQ61_001091	KAH9880797.1	106	hypothetical protein IAQ61_001091
Un	JACTNS010000003.1	2191681	2192877	-			IAQ61_001092	KAH9880798.1	398	hypothetical protein IAQ61_001092
Un	JACTNS010000003.1	2193653	2195695	-			IAQ61_001093	KAH9880799.1	622	hypothetical protein IAQ61_001093
Un	JACTNS010000003.1	2196729	2198109	-			IAQ61_001094	KAH9880800.1	441	hypothetical protein IAQ61_001094
Un	JACTNS010000003.1	2198818	2199117	+			IAQ61_001095	KAH9880801.1	99	hypothetical protein IAQ61_001095
Un	JACTNS010000003.1	2199605	2200038	+			IAQ61_001096	KAH9880802.1	73	hypothetical protein IAQ61_001096
Un	JACTNS010000003.1	2200743	2205381	+			IAQ61_001097	KAH9880803.1	1438	hypothetical protein IAQ61_001097
Un	JACTNS010000003.1	2206820	2208069	-			IAQ61_001098	KAH9880804.1	320	hypothetical protein IAQ61_001098
Un	JACTNS010000003.1	2208419	2209090	-			IAQ61_001099	KAH9880805.1	223	hypothetical protein IAQ61_001099
Un	JACTNS010000003.1	2209889	2212950	-			IAQ61_001100	KAH9880806.1	973	hypothetical protein IAQ61_001100
Un	JACTNS010000003.1	2220406	2222426	-			IAQ61_001101	KAH9880807.1	620	hypothetical protein IAQ61_001101
Un	JACTNS010000003.1	2223257	2225767	-			IAQ61_001102	KAH9880808.1	836	hypothetical protein IAQ61_001102
Un	JACTNS010000003.1	2227034	2227847	+			IAQ61_001103	KAH9880809.1	239	hypothetical protein IAQ61_001103
Un	JACTNS010000003.1	2228117	2228344	-			IAQ61_001104	KAH9880810.1	75	hypothetical protein IAQ61_001104
Un	JACTNS010000003.1	2229405	2231309	+			IAQ61_001105	KAH9880811.1	542	hypothetical protein IAQ61_001105
Un	JACTNS010000003.1	2232510	2232987	+			IAQ61_001106	KAH9880812.1	135	hypothetical protein IAQ61_001106
Un	JACTNS010000003.1	2234967	2236310	+			IAQ61_001107	KAH9880813.1	447	hypothetical protein IAQ61_001107
Un	JACTNS010000003.1	2238834	2244063	-			IAQ61_001108	KAH9880814.1	1707	hypothetical protein IAQ61_001108
Un	JACTNS010000003.1	2244457	2244885	+			IAQ61_001109	KAH9880815.1	99	hypothetical protein IAQ61_001109
Un	JACTNS010000003.1	2245195	2246668	-			IAQ61_001110	KAH9880816.1	437	hypothetical protein IAQ61_001110
Un	JACTNS010000003.1	2247286	2248452	-			IAQ61_001111	KAH9880817.1	368	hypothetical protein IAQ61_001111
Un	JACTNS010000003.1	2249031	2250717	-			IAQ61_001112	KAH9880818.1	545	hypothetical protein IAQ61_001112
Un	JACTNS010000003.1	2251058	2251312	+			IAQ61_001113	KAH9880819.1	84	hypothetical protein IAQ61_001113
Un	JACTNS010000003.1	2251900	2253131	+			IAQ61_001114	KAH9880820.1	254	hypothetical protein IAQ61_001114
Un	JACTNS010000003.1	2253802	2254427	-			IAQ61_001115	KAH9880821.1	82	hypothetical protein IAQ61_001115
Un	JACTNS010000003.1	2255040	2255640	+			IAQ61_001116	KAH9880822.1	102	hypothetical protein IAQ61_001116
Un	JACTNS010000003.1	2255846	2256961	-			IAQ61_001117	KAH9880823.1	327	hypothetical protein IAQ61_001117
Un	JACTNS010000003.1	2258851	2263891	+			IAQ61_001118	KAH9880824.1	1578	hypothetical protein IAQ61_001118
Un	JACTNS010000003.1	2264989	2265655	-			IAQ61_001119	KAH9880825.1	203	hypothetical protein IAQ61_001119
Un	JACTNS010000003.1	2276220	2278004	-		LAE1	IAQ61_001120	KAH9880826.1	305	Secondary metabolism regulator lae1
Un	JACTNS010000003.1	2281043	2282620	+			IAQ61_001121	KAH9880827.1	399	hypothetical protein IAQ61_001121, partial
Un	JACTNS010000003.1	2283216	2283472	+			IAQ61_001122	KAH9880828.1	66	hypothetical protein IAQ61_001122
Un	JACTNS010000003.1	2283540	2284803	-			IAQ61_001123	KAH9880829.1	360	hypothetical protein IAQ61_001123
Un	JACTNS010000003.1	2285274	2285540	-			IAQ61_001124	KAH9880830.1	88	hypothetical protein IAQ61_001124
Un	JACTNS010000003.1	2285779	2288740	-			IAQ61_001125	KAH9880831.1	956	hypothetical protein IAQ61_001125
Un	JACTNS010000003.1	2289172	2290151	-			IAQ61_001126	KAH9880832.1	296	hypothetical protein IAQ61_001126
Un	JACTNS010000003.1	2291045	2292368	-			IAQ61_001127	KAH9880833.1	370	hypothetical protein IAQ61_001127
Un	JACTNS010000003.1	2293239	2294699	-			IAQ61_001128	KAH9880834.1	486	hypothetical protein IAQ61_001128
Un	JACTNS010000003.1	2295372	2297046	-			IAQ61_001129	KAH9880835.1	537	hypothetical protein IAQ61_001129
Un	JACTNS010000003.1	2297794	2298033	+			IAQ61_001130	KAH9880836.1	79	hypothetical protein IAQ61_001130
Un	JACTNS010000003.1	2298627	2300299	-			IAQ61_001131	KAH9880837.1	505	hypothetical protein IAQ61_001131
Un	JACTNS010000003.1	2300817	2302509	+			IAQ61_001132	KAH9880838.1	508	hypothetical protein IAQ61_001132
Un	JACTNS010000003.1	2304360	2305191	+			IAQ61_001133	KAH9880839.1	119	hypothetical protein IAQ61_001133, partial
Un	JACTNS010000003.1	2306677	2308164	+			IAQ61_001134	KAH9880840.1	495	hypothetical protein IAQ61_001134
Un	JACTNS010000003.1	2308837	2310991	-			IAQ61_001135	KAH9880841.1	680	hypothetical protein IAQ61_001135
Un	JACTNS010000003.1	2312065	2313605	+			IAQ61_001136	KAH9880842.1	479	hypothetical protein IAQ61_001136
Un	JACTNS010000003.1	2313986	2315425	-			IAQ61_001137	KAH9880843.1	452	hypothetical protein IAQ61_001137
Un	JACTNS010000003.1	2316103	2318786	-		HIS3	IAQ61_001138	KAH9880844.1	876	imidazoleglycerol-phosphate dehydratase
Un	JACTNS010000003.1	2319400	2320755	+			IAQ61_001139	KAH9880845.1	387	hypothetical protein IAQ61_001139
Un	JACTNS010000003.1	2320983	2323377	-			IAQ61_001140	KAH9880846.1	764	hypothetical protein IAQ61_001140
Un	JACTNS010000003.1	2323744	2324584	+			IAQ61_001141	KAH9880847.1	235	hypothetical protein IAQ61_001141
Un	JACTNS010000003.1	2324830	2325957	+			IAQ61_001142	KAH9880848.1	356	hypothetical protein IAQ61_001142
Un	JACTNS010000003.1	2326412	2327678	+			IAQ61_001143	KAH9880849.1	358	hypothetical protein IAQ61_001143
Un	JACTNS010000003.1	2328396	2328973	-			IAQ61_001144	KAH9880850.1	146	hypothetical protein IAQ61_001144
Un	JACTNS010000003.1	2330719	2331882	+			IAQ61_001145	KAH9880851.1	166	hypothetical protein IAQ61_001145
Un	JACTNS010000003.1	2332435	2334252	+			IAQ61_001146	KAH9880852.1	552	hypothetical protein IAQ61_001146
Un	JACTNS010000003.1	2334719	2335916	-		ARD1_2	IAQ61_001147	KAH9880853.1	371	N-terminal acetyltransferase A complex catalytic subunit ard1
Un	JACTNS010000003.1	2336581	2338402	-			IAQ61_001148	KAH9880854.1	564	hypothetical protein IAQ61_001148
Un	JACTNS010000003.1	2338692	2341349	-			IAQ61_001149	KAH9880855.1	826	hypothetical protein IAQ61_001149
Un	JACTNS010000003.1	2341874	2344284	-			IAQ61_001150	KAH9880856.1	721	hypothetical protein IAQ61_001150
Un	JACTNS010000003.1	2344496	2344813	+			IAQ61_001151	KAH9880857.1	105	hypothetical protein IAQ61_001151
Un	JACTNS010000003.1	2346584	2348230	+			IAQ61_001152	KAH9880858.1	548	hypothetical protein IAQ61_001152
Un	JACTNS010000003.1	2349165	2349395	-			IAQ61_001153	KAH9880859.1	76	hypothetical protein IAQ61_001153
Un	JACTNS010000003.1	2349643	2352135	+			IAQ61_001154	KAH9880860.1	793	hypothetical protein IAQ61_001154
Un	JACTNS010000003.1	2353485	2354192	+			IAQ61_001155	KAH9880861.1	199	hypothetical protein IAQ61_001155
Un	JACTNS010000003.1	2354582	2356300	-			IAQ61_001156	KAH9880862.1	572	hypothetical protein IAQ61_001156
Un	JACTNS010000003.1	2357515	2359517	+			IAQ61_001157	KAH9880863.1	624	hypothetical protein IAQ61_001157
Un	JACTNS010000003.1	2359658	2360074	-			IAQ61_001158	KAH9880864.1	138	hypothetical protein IAQ61_001158
Un	JACTNS010000003.1	2361967	2362956	+			IAQ61_001159	KAH9880865.1	329	hypothetical protein IAQ61_001159
Un	JACTNS010000003.1	2363769	2364649	-			IAQ61_001160	KAH9880866.1	272	hypothetical protein IAQ61_001160
Un	JACTNS010000003.1	2364978	2365240	+			IAQ61_001161	KAH9880867.1	49	hypothetical protein IAQ61_001161, partial
Un	JACTNS010000003.1	2366549	2370046	+			IAQ61_001162	KAH9880868.1	1165	hypothetical protein IAQ61_001162
Un	JACTNS010000003.1	2370937	2371767	+			IAQ61_001163	KAH9880869.1	276	hypothetical protein IAQ61_001163
Un	JACTNS010000003.1	2372980	2373267	+			IAQ61_001164	KAH9880870.1	95	hypothetical protein IAQ61_001164
Un	JACTNS010000003.1	2373344	2374576	+			IAQ61_001165	KAH9880871.1	410	hypothetical protein IAQ61_001165
Un	JACTNS010000003.1	2375717	2377492	+			IAQ61_001166	KAH9880872.1	591	hypothetical protein IAQ61_001166
Un	JACTNS010000003.1	2377864	2380065	-			IAQ61_001167	KAH9880873.1	604	hypothetical protein IAQ61_001167, partial
Un	JACTNS010000003.1	2380709	2381399	+			IAQ61_001168	KAH9880874.1	203	hypothetical protein IAQ61_001168, partial
Un	JACTNS010000003.1	2381564	2382953	+			IAQ61_001169	KAH9880875.1	445	hypothetical protein IAQ61_001169
Un	JACTNS010000003.1	2383060	2383483	+			IAQ61_001170	KAH9880876.1	106	hypothetical protein IAQ61_001170
Un	JACTNS010000003.1	2383828	2385171	+			IAQ61_001171	KAH9880877.1	447	hypothetical protein IAQ61_001171
Un	JACTNS010000003.1	2385656	2386522	-			IAQ61_001172	KAH9880878.1	288	hypothetical protein IAQ61_001172
Un	JACTNS010000003.1	2386880	2388083	+			IAQ61_001173	KAH9880879.1	355	hypothetical protein IAQ61_001173
Un	JACTNS010000003.1	2389542	2391072	+			IAQ61_001174	KAH9880880.1	454	hypothetical protein IAQ61_001174
Un	JACTNS010000003.1	2403879	2404990	+		MCR1	IAQ61_001175	KAH9880881.1	352	NADH-cytochrome b5 reductase
Un	JACTNS010000003.1	2405898	2407095	-			IAQ61_001176	KAH9880882.1	306	hypothetical protein IAQ61_001176, partial
Un	JACTNS010000003.1	2407721	2409675	-			IAQ61_001177	KAH9880883.1	557	hypothetical protein IAQ61_001177
Un	JACTNS010000003.1	2491655	2494353	+			IAQ61_001178	KAH9880884.1	860	hypothetical protein IAQ61_001178
Un	JACTNS010000003.1	2494788	2496069	-			IAQ61_001179	KAH9880885.1	391	hypothetical protein IAQ61_001179
Un	JACTNS010000003.1	2496525	2497943	-			IAQ61_001180	KAH9880886.1	472	hypothetical protein IAQ61_001180
Un	JACTNS010000003.1	2498427	2500721	-			IAQ61_001181	KAH9880887.1	694	hypothetical protein IAQ61_001181
Un	JACTNS010000003.1	2501201	2502505	-			IAQ61_001182	KAH9880888.1	434	hypothetical protein IAQ61_001182
Un	JACTNS010000003.1	2502662	2502868	-			IAQ61_001183	KAH9880889.1	68	hypothetical protein IAQ61_001183
Un	JACTNS010000003.1	2503042	2504721	+			IAQ61_001184	KAH9880890.1	536	hypothetical protein IAQ61_001184
Un	JACTNS010000003.1	2505272	2505865	-			IAQ61_001185	KAH9880891.1	160	hypothetical protein IAQ61_001185
Un	JACTNS010000003.1	2506524	2511602	+			IAQ61_001186	KAH9880892.1	1692	hypothetical protein IAQ61_001186
Un	JACTNS010000003.1	2512633	2514151	-			IAQ61_001187	KAH9880893.1	407	hypothetical protein IAQ61_001187
Un	JACTNS010000003.1	2514938	2515489	-			IAQ61_001188	KAH9880894.1	183	hypothetical protein IAQ61_001188
Un	JACTNS010000003.1	2516297	2520587	-			IAQ61_001189	KAH9880895.1	1368	hypothetical protein IAQ61_001189
Un	JACTNS010000003.1	2521095	2521665	+			IAQ61_001190	KAH9880896.1	157	hypothetical protein IAQ61_001190
Un	JACTNS010000003.1	2522315	2522695	+			IAQ61_001191	KAH9880897.1	126	hypothetical protein IAQ61_001191
Un	JACTNS010000003.1	2523138	2524438	+			IAQ61_001192	KAH9880898.1	367	hypothetical protein IAQ61_001192, partial
Un	JACTNS010000003.1	2524886	2526751	-			IAQ61_001193	KAH9880899.1	621	hypothetical protein IAQ61_001193
Un	JACTNS010000003.1	2527275	2528897	+			IAQ61_001194	KAH9880900.1	540	hypothetical protein IAQ61_001194
Un	JACTNS010000003.1	2529345	2529989	+			IAQ61_001195	KAH9880901.1	214	hypothetical protein IAQ61_001195
Un	JACTNS010000003.1	2530734	2531495	+			IAQ61_001196	KAH9880902.1	253	hypothetical protein IAQ61_001196
Un	JACTNS010000003.1	2532221	2532505	+			IAQ61_001197	KAH9880903.1	94	hypothetical protein IAQ61_001197
Un	JACTNS010000003.1	2532950	2533744	-			IAQ61_001198	KAH9880904.1	264	hypothetical protein IAQ61_001198
Un	JACTNS010000003.1	2533993	2536092	-			IAQ61_001199	KAH9880905.1	616	hypothetical protein IAQ61_001199
Un	JACTNS010000003.1	2538456	2540204	+			IAQ61_001200	KAH9880906.1	539	hypothetical protein IAQ61_001200
Un	JACTNS010000003.1	2541423	2542430	+			IAQ61_001201	KAH9880907.1	335	hypothetical protein IAQ61_001201
Un	JACTNS010000003.1	2542630	2543070	+			IAQ61_001202	KAH9880908.1	146	hypothetical protein IAQ61_001202
Un	JACTNS010000003.1	2544274	2546538	+			IAQ61_001203	KAH9880909.1	754	hypothetical protein IAQ61_001203
Un	JACTNS010000003.1	2548810	2549494	+			IAQ61_001204	KAH9880910.1	192	hypothetical protein IAQ61_001204
Un	JACTNS010000003.1	2549717	2551304	-			IAQ61_001205	KAH9880911.1	437	hypothetical protein IAQ61_001205
Un	JACTNS010000003.1	2552917	2554058	+			IAQ61_001206	KAH9880912.1	336	hypothetical protein IAQ61_001206
Un	JACTNS010000003.1	2555166	2556254	+			IAQ61_001207	KAH9880913.1	184	hypothetical protein IAQ61_001207, partial
Un	JACTNS010000003.1	2557280	2560812	-			IAQ61_001208	KAH9880914.1	1141	hypothetical protein IAQ61_001208
Un	JACTNS010000003.1	2564347	2566195	-			IAQ61_001209	KAH9880915.1	583	hypothetical protein IAQ61_001209
Un	JACTNS010000003.1	2566463	2567102	+			IAQ61_001210	KAH9880916.1	177	hypothetical protein IAQ61_001210
Un	JACTNS010000003.1	2568130	2569458	+			IAQ61_001211	KAH9880917.1	442	hypothetical protein IAQ61_001211
Un	JACTNS010000003.1	2570546	2571235	+			IAQ61_001212	KAH9880918.1	229	hypothetical protein IAQ61_001212
Un	JACTNS010000003.1	2572319	2572816	-			IAQ61_001213	KAH9880919.1	165	hypothetical protein IAQ61_001213
Un	JACTNS010000003.1	2572961	2574004	-			IAQ61_001214	KAH9880920.1	212	hypothetical protein IAQ61_001214
Un	JACTNS010000003.1	2574425	2575798	+			IAQ61_001215	KAH9880921.1	457	hypothetical protein IAQ61_001215
Un	JACTNS010000003.1	2577148	2579067	+			IAQ61_001216	KAH9880922.1	639	hypothetical protein IAQ61_001216
Un	JACTNS010000003.1	2579665	2580555	+			IAQ61_001217	KAH9880923.1	296	hypothetical protein IAQ61_001217
Un	JACTNS010000003.1	2581733	2582401	+		SCD1	IAQ61_001218	KAH9880924.1	187	Scytalone dehydratase
Un	JACTNS010000003.1	2583284	2583984	-			IAQ61_001219	KAH9880925.1	130	hypothetical protein IAQ61_001219, partial
Un	JACTNS010000003.1	2584641	2585968	+			IAQ61_001220	KAH9880926.1	159	hypothetical protein IAQ61_001220
Un	JACTNS010000003.1	2586076	2587638	+			IAQ61_001221	KAH9880927.1	408	hypothetical protein IAQ61_001221
Un	JACTNS010000003.1	2588031	2588788	-			IAQ61_001222	KAH9880928.1	154	hypothetical protein IAQ61_001222
Un	JACTNS010000003.1	2590104	2591834	+			IAQ61_001223	KAH9880929.1	576	hypothetical protein IAQ61_001223
Un	JACTNS010000003.1	2592913	2593367	-			IAQ61_001224	KAH9880930.1	114	hypothetical protein IAQ61_001224
Un	JACTNS010000003.1	2594198	2594829	-			IAQ61_001225	KAH9880931.1	95	hypothetical protein IAQ61_001225
Un	JACTNS010000003.1	2595178	2598025	+			IAQ61_001226	KAH9880932.1	831	hypothetical protein IAQ61_001226
Un	JACTNS010000003.1	2598969	2601928	+			IAQ61_001227	KAH9880933.1	894	hypothetical protein IAQ61_001227
Un	JACTNS010000003.1	2603419	2606352	+		URE1	IAQ61_001228	KAH9880934.1	839	Urease
Un	JACTNS010000003.1	2607718	2609263	+			IAQ61_001229	KAH9880935.1	411	hypothetical protein IAQ61_001229
Un	JACTNS010000003.1	2610152	2611842	+			IAQ61_001230	KAH9880936.1	540	hypothetical protein IAQ61_001230
Un	JACTNS010000003.1	2612668	2613024	-			IAQ61_001231	KAH9880937.1	118	hypothetical protein IAQ61_001231
Un	JACTNS010000003.1	2613174	2617356	+			IAQ61_001232	KAH9880938.1	1377	hypothetical protein IAQ61_001232
Un	JACTNS010000003.1	2618273	2619253	+			IAQ61_001233	KAH9880939.1	276	hypothetical protein IAQ61_001233
Un	JACTNS010000003.1	2620343	2621407	+			IAQ61_001234	KAH9880940.1	354	hypothetical protein IAQ61_001234
Un	JACTNS010000003.1	2622301	2624251	-			IAQ61_001235	KAH9880941.1	488	hypothetical protein IAQ61_001235
Un	JACTNS010000003.1	2624645	2626446	-			IAQ61_001236	KAH9880942.1	480	hypothetical protein IAQ61_001236
Un	JACTNS010000003.1	2626979	2627388	-			IAQ61_001237	KAH9880943.1	100	hypothetical protein IAQ61_001237
Un	JACTNS010000003.1	2627735	2629318	-			IAQ61_001238	KAH9880944.1	495	hypothetical protein IAQ61_001238
Un	JACTNS010000003.1	2631603	2632651	+			IAQ61_001239	KAH9880945.1	331	hypothetical protein IAQ61_001239
Un	JACTNS010000003.1	2634344	2637379	-			IAQ61_001240	KAH9880946.1	1011	hypothetical protein IAQ61_001240
Un	JACTNS010000003.1	2639244	2642490	+			IAQ61_001241	KAH9880947.1	1016	hypothetical protein IAQ61_001241
Un	JACTNS010000003.1	2643408	2644007	+			IAQ61_001242	KAH9880948.1	199	hypothetical protein IAQ61_001242
Un	JACTNS010000003.1	2645043	2645399	+			IAQ61_001243	KAH9880949.1	118	hypothetical protein IAQ61_001243
Un	JACTNS010000003.1	2646245	2647672	+			IAQ61_001244	KAH9880950.1	475	hypothetical protein IAQ61_001244
Un	JACTNS010000003.1	2648956	2650119	-			IAQ61_001245	KAH9880951.1	387	hypothetical protein IAQ61_001245
Un	JACTNS010000003.1	2652555	2653284	+			IAQ61_001246	KAH9880952.1	216	hypothetical protein IAQ61_001246
Un	JACTNS010000003.1	2653844	2654140	+			IAQ61_001247	KAH9880953.1	98	hypothetical protein IAQ61_001247
Un	JACTNS010000003.1	2655802	2657514	+			IAQ61_001248	KAH9880954.1	442	hypothetical protein IAQ61_001248
Un	JACTNS010000003.1	2658253	2659495	+			IAQ61_001249	KAH9880955.1	401	hypothetical protein IAQ61_001249, partial
Un	JACTNS010000003.1	2659969	2660402	+			IAQ61_001250	KAH9880956.1	106	hypothetical protein IAQ61_001250
Un	JACTNS010000003.1	2662141	2662809	+			IAQ61_001251	KAH9880957.1	222	hypothetical protein IAQ61_001251
Un	JACTNS010000003.1	2663586	2664481	+			IAQ61_001252	KAH9880958.1	268	hypothetical protein IAQ61_001252
Un	JACTNS010000003.1	2665754	2667715	+			IAQ61_001253	KAH9880959.1	606	hypothetical protein IAQ61_001253
Un	JACTNS010000003.1	2668292	2669391	-			IAQ61_001254	KAH9880960.1	278	hypothetical protein IAQ61_001254
Un	JACTNS010000004.1	12499	14016	-			IAQ61_001255	KAH9879437.1	488	hypothetical protein IAQ61_001255
Un	JACTNS010000004.1	14193	15261	+			IAQ61_001256	KAH9879438.1	299	hypothetical protein IAQ61_001256
Un	JACTNS010000004.1	16180	16586	-			IAQ61_001257	KAH9879439.1	122	hypothetical protein IAQ61_001257
Un	JACTNS010000004.1	17241	18851	-			IAQ61_001258	KAH9879440.1	454	hypothetical protein IAQ61_001258
Un	JACTNS010000004.1	55749	56847	+			IAQ61_001259	KAH9879441.1	346	hypothetical protein IAQ61_001259, partial
Un	JACTNS010000004.1	57951	59825	-			IAQ61_001260	KAH9879442.1	561	hypothetical protein IAQ61_001260
Un	JACTNS010000004.1	60471	62081	-			IAQ61_001261	KAH9879443.1	417	hypothetical protein IAQ61_001261
Un	JACTNS010000004.1	63652	66907	+			IAQ61_001262	KAH9879444.1	854	hypothetical protein IAQ61_001262
Un	JACTNS010000004.1	67122	69791	-			IAQ61_001263	KAH9879445.1	889	hypothetical protein IAQ61_001263
Un	JACTNS010000004.1	70096	71826	-			IAQ61_001264	KAH9879446.1	544	hypothetical protein IAQ61_001264
Un	JACTNS010000004.1	72415	73500	-			IAQ61_001265	KAH9879447.1	166	hypothetical protein IAQ61_001265
Un	JACTNS010000004.1	74697	75597	+			IAQ61_001266	KAH9879448.1	265	hypothetical protein IAQ61_001266
Un	JACTNS010000004.1	77200	78032	-			IAQ61_001267	KAH9879449.1	165	hypothetical protein IAQ61_001267
Un	JACTNS010000004.1	78611	81583	-			IAQ61_001268	KAH9879450.1	941	hypothetical protein IAQ61_001268
Un	JACTNS010000004.1	83631	85206	+			IAQ61_001269	KAH9879451.1	455	hypothetical protein IAQ61_001269
Un	JACTNS010000004.1	86666	94634	+			IAQ61_001270	KAH9879452.1	2577	hypothetical protein IAQ61_001270
Un	JACTNS010000004.1	95262	96380	-			IAQ61_001271	KAH9879453.1	372	hypothetical protein IAQ61_001271
Un	JACTNS010000004.1	97290	99871	-			IAQ61_001272	KAH9879454.1	822	hypothetical protein IAQ61_001272, partial
Un	JACTNS010000004.1	100097	102455	+			IAQ61_001273	KAH9879455.1	756	hypothetical protein IAQ61_001273
Un	JACTNS010000004.1	103530	105357	-			IAQ61_001274	KAH9879456.1	570	hypothetical protein IAQ61_001274
Un	JACTNS010000004.1	105671	106295	-			IAQ61_001275	KAH9879457.1	190	hypothetical protein IAQ61_001275
Un	JACTNS010000004.1	108480	111240	+			IAQ61_001276	KAH9879458.1	852	hypothetical protein IAQ61_001276
Un	JACTNS010000004.1	112232	113811	+			IAQ61_001277	KAH9879459.1	476	hypothetical protein IAQ61_001277
Un	JACTNS010000004.1	113997	115224	-			IAQ61_001278	KAH9879460.1	370	hypothetical protein IAQ61_001278
Un	JACTNS010000004.1	115753	116916	+			IAQ61_001279	KAH9879461.1	324	hypothetical protein IAQ61_001279
Un	JACTNS010000004.1	117371	118680	+			IAQ61_001280	KAH9879462.1	419	hypothetical protein IAQ61_001280
Un	JACTNS010000004.1	120198	122068	-			IAQ61_001281	KAH9879463.1	576	hypothetical protein IAQ61_001281
Un	JACTNS010000004.1	124892	128170	-			IAQ61_001282	KAH9879464.1	624	hypothetical protein IAQ61_001282
Un	JACTNS010000004.1	129243	131301	+		GEM1	IAQ61_001283	KAH9879465.1	625	ERMES complex Ca(2+)-binding regulatory GTPase gem1
Un	JACTNS010000004.1	132508	135896	+			IAQ61_001284	KAH9879466.1	1021	hypothetical protein IAQ61_001284
Un	JACTNS010000004.1	137121	138033	+			IAQ61_001285	KAH9879467.1	267	hypothetical protein IAQ61_001285
Un	JACTNS010000004.1	138158	138553	+			IAQ61_001286	KAH9879468.1	131	hypothetical protein IAQ61_001286
Un	JACTNS010000004.1	138616	140091	+			IAQ61_001287	KAH9879469.1	491	hypothetical protein IAQ61_001287
Un	JACTNS010000004.1	141333	142377	+			IAQ61_001288	KAH9879470.1	312	hypothetical protein IAQ61_001288
Un	JACTNS010000004.1	145530	147515	+			IAQ61_001289	KAH9879471.1	570	hypothetical protein IAQ61_001289
Un	JACTNS010000004.1	182394	182896	+			IAQ61_001290	KAH9879472.1	138	hypothetical protein IAQ61_001290
Un	JACTNS010000004.1	183143	183352	+			IAQ61_001291	KAH9879473.1	69	hypothetical protein IAQ61_001291
Un	JACTNS010000004.1	184019	184916	-			IAQ61_001292	KAH9879474.1	275	hypothetical protein IAQ61_001292
Un	JACTNS010000004.1	185704	186246	-			IAQ61_001293	KAH9879475.1	180	hypothetical protein IAQ61_001293
Un	JACTNS010000004.1	189663	189905	+			IAQ61_001294	KAH9879476.1	80	hypothetical protein IAQ61_001294
Un	JACTNS010000004.1	190762	191787	+			IAQ61_001295	KAH9879477.1	305	hypothetical protein IAQ61_001295
Un	JACTNS010000004.1	191930	193066	-			IAQ61_001296	KAH9879478.1	323	hypothetical protein IAQ61_001296
Un	JACTNS010000004.1	195128	196304	+			IAQ61_001297	KAH9879479.1	335	hypothetical protein IAQ61_001297
Un	JACTNS010000004.1	196721	196987	-			IAQ61_001298	KAH9879480.1	88	hypothetical protein IAQ61_001298
Un	JACTNS010000004.1	197873	199146	+			IAQ61_001299	KAH9879481.1	404	hypothetical protein IAQ61_001299
Un	JACTNS010000004.1	199342	202041	-			IAQ61_001300	KAH9879482.1	841	hypothetical protein IAQ61_001300
Un	JACTNS010000004.1	203680	204647	-			IAQ61_001301	KAH9879483.1	234	hypothetical protein IAQ61_001301
Un	JACTNS010000004.1	205887	207695	+			IAQ61_001302	KAH9879484.1	602	hypothetical protein IAQ61_001302
Un	JACTNS010000004.1	208004	210032	-			IAQ61_001303	KAH9879485.1	515	hypothetical protein IAQ61_001303
Un	JACTNS010000004.1	211467	212498	-			IAQ61_001304	KAH9879486.1	237	hypothetical protein IAQ61_001304
Un	JACTNS010000004.1	212951	215726	+		CCT5	IAQ61_001305	KAH9879487.1	548	T-complex protein 1 subunit epsilon
Un	JACTNS010000004.1	218457	219360	+			IAQ61_001306	KAH9879488.1	241	hypothetical protein IAQ61_001306, partial
Un	JACTNS010000004.1	221429	221614	+			IAQ61_001307	KAH9879489.1	61	hypothetical protein IAQ61_001307
Un	JACTNS010000004.1	225334	227171	-			IAQ61_001308	KAH9879490.1	572	hypothetical protein IAQ61_001308
Un	JACTNS010000004.1	232778	233413	+			IAQ61_001309	KAH9879491.1	211	hypothetical protein IAQ61_001309
Un	JACTNS010000004.1	237502	237771	-			IAQ61_001310	KAH9879492.1	89	hypothetical protein IAQ61_001310
Un	JACTNS010000004.1	238858	240423	-			IAQ61_001311	KAH9879493.1	521	hypothetical protein IAQ61_001311
Un	JACTNS010000004.1	240463	240762	-			IAQ61_001312	KAH9879494.1	99	hypothetical protein IAQ61_001312
Un	JACTNS010000004.1	242543	244597	-			IAQ61_001313	KAH9879495.1	509	hypothetical protein IAQ61_001313
Un	JACTNS010000004.1	245272	245595	+			IAQ61_001314	KAH9879496.1	107	hypothetical protein IAQ61_001314
Un	JACTNS010000004.1	245882	246371	+			IAQ61_001315	KAH9879497.1	92	hypothetical protein IAQ61_001315
Un	JACTNS010000004.1	247665	248320	-			IAQ61_001316	KAH9879498.1	194	hypothetical protein IAQ61_001316
Un	JACTNS010000004.1	249006	251003	+			IAQ61_001317	KAH9879499.1	665	hypothetical protein IAQ61_001317
Un	JACTNS010000004.1	251196	251586	-			IAQ61_001318	KAH9879500.1	79	hypothetical protein IAQ61_001318
Un	JACTNS010000004.1	251676	257235	+			IAQ61_001319	KAH9879501.1	1489	hypothetical protein IAQ61_001319
Un	JACTNS010000004.1	257597	259114	+			IAQ61_001320	KAH9879502.1	505	hypothetical protein IAQ61_001320
Un	JACTNS010000004.1	260091	261881	+			IAQ61_001321	KAH9879503.1	596	hypothetical protein IAQ61_001321
Un	JACTNS010000004.1	263133	263533	-			IAQ61_001322	KAH9879504.1	84	hypothetical protein IAQ61_001322
Un	JACTNS010000004.1	264650	265018	+			IAQ61_001323	KAH9879505.1	122	hypothetical protein IAQ61_001323
Un	JACTNS010000004.1	273681	274858	+			IAQ61_001324	KAH9879506.1	366	hypothetical protein IAQ61_001324
Un	JACTNS010000004.1	276446	276733	-			IAQ61_001325	KAH9879507.1	95	hypothetical protein IAQ61_001325
Un	JACTNS010000004.1	277246	279114	-			IAQ61_001326	KAH9879508.1	622	hypothetical protein IAQ61_001326
Un	JACTNS010000004.1	280998	281641	+			IAQ61_001327	KAH9879509.1	105	hypothetical protein IAQ61_001327, partial
Un	JACTNS010000004.1	281666	282677	-			IAQ61_001328	KAH9879510.1	164	hypothetical protein IAQ61_001328, partial
Un	JACTNS010000004.1	283613	284493	+			IAQ61_001329	KAH9879511.1	275	hypothetical protein IAQ61_001329
Un	JACTNS010000004.1	284995	285258	+			IAQ61_001330	KAH9879512.1	87	hypothetical protein IAQ61_001330
Un	JACTNS010000004.1	285469	290066	+			IAQ61_001331	KAH9879513.1	1509	hypothetical protein IAQ61_001331
Un	JACTNS010000004.1	291107	292796	+			IAQ61_001332	KAH9879514.1	474	hypothetical protein IAQ61_001332
Un	JACTNS010000004.1	354128	356287	-			IAQ61_001333	KAH9879515.1	667	hypothetical protein IAQ61_001333
Un	JACTNS010000004.1	356543	358090	+		RRD1	IAQ61_001334	KAH9879516.1	515	Serine/threonine-protein phosphatase 2A activator 1
Un	JACTNS010000004.1	358276	359463	-			IAQ61_001335	KAH9879517.1	395	hypothetical protein IAQ61_001335
Un	JACTNS010000004.1	359516	360471	-			IAQ61_001336	KAH9879518.1	283	hypothetical protein IAQ61_001336
Un	JACTNS010000004.1	360526	360942	-			IAQ61_001337	KAH9879519.1	138	hypothetical protein IAQ61_001337
Un	JACTNS010000004.1	361835	362984	-			IAQ61_001338	KAH9879520.1	252	hypothetical protein IAQ61_001338
Un	JACTNS010000004.1	365826	367692	-			IAQ61_001339	KAH9879521.1	601	hypothetical protein IAQ61_001339
Un	JACTNS010000004.1	368496	369286	+			IAQ61_001340	KAH9879522.1	242	hypothetical protein IAQ61_001340
Un	JACTNS010000004.1	369441	370498	-			IAQ61_001341	KAH9879523.1	335	hypothetical protein IAQ61_001341
Un	JACTNS010000004.1	370880	372709	+			IAQ61_001342	KAH9879524.1	609	hypothetical protein IAQ61_001342
Un	JACTNS010000004.1	373247	377397	+			IAQ61_001343	KAH9879525.1	1264	hypothetical protein IAQ61_001343
Un	JACTNS010000004.1	378022	379452	-		ARG1	IAQ61_001344	KAH9879526.1	415	argininosuccinate synthetase
Un	JACTNS010000004.1	380066	383443	-			IAQ61_001345	KAH9879527.1	1089	hypothetical protein IAQ61_001345
Un	JACTNS010000004.1	384336	386832	+		VPS27	IAQ61_001346	KAH9879528.1	746	Vacuolar protein-sorting-associated protein 27
Un	JACTNS010000004.1	387611	389679	-			IAQ61_001347	KAH9879529.1	632	hypothetical protein IAQ61_001347, partial
Un	JACTNS010000004.1	390794	392430	+			IAQ61_001348	KAH9879530.1	476	hypothetical protein IAQ61_001348
Un	JACTNS010000004.1	392497	393516	-			IAQ61_001349	KAH9879531.1	339	hypothetical protein IAQ61_001349
Un	JACTNS010000004.1	394553	397477	-			IAQ61_001350	KAH9879532.1	897	hypothetical protein IAQ61_001350, partial
Un	JACTNS010000004.1	398218	398865	+		TIM17_1	IAQ61_001351	KAH9879533.1	163	translocase of the inner membrane
Un	JACTNS010000004.1	399574	400373	-			IAQ61_001352	KAH9879534.1	209	hypothetical protein IAQ61_001352
Un	JACTNS010000004.1	400428	401927	-			IAQ61_001353	KAH9879535.1	465	hypothetical protein IAQ61_001353
Un	JACTNS010000004.1	402177	402377	+			IAQ61_001354	KAH9879536.1	66	hypothetical protein IAQ61_001354
Un	JACTNS010000004.1	402868	403402	-			IAQ61_001355	KAH9879537.1	160	hypothetical protein IAQ61_001355
Un	JACTNS010000004.1	405484	406541	+			IAQ61_001356	KAH9879538.1	301	hypothetical protein IAQ61_001356
Un	JACTNS010000004.1	407135	408265	-			IAQ61_001357	KAH9879539.1	376	hypothetical protein IAQ61_001357
Un	JACTNS010000004.1	408884	410146	-			IAQ61_001358	KAH9879540.1	308	hypothetical protein IAQ61_001358, partial
Un	JACTNS010000004.1	410502	410825	-			IAQ61_001359	KAH9879541.1	107	hypothetical protein IAQ61_001359
Un	JACTNS010000004.1	411515	411913	-			IAQ61_001360	KAH9879542.1	132	hypothetical protein IAQ61_001360
Un	JACTNS010000004.1	413271	414328	-			IAQ61_001361	KAH9879543.1	247	hypothetical protein IAQ61_001361
Un	JACTNS010000004.1	415193	416382	+			IAQ61_001362	KAH9879544.1	321	hypothetical protein IAQ61_001362
Un	JACTNS010000004.1	416995	418905	+			IAQ61_001363	KAH9879545.1	586	hypothetical protein IAQ61_001363
Un	JACTNS010000004.1	419274	420028	+			IAQ61_001364	KAH9879546.1	227	hypothetical protein IAQ61_001364
Un	JACTNS010000004.1	421356	421580	+			IAQ61_001365	KAH9879547.1	74	hypothetical protein IAQ61_001365
Un	JACTNS010000004.1	422701	425937	+			IAQ61_001366	KAH9879548.1	1078	hypothetical protein IAQ61_001366
Un	JACTNS010000004.1	427113	428723	-			IAQ61_001367	KAH9879549.1	536	hypothetical protein IAQ61_001367
Un	JACTNS010000004.1	430495	433436	-			IAQ61_001368	KAH9879550.1	865	hypothetical protein IAQ61_001368, partial
Un	JACTNS010000004.1	434196	437674	+			IAQ61_001369	KAH9879551.1	1082	hypothetical protein IAQ61_001369
Un	JACTNS010000004.1	438474	442418	+			IAQ61_001370	KAH9879552.1	1276	hypothetical protein IAQ61_001370
Un	JACTNS010000004.1	444431	445213	-			IAQ61_001371	KAH9879553.1	260	hypothetical protein IAQ61_001371
Un	JACTNS010000004.1	446849	448993	+			IAQ61_001372	KAH9879554.1	526	hypothetical protein IAQ61_001372, partial
Un	JACTNS010000004.1	449828	450310	+			IAQ61_001373	KAH9879555.1	160	hypothetical protein IAQ61_001373
Un	JACTNS010000004.1	450759	450992	-			IAQ61_001374	KAH9879556.1	77	hypothetical protein IAQ61_001374
Un	JACTNS010000004.1	451588	453433	+			IAQ61_001375	KAH9879557.1	541	hypothetical protein IAQ61_001375
Un	JACTNS010000004.1	453675	455379	-			IAQ61_001376	KAH9879558.1	534	hypothetical protein IAQ61_001376
Un	JACTNS010000004.1	456695	459518	-			IAQ61_001377	KAH9879559.1	922	hypothetical protein IAQ61_001377
Un	JACTNS010000004.1	460808	461359	-			IAQ61_001378	KAH9879560.1	82	hypothetical protein IAQ61_001378
Un	JACTNS010000004.1	461728	463186	+			IAQ61_001379	KAH9879561.1	428	hypothetical protein IAQ61_001379
Un	JACTNS010000004.1	463582	464595	+			IAQ61_001380	KAH9879562.1	337	hypothetical protein IAQ61_001380
Un	JACTNS010000004.1	465291	466106	+			IAQ61_001381	KAH9879563.1	271	hypothetical protein IAQ61_001381
Un	JACTNS010000004.1	466322	467278	+			IAQ61_001382	KAH9879564.1	318	hypothetical protein IAQ61_001382
Un	JACTNS010000004.1	467319	468350	-			IAQ61_001383	KAH9879565.1	343	hypothetical protein IAQ61_001383
Un	JACTNS010000004.1	468979	471357	-			IAQ61_001384	KAH9879566.1	625	hypothetical protein IAQ61_001384
Un	JACTNS010000004.1	472013	473545	-			IAQ61_001385	KAH9879567.1	510	hypothetical protein IAQ61_001385
Un	JACTNS010000004.1	474082	474939	-			IAQ61_001386	KAH9879568.1	285	hypothetical protein IAQ61_001386
Un	JACTNS010000004.1	475631	476719	+			IAQ61_001387	KAH9879569.1	342	hypothetical protein IAQ61_001387
Un	JACTNS010000004.1	477620	478666	+			IAQ61_001388	KAH9879570.1	329	hypothetical protein IAQ61_001388
Un	JACTNS010000004.1	479788	481138	+			IAQ61_001389	KAH9879571.1	430	hypothetical protein IAQ61_001389
Un	JACTNS010000004.1	481221	482028	-			IAQ61_001390	KAH9879572.1	247	hypothetical protein IAQ61_001390
Un	JACTNS010000004.1	483228	483503	-			IAQ61_001391	KAH9879573.1	91	hypothetical protein IAQ61_001391
Un	JACTNS010000004.1	484169	486263	+			IAQ61_001392	KAH9879574.1	678	hypothetical protein IAQ61_001392
Un	JACTNS010000004.1	488887	490046	+			IAQ61_001393	KAH9879575.1	363	hypothetical protein IAQ61_001393
Un	JACTNS010000004.1	490883	491248	-			IAQ61_001394	KAH9879576.1	121	hypothetical protein IAQ61_001394
Un	JACTNS010000004.1	492894	495080	-			IAQ61_001395	KAH9879577.1	674	hypothetical protein IAQ61_001395
Un	JACTNS010000004.1	496367	498174	-			IAQ61_001396	KAH9879578.1	584	hypothetical protein IAQ61_001396
Un	JACTNS010000004.1	498442	499355	+			IAQ61_001397	KAH9879579.1	253	hypothetical protein IAQ61_001397
Un	JACTNS010000004.1	499776	501079	+			IAQ61_001398	KAH9879580.1	416	hypothetical protein IAQ61_001398
Un	JACTNS010000004.1	502222	505107	-			IAQ61_001399	KAH9879581.1	943	hypothetical protein IAQ61_001399
Un	JACTNS010000004.1	506198	506926	+			IAQ61_001400	KAH9879582.1	242	hypothetical protein IAQ61_001400
Un	JACTNS010000004.1	507457	509184	+			IAQ61_001401	KAH9879583.1	535	hypothetical protein IAQ61_001401
Un	JACTNS010000004.1	511504	511848	-			IAQ61_001402	KAH9879584.1	114	hypothetical protein IAQ61_001402
Un	JACTNS010000004.1	512660	513436	-			IAQ61_001403	KAH9879585.1	234	hypothetical protein IAQ61_001403
Un	JACTNS010000004.1	513638	514075	-			IAQ61_001404	KAH9879586.1	145	hypothetical protein IAQ61_001404
Un	JACTNS010000004.1	514138	514605	+			IAQ61_001405	KAH9879587.1	155	hypothetical protein IAQ61_001405
Un	JACTNS010000004.1	515891	516326	-			IAQ61_001406	KAH9879588.1	97	hypothetical protein IAQ61_001406
Un	JACTNS010000004.1	517633	519643	+			IAQ61_001407	KAH9879589.1	605	hypothetical protein IAQ61_001407
Un	JACTNS010000004.1	520145	521216	-			IAQ61_001408	KAH9879590.1	340	hypothetical protein IAQ61_001408
Un	JACTNS010000004.1	555323	556121	+			IAQ61_001409	KAH9879591.1	242	hypothetical protein IAQ61_001409
Un	JACTNS010000004.1	557125	559448	-			IAQ61_001410	KAH9879592.1	702	hypothetical protein IAQ61_001410
Un	JACTNS010000004.1	562051	564985	-			IAQ61_001411	KAH9879593.1	576	hypothetical protein IAQ61_001411
Un	JACTNS010000004.1	566771	568177	-			IAQ61_001412	KAH9879594.1	408	hypothetical protein IAQ61_001412
Un	JACTNS010000004.1	569134	571556	+			IAQ61_001413	KAH9879595.1	751	hypothetical protein IAQ61_001413
Un	JACTNS010000004.1	572604	575036	-			IAQ61_001414	KAH9879596.1	689	hypothetical protein IAQ61_001414
Un	JACTNS010000004.1	588133	589451	+			IAQ61_001415	KAH9879597.1	384	hypothetical protein IAQ61_001415
Un	JACTNS010000004.1	592365	592658	+			IAQ61_001416	KAH9879598.1	97	hypothetical protein IAQ61_001416
Un	JACTNS010000004.1	593926	596065	-			IAQ61_001417	KAH9879599.1	660	hypothetical protein IAQ61_001417
Un	JACTNS010000004.1	596423	598278	+			IAQ61_001418	KAH9879600.1	585	hypothetical protein IAQ61_001418
Un	JACTNS010000004.1	599247	601204	+			IAQ61_001419	KAH9879601.1	556	hypothetical protein IAQ61_001419
Un	JACTNS010000004.1	603066	603374	+			IAQ61_001421	KAH9879602.1	102	hypothetical protein IAQ61_001421
Un	JACTNS010000004.1	604057	605484	-			IAQ61_001422	KAH9879603.1	475	hypothetical protein IAQ61_001422
Un	JACTNS010000004.1	607096	608093	+			IAQ61_001423	KAH9879604.1	299	hypothetical protein IAQ61_001423
Un	JACTNS010000004.1	609722	611228	+			IAQ61_001424	KAH9879605.1	399	hypothetical protein IAQ61_001424
Un	JACTNS010000004.1	612469	615277	+			IAQ61_001425	KAH9879606.1	801	hypothetical protein IAQ61_001425
Un	JACTNS010000004.1	616077	616507	+			IAQ61_001426	KAH9879607.1	111	hypothetical protein IAQ61_001426, partial
Un	JACTNS010000004.1	617052	617561	+			IAQ61_001427	KAH9879608.1	97	hypothetical protein IAQ61_001427
Un	JACTNS010000004.1	618941	619458	+			IAQ61_001428	KAH9879609.1	150	hypothetical protein IAQ61_001428
Un	JACTNS010000004.1	626810	628068	-			IAQ61_001429	KAH9879610.1	98	hypothetical protein IAQ61_001429
Un	JACTNS010000004.1	629155	632492	+			IAQ61_001430	KAH9879611.1	1060	hypothetical protein IAQ61_001430
Un	JACTNS010000004.1	632843	633710	-			IAQ61_001431	KAH9879612.1	263	hypothetical protein IAQ61_001431
Un	JACTNS010000004.1	634118	635986	+			IAQ61_001432	KAH9879613.1	622	hypothetical protein IAQ61_001432
Un	JACTNS010000004.1	637255	637551	-			IAQ61_001433	KAH9879614.1	98	hypothetical protein IAQ61_001433
Un	JACTNS010000004.1	638944	639582	+			IAQ61_001434	KAH9879615.1	212	hypothetical protein IAQ61_001434
Un	JACTNS010000004.1	641262	643165	-			IAQ61_001435	KAH9879616.1	592	hypothetical protein IAQ61_001435
Un	JACTNS010000004.1	643484	644862	-			IAQ61_001436	KAH9879617.1	251	hypothetical protein IAQ61_001436
Un	JACTNS010000004.1	647404	648063	+			IAQ61_001437	KAH9879618.1	219	hypothetical protein IAQ61_001437
Un	JACTNS010000004.1	648579	648806	+			IAQ61_001438	KAH9879619.1	75	hypothetical protein IAQ61_001438
Un	JACTNS010000004.1	650059	651648	-			IAQ61_001439	KAH9879620.1	471	hypothetical protein IAQ61_001439
Un	JACTNS010000004.1	652830	653954	+			IAQ61_001440	KAH9879621.1	356	hypothetical protein IAQ61_001440
Un	JACTNS010000004.1	654302	656552	-			IAQ61_001441	KAH9879622.1	595	hypothetical protein IAQ61_001441, partial
Un	JACTNS010000004.1	657789	658784	+			IAQ61_001442	KAH9879623.1	331	hypothetical protein IAQ61_001442
Un	JACTNS010000004.1	659672	661513	+			IAQ61_001443	KAH9879624.1	551	hypothetical protein IAQ61_001443
Un	JACTNS010000004.1	662287	663710	-			IAQ61_001444	KAH9879625.1	444	hypothetical protein IAQ61_001444, partial
Un	JACTNS010000004.1	664359	667598	-			IAQ61_001445	KAH9879626.1	720	hypothetical protein IAQ61_001445, partial
Un	JACTNS010000004.1	668251	670712	-			IAQ61_001446	KAH9879627.1	532	hypothetical protein IAQ61_001446, partial
Un	JACTNS010000004.1	671450	672850	-			IAQ61_001447	KAH9879628.1	411	hypothetical protein IAQ61_001447
Un	JACTNS010000004.1	673381	675129	-			IAQ61_001448	KAH9879629.1	582	hypothetical protein IAQ61_001448
Un	JACTNS010000004.1	677924	679111	+			IAQ61_001449	KAH9879630.1	395	hypothetical protein IAQ61_001449
Un	JACTNS010000004.1	679618	680561	+			IAQ61_001450	KAH9879631.1	294	hypothetical protein IAQ61_001450
Un	JACTNS010000004.1	680616	681004	-			IAQ61_001451	KAH9879632.1	109	hypothetical protein IAQ61_001451
Un	JACTNS010000004.1	681821	684409	-			IAQ61_001452	KAH9879633.1	814	hypothetical protein IAQ61_001452
Un	JACTNS010000004.1	684555	684851	+			IAQ61_001453	KAH9879634.1	98	hypothetical protein IAQ61_001453
Un	JACTNS010000004.1	685405	685995	-			IAQ61_001454	KAH9879635.1	196	hypothetical protein IAQ61_001454
Un	JACTNS010000004.1	686811	688458	-			IAQ61_001455	KAH9879636.1	529	hypothetical protein IAQ61_001455
Un	JACTNS010000004.1	689465	690259	+			IAQ61_001456	KAH9879637.1	226	hypothetical protein IAQ61_001456
Un	JACTNS010000004.1	690977	692278	+			IAQ61_001457	KAH9879638.1	433	hypothetical protein IAQ61_001457
Un	JACTNS010000004.1	692941	694082	-		MIC33	IAQ61_001458	KAH9879639.1	349	putative mitochondrial 2-oxoglutarate/malate carrier protein
Un	JACTNS010000004.1	694984	695313	-			IAQ61_001459	KAH9879640.1	109	hypothetical protein IAQ61_001459
Un	JACTNS010000004.1	696563	696814	+			IAQ61_001460	KAH9879641.1	83	hypothetical protein IAQ61_001460
Un	JACTNS010000004.1	697334	698932	-			IAQ61_001461	KAH9879642.1	466	hypothetical protein IAQ61_001461
Un	JACTNS010000004.1	699565	701167	+			IAQ61_001462	KAH9879643.1	481	hypothetical protein IAQ61_001462
Un	JACTNS010000004.1	701649	703621	+			IAQ61_001463	KAH9879644.1	642	hypothetical protein IAQ61_001463
Un	JACTNS010000004.1	704019	705019	+		FAC1	IAQ61_001464	KAH9879645.1	270	F-actin-capping protein subunit alpha
Un	JACTNS010000004.1	705618	706106	+			IAQ61_001465	KAH9879646.1	92	hypothetical protein IAQ61_001465
Un	JACTNS010000004.1	708806	710174	-			IAQ61_001466	KAH9879647.1	287	hypothetical protein IAQ61_001466, partial
Un	JACTNS010000004.1	712965	713839	+			IAQ61_001467	KAH9879648.1	137	hypothetical protein IAQ61_001467
Un	JACTNS010000004.1	716682	717869	-			IAQ61_001468	KAH9879649.1	157	hypothetical protein IAQ61_001468
Un	JACTNS010000004.1	717953	723288	-			IAQ61_001469	KAH9879650.1	1679	hypothetical protein IAQ61_001469
Un	JACTNS010000004.1	724954	725671	+			IAQ61_001470	KAH9879651.1	124	hypothetical protein IAQ61_001470
Un	JACTNS010000004.1	726168	726773	+			IAQ61_001471	KAH9879652.1	201	hypothetical protein IAQ61_001471
Un	JACTNS010000004.1	727957	729450	-			IAQ61_001472	KAH9879653.1	419	hypothetical protein IAQ61_001472
Un	JACTNS010000004.1	729965	731443	-			IAQ61_001473	KAH9879654.1	339	hypothetical protein IAQ61_001473
Un	JACTNS010000004.1	731808	733663	+			IAQ61_001474	KAH9879655.1	596	hypothetical protein IAQ61_001474
Un	JACTNS010000004.1	733914	736394	-		MAK5	IAQ61_001475	KAH9879656.1	826	ATP-dependent RNA helicase
Un	JACTNS010000004.1	736787	737953	+			IAQ61_001476	KAH9879657.1	388	hypothetical protein IAQ61_001476
Un	JACTNS010000004.1	739038	743708	-			IAQ61_001477	KAH9879658.1	1540	hypothetical protein IAQ61_001477
Un	JACTNS010000004.1	745892	747637	+			IAQ61_001478	KAH9879659.1	581	hypothetical protein IAQ61_001478
Un	JACTNS010000004.1	748395	749250	+			IAQ61_001479	KAH9879660.1	128	hypothetical protein IAQ61_001479
Un	JACTNS010000004.1	749859	752251	-			IAQ61_001480	KAH9879661.1	761	hypothetical protein IAQ61_001480
Un	JACTNS010000004.1	753260	758420	+			IAQ61_001481	KAH9879662.1	1684	hypothetical protein IAQ61_001481, partial
Un	JACTNS010000004.1	758926	759875	-			IAQ61_001482	KAH9879663.1	143	hypothetical protein IAQ61_001482
Un	JACTNS010000004.1	760236	761009	-			IAQ61_001483	KAH9879664.1	257	hypothetical protein IAQ61_001483
Un	JACTNS010000004.1	761919	764467	+			IAQ61_001484	KAH9879665.1	816	hypothetical protein IAQ61_001484
Un	JACTNS010000004.1	766441	770459	-			IAQ61_001485	KAH9879666.1	1304	hypothetical protein IAQ61_001485
Un	JACTNS010000004.1	771399	771983	-			IAQ61_001486	KAH9879667.1	194	hypothetical protein IAQ61_001486
Un	JACTNS010000004.1	772665	774823	-		HSE1	IAQ61_001487	KAH9879668.1	635	ESCRT-0 subunit protein hse1
Un	JACTNS010000004.1	775997	778376	-			IAQ61_001488	KAH9879669.1	672	hypothetical protein IAQ61_001488
Un	JACTNS010000004.1	779197	779550	+			IAQ61_001489	KAH9879670.1	117	hypothetical protein IAQ61_001489
Un	JACTNS010000004.1	780532	781342	+			IAQ61_001490	KAH9879671.1	246	hypothetical protein IAQ61_001490, partial
Un	JACTNS010000004.1	783085	784643	-			IAQ61_001491	KAH9879672.1	501	hypothetical protein IAQ61_001491, partial
Un	JACTNS010000004.1	785718	787199	-			IAQ61_001492	KAH9879673.1	277	hypothetical protein IAQ61_001492, partial
Un	JACTNS010000004.1	789739	789948	-			IAQ61_001493	KAH9879674.1	69	hypothetical protein IAQ61_001493
Un	JACTNS010000004.1	790424	791152	+			IAQ61_001494	KAH9879675.1	242	hypothetical protein IAQ61_001494
Un	JACTNS010000004.1	791704	792428	-			IAQ61_001495	KAH9879676.1	205	hypothetical protein IAQ61_001495
Un	JACTNS010000004.1	795196	795810	-			IAQ61_001496	KAH9879677.1	204	hypothetical protein IAQ61_001496
Un	JACTNS010000004.1	796385	798270	-			IAQ61_001497	KAH9879678.1	540	hypothetical protein IAQ61_001497
Un	JACTNS010000004.1	803936	804614	+			IAQ61_001498	KAH9879679.1	182	hypothetical protein IAQ61_001498
Un	JACTNS010000004.1	804894	805229	-			IAQ61_001499	KAH9879680.1	111	hypothetical protein IAQ61_001499
Un	JACTNS010000004.1	805440	806747	+			IAQ61_001500	KAH9879681.1	261	hypothetical protein IAQ61_001500
Un	JACTNS010000004.1	808793	809074	+			IAQ61_001501	KAH9879682.1	77	hypothetical protein IAQ61_001501
Un	JACTNS010000004.1	812346	813422	-			IAQ61_001502	KAH9879683.1	358	hypothetical protein IAQ61_001502
Un	JACTNS010000004.1	814912	815627	-			IAQ61_001503	KAH9879684.1	151	hypothetical protein IAQ61_001503
Un	JACTNS010000004.1	817028	822380	+			IAQ61_001504	KAH9879685.1	1746	hypothetical protein IAQ61_001504
Un	JACTNS010000004.1	822919	825540	-			IAQ61_001505	KAH9879686.1	873	hypothetical protein IAQ61_001505
Un	JACTNS010000004.1	826962	828601	-			IAQ61_001506	KAH9879687.1	527	hypothetical protein IAQ61_001506, partial
Un	JACTNS010000004.1	829224	832222	+			IAQ61_001507	KAH9879688.1	978	hypothetical protein IAQ61_001507
Un	JACTNS010000004.1	854587	855186	+			IAQ61_001508	KAH9879689.1	199	hypothetical protein IAQ61_001508
Un	JACTNS010000004.1	856036	856653	+			IAQ61_001509	KAH9879690.1	205	hypothetical protein IAQ61_001509
Un	JACTNS010000004.1	858094	859667	-			IAQ61_001510	KAH9879691.1	450	hypothetical protein IAQ61_001510
Un	JACTNS010000004.1	860979	861501	+			IAQ61_001511	KAH9879692.1	109	hypothetical protein IAQ61_001511
Un	JACTNS010000004.1	861737	862387	+			IAQ61_001512	KAH9879693.1	139	hypothetical protein IAQ61_001512
Un	JACTNS010000004.1	862769	863050	-			IAQ61_001513	KAH9879694.1	93	hypothetical protein IAQ61_001513
Un	JACTNS010000004.1	863232	864154	-			IAQ61_001514	KAH9879695.1	235	hypothetical protein IAQ61_001514
Un	JACTNS010000004.1	865165	866556	-			IAQ61_001515	KAH9879696.1	463	hypothetical protein IAQ61_001515
Un	JACTNS010000004.1	866935	868512	+			IAQ61_001516	KAH9879697.1	486	hypothetical protein IAQ61_001516
Un	JACTNS010000004.1	869153	871273	+			IAQ61_001517	KAH9879698.1	544	hypothetical protein IAQ61_001517
Un	JACTNS010000004.1	872895	874906	+			IAQ61_001518	KAH9879699.1	616	hypothetical protein IAQ61_001518
Un	JACTNS010000004.1	875691	877292	+			IAQ61_001519	KAH9879700.1	517	hypothetical protein IAQ61_001519
Un	JACTNS010000004.1	878379	879794	-			IAQ61_001520	KAH9879701.1	471	hypothetical protein IAQ61_001520
Un	JACTNS010000004.1	880550	880762	+			IAQ61_001521	KAH9879702.1	70	hypothetical protein IAQ61_001521
Un	JACTNS010000004.1	881014	884298	-			IAQ61_001522	KAH9879703.1	713	hypothetical protein IAQ61_001522, partial
Un	JACTNS010000004.1	885350	886621	+			IAQ61_001523	KAH9879704.1	423	hypothetical protein IAQ61_001523
Un	JACTNS010000004.1	886784	887053	-			IAQ61_001524	KAH9879705.1	89	hypothetical protein IAQ61_001524
Un	JACTNS010000004.1	888468	890136	+			IAQ61_001525	KAH9879706.1	536	hypothetical protein IAQ61_001525
Un	JACTNS010000004.1	891882	893240	-			IAQ61_001526	KAH9879707.1	452	hypothetical protein IAQ61_001526
Un	JACTNS010000004.1	894024	896687	-			IAQ61_001527	KAH9879708.1	887	hypothetical protein IAQ61_001527
Un	JACTNS010000004.1	898506	899457	-			IAQ61_001528	KAH9879709.1	300	hypothetical protein IAQ61_001528
Un	JACTNS010000004.1	900851	901150	+			IAQ61_001529	KAH9879710.1	99	hypothetical protein IAQ61_001529
Un	JACTNS010000004.1	901454	907496	+			IAQ61_001530	KAH9879711.1	1861	hypothetical protein IAQ61_001530
Un	JACTNS010000004.1	908556	910130	+			IAQ61_001531	KAH9879712.1	524	hypothetical protein IAQ61_001531
Un	JACTNS010000004.1	910384	911938	-			IAQ61_001532	KAH9879713.1	399	hypothetical protein IAQ61_001532, partial
Un	JACTNS010000004.1	912781	916857	+			IAQ61_001533	KAH9879714.1	1336	hypothetical protein IAQ61_001533
Un	JACTNS010000004.1	918403	920759	+			IAQ61_001534	KAH9879715.1	727	hypothetical protein IAQ61_001534
Un	JACTNS010000004.1	921375	922172	+			IAQ61_001535	KAH9879716.1	265	hypothetical protein IAQ61_001535
Un	JACTNS010000004.1	922926	925606	+			IAQ61_001536	KAH9879717.1	867	hypothetical protein IAQ61_001536, partial
Un	JACTNS010000004.1	926203	927142	+			IAQ61_001537	KAH9879718.1	130	hypothetical protein IAQ61_001537, partial
Un	JACTNS010000004.1	927967	928161	-			IAQ61_001538	KAH9879719.1	64	hypothetical protein IAQ61_001538
Un	JACTNS010000004.1	928569	930769	+			IAQ61_001539	KAH9879720.1	629	hypothetical protein IAQ61_001539
Un	JACTNS010000004.1	931712	935287	-			IAQ61_001540	KAH9879721.1	1010	hypothetical protein IAQ61_001540
Un	JACTNS010000004.1	938279	939703	+			IAQ61_001541	KAH9879722.1	449	hypothetical protein IAQ61_001541
Un	JACTNS010000004.1	940839	942902	-			IAQ61_001542	KAH9879723.1	687	hypothetical protein IAQ61_001542
Un	JACTNS010000004.1	943960	945931	+			IAQ61_001543	KAH9879724.1	408	hypothetical protein IAQ61_001543, partial
Un	JACTNS010000004.1	947739	947990	+			IAQ61_001544	KAH9879725.1	83	hypothetical protein IAQ61_001544
Un	JACTNS010000004.1	949893	951486	-			IAQ61_001545	KAH9879726.1	424	hypothetical protein IAQ61_001545
Un	JACTNS010000004.1	955604	958863	+			IAQ61_001546	KAH9879727.1	878	hypothetical protein IAQ61_001546
Un	JACTNS010000004.1	959545	961152	+			IAQ61_001547	KAH9879728.1	500	hypothetical protein IAQ61_001547
Un	JACTNS010000004.1	961544	963495	-			IAQ61_001548	KAH9879729.1	627	hypothetical protein IAQ61_001548
Un	JACTNS010000004.1	965197	966447	+			IAQ61_001549	KAH9879730.1	355	hypothetical protein IAQ61_001549
Un	JACTNS010000004.1	966736	967299	-			IAQ61_001550	KAH9879731.1	187	hypothetical protein IAQ61_001550
Un	JACTNS010000004.1	968754	970694	+			IAQ61_001551	KAH9879732.1	588	hypothetical protein IAQ61_001551
Un	JACTNS010000004.1	970940	971119	-			IAQ61_001552	KAH9879733.1	59	hypothetical protein IAQ61_001552
Un	JACTNS010000004.1	971317	972168	+			IAQ61_001553	KAH9879734.1	231	hypothetical protein IAQ61_001553
Un	JACTNS010000004.1	973289	975495	-			IAQ61_001554	KAH9879735.1	495	hypothetical protein IAQ61_001554
Un	JACTNS010000004.1	975541	976280	+			IAQ61_001555	KAH9879736.1	148	hypothetical protein IAQ61_001555
Un	JACTNS010000005.1	15621	16987	-			IAQ61_001581	KAH9878310.1	397	hypothetical protein IAQ61_001581, partial
Un	JACTNS010000005.1	17147	17482	+			IAQ61_001582	KAH9878311.1	111	hypothetical protein IAQ61_001582
Un	JACTNS010000005.1	18256	20004	+			IAQ61_001583	KAH9878312.1	511	hypothetical protein IAQ61_001583
Un	JACTNS010000005.1	20135	20524	+			IAQ61_001584	KAH9878313.1	129	hypothetical protein IAQ61_001584
Un	JACTNS010000005.1	21746	23446	+			IAQ61_001585	KAH9878314.1	525	hypothetical protein IAQ61_001585
Un	JACTNS010000005.1	24999	28040	-			IAQ61_001586	KAH9878315.1	995	hypothetical protein IAQ61_001586
Un	JACTNS010000005.1	30329	30943	-			IAQ61_001587	KAH9878316.1	113	hypothetical protein IAQ61_001587
Un	JACTNS010000005.1	31358	34497	-			IAQ61_001588	KAH9878317.1	1028	hypothetical protein IAQ61_001588
Un	JACTNS010000005.1	35250	37786	+			IAQ61_001589	KAH9878318.1	790	hypothetical protein IAQ61_001589
Un	JACTNS010000005.1	42974	43447	-			IAQ61_001590	KAH9878319.1	87	hypothetical protein IAQ61_001590
Un	JACTNS010000005.1	44736	45182	-			IAQ61_001591	KAH9878320.1	148	hypothetical protein IAQ61_001591
Un	JACTNS010000005.1	45544	47121	+			IAQ61_001592	KAH9878321.1	313	hypothetical protein IAQ61_001592, partial
Un	JACTNS010000005.1	52605	55034	+			IAQ61_001593	KAH9878322.1	809	hypothetical protein IAQ61_001593
Un	JACTNS010000005.1	55569	56026	-			IAQ61_001594	KAH9878323.1	131	hypothetical protein IAQ61_001594
Un	JACTNS010000005.1	56606	56815	+			IAQ61_001595	KAH9878324.1	69	hypothetical protein IAQ61_001595
Un	JACTNS010000005.1	56965	59003	+			IAQ61_001596	KAH9878325.1	492	hypothetical protein IAQ61_001596
Un	JACTNS010000005.1	59110	60955	-			IAQ61_001597	KAH9878326.1	559	hypothetical protein IAQ61_001597
Un	JACTNS010000005.1	63310	64980	-		CYT1	IAQ61_001598	KAH9878327.1	415	cytochrome c1
Un	JACTNS010000005.1	67557	70343	+			IAQ61_001599	KAH9878328.1	887	hypothetical protein IAQ61_001599
Un	JACTNS010000005.1	70698	72833	+			IAQ61_001600	KAH9878329.1	638	hypothetical protein IAQ61_001600
Un	JACTNS010000005.1	73091	75536	-			IAQ61_001601	KAH9878330.1	662	hypothetical protein IAQ61_001601, partial
Un	JACTNS010000005.1	76792	77103	-			IAQ61_001602	KAH9878331.1	103	hypothetical protein IAQ61_001602
Un	JACTNS010000005.1	78411	79574	-			IAQ61_001603	KAH9878332.1	387	hypothetical protein IAQ61_001603
Un	JACTNS010000005.1	80321	82790	-		PRT1	IAQ61_001604	KAH9878333.1	780	Translation initiation factor 3 subunit b, partial
Un	JACTNS010000005.1	83040	83285	-			IAQ61_001605	KAH9878334.1	81	hypothetical protein IAQ61_001605
Un	JACTNS010000005.1	83418	87153	-			IAQ61_001606	KAH9878335.1	1154	hypothetical protein IAQ61_001606
Un	JACTNS010000005.1	88734	89765	+			IAQ61_001607	KAH9878336.1	343	hypothetical protein IAQ61_001607
Un	JACTNS010000005.1	89939	91123	-			IAQ61_001608	KAH9878337.1	394	hypothetical protein IAQ61_001608
Un	JACTNS010000005.1	92436	93611	-			IAQ61_001609	KAH9878338.1	391	hypothetical protein IAQ61_001609
Un	JACTNS010000005.1	94203	95104	+			IAQ61_001610	KAH9878339.1	282	hypothetical protein IAQ61_001610
Un	JACTNS010000005.1	95694	97520	-			IAQ61_001611	KAH9878340.1	608	hypothetical protein IAQ61_001611
Un	JACTNS010000005.1	97951	99242	+		RPT4	IAQ61_001612	KAH9878341.1	393	26S proteasome subunit rpt4
Un	JACTNS010000005.1	100075	102906	+			IAQ61_001613	KAH9878342.1	926	hypothetical protein IAQ61_001613, partial
Un	JACTNS010000005.1	103275	103454	-			IAQ61_001614	KAH9878343.1	59	hypothetical protein IAQ61_001614
Un	JACTNS010000005.1	105340	108511	+		ATG1	IAQ61_001615	KAH9878344.1	978	Serine/threonine-protein kinase
Un	JACTNS010000005.1	109531	110316	-			IAQ61_001616	KAH9878345.1	164	hypothetical protein IAQ61_001616, partial
Un	JACTNS010000005.1	113197	114889	-			IAQ61_001617	KAH9878346.1	547	hypothetical protein IAQ61_001617
Un	JACTNS010000005.1	116068	117924	+			IAQ61_001618	KAH9878347.1	566	hypothetical protein IAQ61_001618
Un	JACTNS010000005.1	118358	119794	+			IAQ61_001619	KAH9878348.1	478	hypothetical protein IAQ61_001619
Un	JACTNS010000005.1	119864	122161	-			IAQ61_001620	KAH9878349.1	765	hypothetical protein IAQ61_001620
Un	JACTNS010000005.1	123135	125650	+			IAQ61_001621	KAH9878350.1	821	hypothetical protein IAQ61_001621
Un	JACTNS010000005.1	126857	128438	+			IAQ61_001622	KAH9878351.1	453	hypothetical protein IAQ61_001622
Un	JACTNS010000005.1	128886	129349	-			IAQ61_001623	KAH9878352.1	123	hypothetical protein IAQ61_001623, partial
Un	JACTNS010000005.1	131385	133663	+			IAQ61_001624	KAH9878353.1	726	hypothetical protein IAQ61_001624
Un	JACTNS010000005.1	135192	136815	+			IAQ61_001625	KAH9878354.1	141	hypothetical protein IAQ61_001625
Un	JACTNS010000005.1	139588	140196	+			IAQ61_001626	KAH9878355.1	202	hypothetical protein IAQ61_001626
Un	JACTNS010000005.1	140249	140620	+			IAQ61_001627	KAH9878356.1	123	hypothetical protein IAQ61_001627
Un	JACTNS010000005.1	141652	142230	+			IAQ61_001629	KAH9878357.1	75	hypothetical protein IAQ61_001629
Un	JACTNS010000005.1	145658	146134	+			IAQ61_001630	KAH9878358.1	158	hypothetical protein IAQ61_001630
Un	JACTNS010000005.1	148955	149149	+			IAQ61_001631	KAH9878359.1	64	hypothetical protein IAQ61_001631
Un	JACTNS010000005.1	149459	149644	+			IAQ61_001632	KAH9878360.1	61	hypothetical protein IAQ61_001632
Un	JACTNS010000005.1	149892	150301	-			IAQ61_001633	KAH9878361.1	105	hypothetical protein IAQ61_001633
Un	JACTNS010000005.1	151967	152185	+			IAQ61_001634	KAH9878362.1	72	hypothetical protein IAQ61_001634
Un	JACTNS010000005.1	152752	153208	-			IAQ61_001635	KAH9878363.1	103	hypothetical protein IAQ61_001635
Un	JACTNS010000005.1	153953	155444	+			IAQ61_001636	KAH9878364.1	446	hypothetical protein IAQ61_001636
Un	JACTNS010000005.1	155683	156379	+			IAQ61_001637	KAH9878365.1	213	hypothetical protein IAQ61_001637
Un	JACTNS010000005.1	156514	157216	-			IAQ61_001638	KAH9878366.1	217	hypothetical protein IAQ61_001638
Un	JACTNS010000005.1	158581	160236	-			IAQ61_001639	KAH9878367.1	551	hypothetical protein IAQ61_001639
Un	JACTNS010000005.1	161560	162210	-			IAQ61_001640	KAH9878368.1	199	hypothetical protein IAQ61_001640
Un	JACTNS010000005.1	162610	163467	-			IAQ61_001641	KAH9878369.1	267	hypothetical protein IAQ61_001641
Un	JACTNS010000005.1	164163	165673	+			IAQ61_001642	KAH9878370.1	449	hypothetical protein IAQ61_001642
Un	JACTNS010000005.1	169289	169642	-			IAQ61_001643	KAH9878371.1	117	hypothetical protein IAQ61_001643
Un	JACTNS010000005.1	172201	173943	-			IAQ61_001644	KAH9878372.1	580	hypothetical protein IAQ61_001644
Un	JACTNS010000005.1	174313	175368	-			IAQ61_001645	KAH9878373.1	351	hypothetical protein IAQ61_001645
Un	JACTNS010000005.1	175996	176637	+			IAQ61_001646	KAH9878374.1	213	hypothetical protein IAQ61_001646
Un	JACTNS010000005.1	178402	178605	+			IAQ61_001647	KAH9878375.1	67	hypothetical protein IAQ61_001647
Un	JACTNS010000005.1	179200	180007	-			IAQ61_001648	KAH9878376.1	214	hypothetical protein IAQ61_001648, partial
Un	JACTNS010000005.1	180322	180761	+			IAQ61_001649	KAH9878377.1	102	hypothetical protein IAQ61_001649
Un	JACTNS010000005.1	180911	183293	-			IAQ61_001650	KAH9878378.1	757	hypothetical protein IAQ61_001650
Un	JACTNS010000005.1	183586	184292	-			IAQ61_001651	KAH9878379.1	160	hypothetical protein IAQ61_001651
Un	JACTNS010000005.1	184752	185501	+			IAQ61_001652	KAH9878380.1	249	hypothetical protein IAQ61_001652
Un	JACTNS010000005.1	185763	187787	+			IAQ61_001653	KAH9878381.1	674	hypothetical protein IAQ61_001653
Un	JACTNS010000005.1	189200	194154	-			IAQ61_001654	KAH9878382.1	1618	hypothetical protein IAQ61_001654
Un	JACTNS010000005.1	194144	194581	+			IAQ61_001655	KAH9878383.1	145	hypothetical protein IAQ61_001655
Un	JACTNS010000005.1	197163	197813	+			IAQ61_001656	KAH9878384.1	216	hypothetical protein IAQ61_001656
Un	JACTNS010000005.1	197850	198748	+			IAQ61_001657	KAH9878385.1	241	hypothetical protein IAQ61_001657
Un	JACTNS010000005.1	199271	200959	-			IAQ61_001658	KAH9878386.1	562	hypothetical protein IAQ61_001658
Un	JACTNS010000005.1	202322	204313	+			IAQ61_001659	KAH9878387.1	663	hypothetical protein IAQ61_001659
Un	JACTNS010000005.1	205534	208929	-			IAQ61_001660	KAH9878388.1	1131	hypothetical protein IAQ61_001660
Un	JACTNS010000005.1	210559	211115	+			IAQ61_001661	KAH9878389.1	169	hypothetical protein IAQ61_001661, partial
Un	JACTNS010000005.1	211374	212658	-			IAQ61_001662	KAH9878390.1	361	hypothetical protein IAQ61_001662
Un	JACTNS010000005.1	213396	213788	+			IAQ61_001663	KAH9878391.1	130	hypothetical protein IAQ61_001663
Un	JACTNS010000005.1	214793	215143	+			IAQ61_001664	KAH9878392.1	116	hypothetical protein IAQ61_001664
Un	JACTNS010000005.1	218707	220707	+			IAQ61_001665	KAH9878393.1	666	hypothetical protein IAQ61_001665
Un	JACTNS010000005.1	221261	224009	-			IAQ61_001666	KAH9878394.1	898	hypothetical protein IAQ61_001666
Un	JACTNS010000005.1	224350	226369	+			IAQ61_001667	KAH9878395.1	618	hypothetical protein IAQ61_001667
Un	JACTNS010000005.1	229052	231941	+			IAQ61_001668	KAH9878396.1	942	hypothetical protein IAQ61_001668
Un	JACTNS010000005.1	235172	237175	+			IAQ61_001669	KAH9878397.1	646	hypothetical protein IAQ61_001669
Un	JACTNS010000005.1	237520	239184	-			IAQ61_001670	KAH9878398.1	554	hypothetical protein IAQ61_001670
Un	JACTNS010000005.1	239570	241356	+		CCT2	IAQ61_001671	KAH9878399.1	528	T-complex protein 1 subunit beta
Un	JACTNS010000005.1	243616	247251	+			IAQ61_001672	KAH9878400.1	1211	hypothetical protein IAQ61_001672
Un	JACTNS010000005.1	247510	249093	-			IAQ61_001673	KAH9878401.1	527	hypothetical protein IAQ61_001673
Un	JACTNS010000005.1	249452	250198	+			IAQ61_001674	KAH9878402.1	248	hypothetical protein IAQ61_001674
Un	JACTNS010000005.1	250956	252043	-			IAQ61_001675	KAH9878403.1	344	hypothetical protein IAQ61_001675
Un	JACTNS010000005.1	253244	254667	-			IAQ61_001676	KAH9878404.1	438	hypothetical protein IAQ61_001676
Un	JACTNS010000005.1	255567	255797	+			IAQ61_001677	KAH9878405.1	76	hypothetical protein IAQ61_001677
Un	JACTNS010000005.1	256192	256736	+		PCB4	IAQ61_001678	KAH9878406.1	156	putative proteasome subunit beta type-4
Un	JACTNS010000005.1	257882	259438	-			IAQ61_001679	KAH9878407.1	463	hypothetical protein IAQ61_001679
Un	JACTNS010000005.1	260859	261811	+			IAQ61_001680	KAH9878408.1	291	hypothetical protein IAQ61_001680
Un	JACTNS010000005.1	262659	264297	+			IAQ61_001681	KAH9878409.1	523	hypothetical protein IAQ61_001681
Un	JACTNS010000005.1	321652	322392	-			IAQ61_001682	KAH9878410.1	246	hypothetical protein IAQ61_001682
Un	JACTNS010000005.1	324278	326836	-			IAQ61_001683	KAH9878411.1	837	hypothetical protein IAQ61_001683
Un	JACTNS010000005.1	327313	328371	-			IAQ61_001684	KAH9878412.1	325	hypothetical protein IAQ61_001684, partial
Un	JACTNS010000005.1	329802	330523	-			IAQ61_001685	KAH9878413.1	200	hypothetical protein IAQ61_001685
Un	JACTNS010000005.1	331159	333827	-			IAQ61_001686	KAH9878414.1	814	hypothetical protein IAQ61_001686
Un	JACTNS010000005.1	334361	338271	+			IAQ61_001687	KAH9878415.1	1249	hypothetical protein IAQ61_001687
Un	JACTNS010000005.1	338616	339360	-		MPC1	IAQ61_001688	KAH9878416.1	142	pyruvate transporter mpc1
Un	JACTNS010000005.1	340013	340882	-			IAQ61_001689	KAH9878417.1	210	hypothetical protein IAQ61_001689
Un	JACTNS010000005.1	341184	341835	+		RPL11	IAQ61_001690	KAH9878418.1	172	60S ribosomal protein L11
Un	JACTNS010000005.1	344037	345638	-			IAQ61_001691	KAH9878419.1	498	hypothetical protein IAQ61_001691
Un	JACTNS010000005.1	345745	346316	+			IAQ61_001692	KAH9878420.1	143	hypothetical protein IAQ61_001692
Un	JACTNS010000005.1	346604	347041	+			IAQ61_001693	KAH9878421.1	145	hypothetical protein IAQ61_001693
Un	JACTNS010000005.1	349198	350117	-			IAQ61_001694	KAH9878422.1	220	hypothetical protein IAQ61_001694
Un	JACTNS010000005.1	350399	351085	-			IAQ61_001695	KAH9878423.1	228	hypothetical protein IAQ61_001695
Un	JACTNS010000005.1	351832	352722	-			IAQ61_001696	KAH9878424.1	276	hypothetical protein IAQ61_001696
Un	JACTNS010000005.1	352961	355155	+			IAQ61_001697	KAH9878425.1	537	hypothetical protein IAQ61_001697
Un	JACTNS010000005.1	355757	357108	-			IAQ61_001698	KAH9878426.1	411	Glycerol-3-phosphate dehydrogenase
Un	JACTNS010000005.1	358343	359032	-			IAQ61_001699	KAH9878427.1	209	hypothetical protein IAQ61_001699
Un	JACTNS010000005.1	359140	359859	+			IAQ61_001700	KAH9878428.1	239	hypothetical protein IAQ61_001700
Un	JACTNS010000005.1	360267	360963	+			IAQ61_001701	KAH9878429.1	174	hypothetical protein IAQ61_001701
Un	JACTNS010000005.1	361242	361594	+			IAQ61_001702	KAH9878430.1	83	hypothetical protein IAQ61_001702
Un	JACTNS010000005.1	362460	365702	+			IAQ61_001703	KAH9878431.1	1062	hypothetical protein IAQ61_001703
Un	JACTNS010000005.1	383543	385690	+			IAQ61_001704	KAH9878432.1	610	hypothetical protein IAQ61_001704
Un	JACTNS010000005.1	386649	388607	+			IAQ61_001705	KAH9878433.1	652	hypothetical protein IAQ61_001705
Un	JACTNS010000005.1	389488	394359	-			IAQ61_001706	KAH9878434.1	1527	hypothetical protein IAQ61_001706
Un	JACTNS010000005.1	395496	397842	-			IAQ61_001707	KAH9878435.1	763	hypothetical protein IAQ61_001707
Un	JACTNS010000005.1	398365	399219	+		PNO1	IAQ61_001708	KAH9878436.1	257	pre-rRNA-processing protein pno1
Un	JACTNS010000005.1	399590	401941	-			IAQ61_001709	KAH9878437.1	783	hypothetical protein IAQ61_001709
Un	JACTNS010000005.1	402888	404598	-			IAQ61_001710	KAH9878438.1	548	hypothetical protein IAQ61_001710
Un	JACTNS010000005.1	406821	407516	-			IAQ61_001711	KAH9878439.1	120	hypothetical protein IAQ61_001711, partial
Un	JACTNS010000005.1	409326	409586	-			IAQ61_001712	KAH9878440.1	86	hypothetical protein IAQ61_001712
Un	JACTNS010000005.1	411099	411338	-			IAQ61_001713	KAH9878441.1	79	hypothetical protein IAQ61_001713
Un	JACTNS010000005.1	411685	413473	-			IAQ61_001714	KAH9878442.1	578	hypothetical protein IAQ61_001714, partial
Un	JACTNS010000005.1	413480	414001	-			IAQ61_001715	KAH9878443.1	149	hypothetical protein IAQ61_001715
Un	JACTNS010000005.1	414046	415165	+			IAQ61_001716	KAH9878444.1	333	hypothetical protein IAQ61_001716
Un	JACTNS010000005.1	415226	415593	-			IAQ61_001717	KAH9878445.1	104	hypothetical protein IAQ61_001717
Un	JACTNS010000005.1	415793	416369	-		RPL36	IAQ61_001718	KAH9878446.1	106	60S ribosomal protein L36
Un	JACTNS010000005.1	416745	417696	-			IAQ61_001719	KAH9878447.1	289	hypothetical protein IAQ61_001719
Un	JACTNS010000005.1	418040	419920	+			IAQ61_001720	KAH9878448.1	555	hypothetical protein IAQ61_001720
Un	JACTNS010000005.1	461465	462021	+			IAQ61_001721	KAH9878449.1	163	hypothetical protein IAQ61_001721
Un	JACTNS010000005.1	462478	463815	-			IAQ61_001722	KAH9878450.1	416	hypothetical protein IAQ61_001722
Un	JACTNS010000005.1	464650	465140	+			IAQ61_001723	KAH9878451.1	115	hypothetical protein IAQ61_001723
Un	JACTNS010000005.1	466089	470805	-			IAQ61_001724	KAH9878452.1	1462	hypothetical protein IAQ61_001724
Un	JACTNS010000005.1	471127	472707	+			IAQ61_001725	KAH9878453.1	526	hypothetical protein IAQ61_001725
Un	JACTNS010000005.1	472933	476981	-			IAQ61_001726	KAH9878454.1	1268	hypothetical protein IAQ61_001726
Un	JACTNS010000005.1	478583	480881	+			IAQ61_001727	KAH9878455.1	747	hypothetical protein IAQ61_001727
Un	JACTNS010000005.1	482690	485043	+		GFA1	IAQ61_001728	KAH9878456.1	693	glutamine--fructose-6-phosphate transaminase (isomerizing)
Un	JACTNS010000005.1	485522	486305	+			IAQ61_001729	KAH9878457.1	211	hypothetical protein IAQ61_001729
Un	JACTNS010000005.1	487769	491445	+			IAQ61_001730	KAH9878458.1	1163	hypothetical protein IAQ61_001730
Un	JACTNS010000005.1	492268	493529	+			IAQ61_001731	KAH9878459.1	356	hypothetical protein IAQ61_001731
Un	JACTNS010000005.1	494516	495928	+			IAQ61_001732	KAH9878460.1	390	hypothetical protein IAQ61_001732
Un	JACTNS010000005.1	496452	497098	-			IAQ61_001733	KAH9878461.1	176	hypothetical protein IAQ61_001733
Un	JACTNS010000005.1	498559	500446	+			IAQ61_001734	KAH9878462.1	531	hypothetical protein IAQ61_001734
Un	JACTNS010000005.1	503663	505103	-			IAQ61_001735	KAH9878463.1	459	hypothetical protein IAQ61_001735
Un	JACTNS010000005.1	505692	506670	-			IAQ61_001736	KAH9878464.1	291	hypothetical protein IAQ61_001736, partial
Un	JACTNS010000005.1	507384	511092	+			IAQ61_001737	KAH9878465.1	1220	hypothetical protein IAQ61_001737, partial
Un	JACTNS010000005.1	524911	526040	+			IAQ61_001738	KAH9878466.1	329	hypothetical protein IAQ61_001738
Un	JACTNS010000005.1	526184	527772	-			IAQ61_001739	KAH9878467.1	493	hypothetical protein IAQ61_001739
Un	JACTNS010000005.1	528171	531017	+			IAQ61_001740	KAH9878468.1	873	hypothetical protein IAQ61_001740, partial
Un	JACTNS010000005.1	531320	532939	-			IAQ61_001741	KAH9878469.1	539	hypothetical protein IAQ61_001741
Un	JACTNS010000005.1	534649	539998	+			IAQ61_001742	KAH9878470.1	1692	hypothetical protein IAQ61_001742
Un	JACTNS010000005.1	540595	545352	-			IAQ61_001743	KAH9878471.1	1561	hypothetical protein IAQ61_001743
Un	JACTNS010000005.1	546829	550062	-			IAQ61_001744	KAH9878472.1	833	hypothetical protein IAQ61_001744
Un	JACTNS010000005.1	551689	551874	-			IAQ61_001745	KAH9878473.1	61	hypothetical protein IAQ61_001745
Un	JACTNS010000005.1	551964	552591	+			IAQ61_001746	KAH9878474.1	186	hypothetical protein IAQ61_001746
Un	JACTNS010000005.1	553490	554999	+			IAQ61_001747	KAH9878475.1	468	hypothetical protein IAQ61_001747
Un	JACTNS010000005.1	555611	556561	-			IAQ61_001748	KAH9878476.1	258	hypothetical protein IAQ61_001748
Un	JACTNS010000005.1	557323	559916	+			IAQ61_001749	KAH9878477.1	829	hypothetical protein IAQ61_001749
Un	JACTNS010000005.1	560105	561174	-			IAQ61_001750	KAH9878478.1	338	hypothetical protein IAQ61_001750
Un	JACTNS010000005.1	562686	564854	-			IAQ61_001751	KAH9878479.1	660	hypothetical protein IAQ61_001751
Un	JACTNS010000005.1	565723	566107	-			IAQ61_001752	KAH9878480.1	95	hypothetical protein IAQ61_001752
Un	JACTNS010000005.1	568233	569303	-			IAQ61_001753	KAH9878481.1	295	hypothetical protein IAQ61_001753
Un	JACTNS010000005.1	570030	573382	+			IAQ61_001754	KAH9878482.1	660	hypothetical protein IAQ61_001754
Un	JACTNS010000005.1	575024	576465	+			IAQ61_001755	KAH9878483.1	341	hypothetical protein IAQ61_001755
Un	JACTNS010000005.1	577231	578730	-			IAQ61_001756	KAH9878484.1	437	hypothetical protein IAQ61_001756
Un	JACTNS010000005.1	580596	583108	-			IAQ61_001757	KAH9878485.1	809	hypothetical protein IAQ61_001757
Un	JACTNS010000005.1	583563	584327	-			IAQ61_001758	KAH9878486.1	221	hypothetical protein IAQ61_001758
Un	JACTNS010000005.1	584614	585298	-			IAQ61_001759	KAH9878487.1	210	hypothetical protein IAQ61_001759
Un	JACTNS010000005.1	585544	586917	+			IAQ61_001760	KAH9878488.1	457	hypothetical protein IAQ61_001760
Un	JACTNS010000005.1	587161	588804	-			IAQ61_001761	KAH9878489.1	547	hypothetical protein IAQ61_001761
Un	JACTNS010000005.1	588917	590106	+			IAQ61_001762	KAH9878490.1	357	hypothetical protein IAQ61_001762
Un	JACTNS010000005.1	591382	592608	+			IAQ61_001763	KAH9878491.1	408	hypothetical protein IAQ61_001763
Un	JACTNS010000005.1	593256	594043	-			IAQ61_001764	KAH9878492.1	217	hypothetical protein IAQ61_001764, partial
Un	JACTNS010000005.1	594133	595386	+			IAQ61_001765	KAH9878493.1	417	hypothetical protein IAQ61_001765
Un	JACTNS010000005.1	596026	600475	-			IAQ61_001766	KAH9878494.1	1196	hypothetical protein IAQ61_001766
Un	JACTNS010000005.1	602179	607656	-			IAQ61_001767	KAH9878495.1	1685	hypothetical protein IAQ61_001767
Un	JACTNS010000005.1	608398	611300	-			IAQ61_001768	KAH9878496.1	929	hypothetical protein IAQ61_001768
Un	JACTNS010000005.1	611388	611672	-			IAQ61_001769	KAH9878497.1	94	hypothetical protein IAQ61_001769
Un	JACTNS010000005.1	611967	612983	+			IAQ61_001770	KAH9878498.1	228	hypothetical protein IAQ61_001770
Un	JACTNS010000005.1	613647	615372	+		MT2	IAQ61_001771	KAH9878499.1	506	Sphingolipid C9-methyltransferase 2
Un	JACTNS010000005.1	616593	618000	-			IAQ61_001772	KAH9878500.1	439	hypothetical protein IAQ61_001772
Un	JACTNS010000005.1	618805	620515	-		GCD11	IAQ61_001773	KAH9878501.1	500	eukaryotic translation initiation factor 2 subunit gamma
Un	JACTNS010000005.1	621194	621586	-			IAQ61_001774	KAH9878502.1	130	hypothetical protein IAQ61_001774
Un	JACTNS010000005.1	621794	622388	+			IAQ61_001775	KAH9878503.1	152	hypothetical protein IAQ61_001775
Un	JACTNS010000005.1	622729	624287	-		YTM1	IAQ61_001776	KAH9878504.1	471	ribosome biogenesis protein ytm1
Un	JACTNS010000005.1	624664	627287	-			IAQ61_001777	KAH9878505.1	854	hypothetical protein IAQ61_001777
Un	JACTNS010000005.1	628033	631352	+			IAQ61_001778	KAH9878506.1	1048	hypothetical protein IAQ61_001778
Un	JACTNS010000005.1	631909	637406	-			IAQ61_001779	KAH9878507.1	1816	hypothetical protein IAQ61_001779, partial
Un	JACTNS010000005.1	638962	640424	-			IAQ61_001780	KAH9878508.1	468	hypothetical protein IAQ61_001780
Un	JACTNS010000005.1	640780	641490	+			IAQ61_001781	KAH9878509.1	161	hypothetical protein IAQ61_001781
Un	JACTNS010000005.1	641902	642701	-			IAQ61_001782	KAH9878510.1	221	hypothetical protein IAQ61_001782
Un	JACTNS010000005.1	642996	644288	-			IAQ61_001783	KAH9878511.1	430	hypothetical protein IAQ61_001783
Un	JACTNS010000005.1	645687	648410	+			IAQ61_001784	KAH9878512.1	839	hypothetical protein IAQ61_001784
Un	JACTNS010000005.1	648867	649070	-			IAQ61_001785	KAH9878513.1	67	hypothetical protein IAQ61_001785
Un	JACTNS010000005.1	649256	649888	+			IAQ61_001786	KAH9878514.1	210	hypothetical protein IAQ61_001786
Un	JACTNS010000005.1	650493	654500	+			IAQ61_001787	KAH9878515.1	1283	hypothetical protein IAQ61_001787
Un	JACTNS010000005.1	655570	657853	-			IAQ61_001788	KAH9878516.1	740	hypothetical protein IAQ61_001788
Un	JACTNS010000005.1	657949	658242	+			IAQ61_001789	KAH9878517.1	97	hypothetical protein IAQ61_001789
Un	JACTNS010000005.1	659180	663202	-			IAQ61_001790	KAH9878518.1	1119	hypothetical protein IAQ61_001790
Un	JACTNS010000005.1	663974	664369	-			IAQ61_001791	KAH9878519.1	131	hypothetical protein IAQ61_001791
Un	JACTNS010000005.1	665388	665940	+			IAQ61_001792	KAH9878520.1	126	hypothetical protein IAQ61_001792, partial
Un	JACTNS010000005.1	666616	667663	-			IAQ61_001793	KAH9878521.1	282	hypothetical protein IAQ61_001793
Un	JACTNS010000005.1	667662	668021	+			IAQ61_001794	KAH9878522.1	119	hypothetical protein IAQ61_001794
Un	JACTNS010000005.1	668628	671539	-			IAQ61_001795	KAH9878523.1	919	hypothetical protein IAQ61_001795
Un	JACTNS010000005.1	672112	672711	-			IAQ61_001796	KAH9878524.1	159	hypothetical protein IAQ61_001796
Un	JACTNS010000005.1	673123	674176	-			IAQ61_001797	KAH9878525.1	266	hypothetical protein IAQ61_001797, partial
Un	JACTNS010000005.1	675569	675868	+			IAQ61_001798	KAH9878526.1	99	hypothetical protein IAQ61_001798
Un	JACTNS010000005.1	678467	678964	+			IAQ61_001799	KAH9878527.1	135	hypothetical protein IAQ61_001799
Un	JACTNS010000005.1	679909	680109	-			IAQ61_001800	KAH9878528.1	66	hypothetical protein IAQ61_001800
Un	JACTNS010000005.1	680231	681464	+			IAQ61_001801	KAH9878529.1	369	hypothetical protein IAQ61_001801
Un	JACTNS010000005.1	681664	684290	-			IAQ61_001802	KAH9878530.1	855	hypothetical protein IAQ61_001802
Un	JACTNS010000005.1	684730	685298	+		LSM5	IAQ61_001803	KAH9878531.1	84	RNA-binding protein lsm5
Un	JACTNS010000005.1	685950	686726	-			IAQ61_001804	KAH9878532.1	182	hypothetical protein IAQ61_001804, partial
Un	JACTNS010000005.1	688738	690503	+			IAQ61_001805	KAH9878533.1	490	hypothetical protein IAQ61_001805
Un	JACTNS010000005.1	691558	693841	+			IAQ61_001806	KAH9878534.1	490	hypothetical protein IAQ61_001806
Un	JACTNS010000005.1	694545	698802	+			IAQ61_001807	KAH9878535.1	1377	hypothetical protein IAQ61_001807
Un	JACTNS010000005.1	699339	700207	+		PMM1	IAQ61_001808	KAH9878536.1	270	Phosphomannomutase 1
Un	JACTNS010000005.1	700521	701249	-			IAQ61_001809	KAH9878537.1	242	hypothetical protein IAQ61_001809
Un	JACTNS010000005.1	701620	702783	+			IAQ61_001810	KAH9878538.1	364	hypothetical protein IAQ61_001810
Un	JACTNS010000005.1	703397	706171	-			IAQ61_001811	KAH9878539.1	826	hypothetical protein IAQ61_001811
Un	JACTNS010000005.1	707090	707841	+			IAQ61_001812	KAH9878540.1	229	hypothetical protein IAQ61_001812
Un	JACTNS010000005.1	708464	709881	-			IAQ61_001813	KAH9878541.1	414	hypothetical protein IAQ61_001813
Un	JACTNS010000005.1	710217	711232	-			IAQ61_001814	KAH9878542.1	263	hypothetical protein IAQ61_001814
Un	JACTNS010000005.1	711452	712355	+			IAQ61_001815	KAH9878543.1	280	hypothetical protein IAQ61_001815
Un	JACTNS010000005.1	712643	714043	-		IDH1	IAQ61_001816	KAH9878544.1	384	isocitrate dehydrogenase (NAD(+)) idh1
Un	JACTNS010000005.1	714715	715466	+			IAQ61_001817	KAH9878545.1	201	hypothetical protein IAQ61_001817
Un	JACTNS010000005.1	715504	716715	+			IAQ61_001818	KAH9878546.1	359	hypothetical protein IAQ61_001818
Un	JACTNS010000005.1	717226	717759	-			IAQ61_001819	KAH9878547.1	91	hypothetical protein IAQ61_001819
Un	JACTNS010000005.1	718075	718533	+		RPL38	IAQ61_001820	KAH9878548.1	83	60S ribosomal protein L38
Un	JACTNS010000005.1	718796	719839	-			IAQ61_001821	KAH9878549.1	347	hypothetical protein IAQ61_001821
Un	JACTNS010000005.1	720016	722713	+			IAQ61_001822	KAH9878550.1	833	hypothetical protein IAQ61_001822, partial
Un	JACTNS010000005.1	723166	724312	-			IAQ61_001823	KAH9878551.1	280	hypothetical protein IAQ61_001823
Un	JACTNS010000005.1	724853	726256	-			IAQ61_001824	KAH9878552.1	373	hypothetical protein IAQ61_001824
Un	JACTNS010000005.1	726791	727495	+			IAQ61_001825	KAH9878553.1	182	hypothetical protein IAQ61_001825
Un	JACTNS010000005.1	728701	730560	+			IAQ61_001826	KAH9878554.1	518	hypothetical protein IAQ61_001826
Un	JACTNS010000005.1	730580	731002	-			IAQ61_001827	KAH9878555.1	140	hypothetical protein IAQ61_001827
Un	JACTNS010000005.1	731487	732145	-			IAQ61_001828	KAH9878556.1	196	hypothetical protein IAQ61_001828
Un	JACTNS010000005.1	732882	734403	+			IAQ61_001829	KAH9878557.1	476	hypothetical protein IAQ61_001829
Un	JACTNS010000005.1	736072	737672	-			IAQ61_001830	KAH9878558.1	507	hypothetical protein IAQ61_001830
Un	JACTNS010000005.1	738804	740304	+		MRI1	IAQ61_001831	KAH9878559.1	470	S-methyl-5-thioribose-1-phosphate isomerase
Un	JACTNS010000005.1	740570	740879	-			IAQ61_001832	KAH9878560.1	82	hypothetical protein IAQ61_001832
Un	JACTNS010000005.1	741190	745561	+			IAQ61_001833	KAH9878561.1	1409	hypothetical protein IAQ61_001833
Un	JACTNS010000005.1	746136	749256	+			IAQ61_001834	KAH9878562.1	932	hypothetical protein IAQ61_001834
Un	JACTNS010000005.1	750384	751703	+			IAQ61_001835	KAH9878563.1	439	hypothetical protein IAQ61_001835
Un	JACTNS010000005.1	751789	752396	-			IAQ61_001836	KAH9878564.1	178	hypothetical protein IAQ61_001836
Un	JACTNS010000005.1	753373	754170	+			IAQ61_001837	KAH9878565.1	265	hypothetical protein IAQ61_001837
Un	JACTNS010000005.1	754771	756234	+			IAQ61_001838	KAH9878566.1	487	hypothetical protein IAQ61_001838
Un	JACTNS010000005.1	756608	757623	-			IAQ61_001839	KAH9878567.1	321	hypothetical protein IAQ61_001839
Un	JACTNS010000005.1	757867	758094	+			IAQ61_001840	KAH9878568.1	75	hypothetical protein IAQ61_001840
Un	JACTNS010000005.1	759783	762854	+			IAQ61_001841	KAH9878569.1	1023	hypothetical protein IAQ61_001841
Un	JACTNS010000005.1	763329	763574	+			IAQ61_001842	KAH9878570.1	81	hypothetical protein IAQ61_001842
Un	JACTNS010000005.1	764273	765674	+		SPE1	IAQ61_001843	KAH9878571.1	442	Ornithine decarboxylase
Un	JACTNS010000005.1	767155	770952	+			IAQ61_001844	KAH9878572.1	1232	hypothetical protein IAQ61_001844
Un	JACTNS010000005.1	771348	772299	+			IAQ61_001845	KAH9878573.1	275	hypothetical protein IAQ61_001845
Un	JACTNS010000005.1	774188	775624	+			IAQ61_001846	KAH9878574.1	285	hypothetical protein IAQ61_001846
Un	JACTNS010000005.1	777004	777873	+			IAQ61_001847	KAH9878575.1	289	hypothetical protein IAQ61_001847
Un	JACTNS010000005.1	778160	780185	-			IAQ61_001848	KAH9878576.1	585	hypothetical protein IAQ61_001848
Un	JACTNS010000005.1	781447	782780	-			IAQ61_001849	KAH9878577.1	199	hypothetical protein IAQ61_001849
Un	JACTNS010000005.1	783887	786358	-			IAQ61_001850	KAH9878578.1	823	hypothetical protein IAQ61_001850
Un	JACTNS010000005.1	786537	786839	+			IAQ61_001851	KAH9878579.1	100	hypothetical protein IAQ61_001851
Un	JACTNS010000005.1	788705	789452	-			IAQ61_001852	KAH9878580.1	159	hypothetical protein IAQ61_001852
Un	JACTNS010000005.1	791452	793566	+			IAQ61_001853	KAH9878581.1	662	hypothetical protein IAQ61_001853
Un	JACTNS010000005.1	795187	796371	+			IAQ61_001854	KAH9878582.1	394	hypothetical protein IAQ61_001854
Un	JACTNS010000005.1	797154	799286	+			IAQ61_001855	KAH9878583.1	560	hypothetical protein IAQ61_001855
Un	JACTNS010000005.1	800119	801075	-			IAQ61_001856	KAH9878584.1	97	hypothetical protein IAQ61_001856
Un	JACTNS010000005.1	801771	802872	+			IAQ61_001857	KAH9878585.1	319	hypothetical protein IAQ61_001857
Un	JACTNS010000005.1	804405	804974	-			IAQ61_001858	KAH9878586.1	189	hypothetical protein IAQ61_001858
Un	JACTNS010000005.1	805529	807607	+			IAQ61_001859	KAH9878587.1	629	hypothetical protein IAQ61_001859
Un	JACTNS010000005.1	808835	809083	-			IAQ61_001860	KAH9878588.1	82	hypothetical protein IAQ61_001860
Un	JACTNS010000005.1	809136	809864	-			IAQ61_001861	KAH9878589.1	242	hypothetical protein IAQ61_001861
Un	JACTNS010000005.1	810201	810875	-			IAQ61_001862	KAH9878590.1	130	hypothetical protein IAQ61_001862
Un	JACTNS010000005.1	811003	812007	+			IAQ61_001863	KAH9878591.1	334	hypothetical protein IAQ61_001863
Un	JACTNS010000005.1	812051	812374	+			IAQ61_001864	KAH9878592.1	107	hypothetical protein IAQ61_001864
Un	JACTNS010000005.1	813020	813936	-			IAQ61_001865	KAH9878593.1	249	hypothetical protein IAQ61_001865
Un	JACTNS010000005.1	814113	815967	+			IAQ61_001866	KAH9878594.1	568	hypothetical protein IAQ61_001866
Un	JACTNS010000005.1	816701	817749	+			IAQ61_001867	KAH9878595.1	290	hypothetical protein IAQ61_001867
Un	JACTNS010000005.1	818547	819061	-			IAQ61_001868	KAH9878596.1	152	hypothetical protein IAQ61_001868
Un	JACTNS010000005.1	819552	820541	-			IAQ61_001869	KAH9878597.1	295	hypothetical protein IAQ61_001869
Un	JACTNS010000005.1	820961	821143	+			IAQ61_001870	KAH9878598.1	60	hypothetical protein IAQ61_001870
Un	JACTNS010000005.1	821385	821717	+			IAQ61_001871	KAH9878599.1	74	hypothetical protein IAQ61_001871
Un	JACTNS010000005.1	821730	822701	-			IAQ61_001872	KAH9878600.1	306	hypothetical protein IAQ61_001872
Un	JACTNS010000005.1	823420	823794	-			IAQ61_001873	KAH9878601.1	124	hypothetical protein IAQ61_001873
Un	JACTNS010000005.1	824050	825431	-			IAQ61_001874	KAH9878602.1	378	hypothetical protein IAQ61_001874, partial
Un	JACTNS010000005.1	829351	830940	+			IAQ61_001875	KAH9878603.1	529	hypothetical protein IAQ61_001875
Un	JACTNS010000005.1	843117	844254	-			IAQ61_001876	KAH9878604.1	267	hypothetical protein IAQ61_001876
Un	JACTNS010000005.1	845219	845723	-			IAQ61_001877	KAH9878605.1	143	hypothetical protein IAQ61_001877
Un	JACTNS010000005.1	845892	849306	+			IAQ61_001878	KAH9878606.1	1019	hypothetical protein IAQ61_001878
Un	JACTNS010000005.1	851141	854225	-			IAQ61_001879	KAH9878607.1	972	hypothetical protein IAQ61_001879
Un	JACTNS010000005.1	854818	855141	-			IAQ61_001880	KAH9878608.1	107	hypothetical protein IAQ61_001880
Un	JACTNS010000005.1	856082	858801	-			IAQ61_001881	KAH9878609.1	877	hypothetical protein IAQ61_001881
Un	JACTNS010000005.1	861656	863957	+			IAQ61_001882	KAH9878610.1	301	hypothetical protein IAQ61_001882
Un	JACTNS010000005.1	864512	867007	-			IAQ61_001883	KAH9878611.1	831	hypothetical protein IAQ61_001883
Un	JACTNS010000005.1	867594	869665	-			IAQ61_001884	KAH9878612.1	656	hypothetical protein IAQ61_001884, partial
Un	JACTNS010000005.1	870436	872316	+			IAQ61_001885	KAH9878613.1	608	hypothetical protein IAQ61_001885
Un	JACTNS010000005.1	872467	874313	-			IAQ61_001886	KAH9878614.1	543	hypothetical protein IAQ61_001886, partial
Un	JACTNS010000005.1	874704	876350	-			IAQ61_001887	KAH9878615.1	453	hypothetical protein IAQ61_001887
Un	JACTNS010000005.1	878123	879700	-			IAQ61_001888	KAH9878616.1	505	hypothetical protein IAQ61_001888
Un	JACTNS010000005.1	881110	884325	+			IAQ61_001889	KAH9878617.1	1071	hypothetical protein IAQ61_001889
Un	JACTNS010000005.1	884659	885893	-			IAQ61_001890	KAH9878618.1	379	hypothetical protein IAQ61_001890
Un	JACTNS010000005.1	886645	888312	+			IAQ61_001891	KAH9878619.1	555	hypothetical protein IAQ61_001891
Un	JACTNS010000005.1	889008	889705	-			IAQ61_001892	KAH9878620.1	196	hypothetical protein IAQ61_001892
Un	JACTNS010000005.1	889880	890662	-			IAQ61_001893	KAH9878621.1	260	hypothetical protein IAQ61_001893
Un	JACTNS010000005.1	891112	891903	-			IAQ61_001894	KAH9878622.1	246	hypothetical protein IAQ61_001894
Un	JACTNS010000005.1	892945	893703	+			IAQ61_001895	KAH9878623.1	252	hypothetical protein IAQ61_001895
Un	JACTNS010000005.1	894219	895657	+			IAQ61_001896	KAH9878624.1	425	hypothetical protein IAQ61_001896
Un	JACTNS010000005.1	895749	896312	-			IAQ61_001897	KAH9878625.1	155	hypothetical protein IAQ61_001897
Un	JACTNS010000005.1	896407	896907	-			IAQ61_001898	KAH9878626.1	166	hypothetical protein IAQ61_001898
Un	JACTNS010000005.1	898269	898897	-			IAQ61_001899	KAH9878627.1	98	hypothetical protein IAQ61_001899
Un	JACTNS010000005.1	899329	900057	+			IAQ61_001900	KAH9878628.1	206	hypothetical protein IAQ61_001900
Un	JACTNS010000005.1	901879	902292	-			IAQ61_001901	KAH9878629.1	137	hypothetical protein IAQ61_001901
Un	JACTNS010000005.1	902291	902706	+			IAQ61_001902	KAH9878630.1	100	hypothetical protein IAQ61_001902
Un	JACTNS010000005.1	905243	905968	+			IAQ61_001903	KAH9878631.1	221	hypothetical protein IAQ61_001903
Un	JACTNS010000005.1	908334	908741	-			IAQ61_001904	KAH9878632.1	76	hypothetical protein IAQ61_001904
Un	JACTNS010000005.1	909135	910372	+			IAQ61_001905	KAH9878633.1	298	hypothetical protein IAQ61_001905
Un	JACTNS010000005.1	911147	912802	+			IAQ61_001906	KAH9878634.1	497	hypothetical protein IAQ61_001906
Un	JACTNS010000005.1	913041	914563	-			IAQ61_001907	KAH9878635.1	487	hypothetical protein IAQ61_001907, partial
Un	JACTNS010000005.1	914907	916206	+			IAQ61_001908	KAH9878636.1	376	hypothetical protein IAQ61_001908
Un	JACTNS010000005.1	917294	918157	-			IAQ61_001909	KAH9878637.1	287	hypothetical protein IAQ61_001909
Un	JACTNS010000005.1	919082	920658	+			IAQ61_001910	KAH9878638.1	476	hypothetical protein IAQ61_001910
Un	JACTNS010000005.1	920859	921470	-			IAQ61_001911	KAH9878639.1	203	hypothetical protein IAQ61_001911
Un	JACTNS010000005.1	921826	922293	+			IAQ61_001912	KAH9878640.1	138	hypothetical protein IAQ61_001912
Un	JACTNS010000005.1	923109	925666	-			IAQ61_001913	KAH9878641.1	800	hypothetical protein IAQ61_001913
Un	JACTNS010000005.1	926532	926768	-			IAQ61_001914	KAH9878642.1	78	hypothetical protein IAQ61_001914
Un	JACTNS010000005.1	926767	927567	+			IAQ61_001915	KAH9878643.1	243	hypothetical protein IAQ61_001915
Un	JACTNS010000005.1	928221	930119	-			IAQ61_001916	KAH9878644.1	576	hypothetical protein IAQ61_001916
Un	JACTNS010000005.1	931337	933135	+			IAQ61_001917	KAH9878645.1	560	hypothetical protein IAQ61_001917
Un	JACTNS010000005.1	933491	935269	-			IAQ61_001918	KAH9878646.1	569	hypothetical protein IAQ61_001918
Un	JACTNS010000005.1	945072	945625	+			IAQ61_001919	KAH9878647.1	118	hypothetical protein IAQ61_001919
Un	JACTNS010000005.1	945703	946059	+			IAQ61_001920	KAH9878648.1	118	hypothetical protein IAQ61_001920
Un	JACTNS010000005.1	948239	949027	+			IAQ61_001921	KAH9878649.1	262	hypothetical protein IAQ61_001921
Un	JACTNS010000005.1	949630	950691	-			IAQ61_001922	KAH9878650.1	331	hypothetical protein IAQ61_001922
Un	JACTNS010000005.1	951177	954429	+			IAQ61_001923	KAH9878651.1	1049	hypothetical protein IAQ61_001923
Un	JACTNS010000005.1	955006	955334	-			IAQ61_001924	KAH9878652.1	55	hypothetical protein IAQ61_001924
Un	JACTNS010000005.1	957810	961951	-			IAQ61_001925	KAH9878653.1	1096	hypothetical protein IAQ61_001925
Un	JACTNS010000005.1	962832	963020	-			IAQ61_001926	KAH9878654.1	62	hypothetical protein IAQ61_001926
Un	JACTNS010000005.1	963106	964381	+			IAQ61_001927	KAH9878655.1	352	hypothetical protein IAQ61_001927, partial
Un	JACTNS010000005.1	965492	966313	+			IAQ61_001928	KAH9878656.1	273	hypothetical protein IAQ61_001928
Un	JACTNS010000005.1	966539	966808	+			IAQ61_001929	KAH9878657.1	89	hypothetical protein IAQ61_001929
Un	JACTNS010000005.1	967063	968619	-			IAQ61_001930	KAH9878658.1	518	hypothetical protein IAQ61_001930
Un	JACTNS010000005.1	968791	969264	-			IAQ61_001931	KAH9878659.1	142	hypothetical protein IAQ61_001931
Un	JACTNS010000005.1	970198	972927	-			IAQ61_001932	KAH9878660.1	821	hypothetical protein IAQ61_001932
Un	JACTNS010000005.1	973484	975163	+			IAQ61_001933	KAH9878661.1	512	hypothetical protein IAQ61_001933
Un	JACTNS010000005.1	976291	979626	+			IAQ61_001934	KAH9878662.1	1033	hypothetical protein IAQ61_001934
Un	JACTNS010000005.1	980465	981232	-			IAQ61_001935	KAH9878663.1	172	hypothetical protein IAQ61_001935
Un	JACTNS010000005.1	981549	982744	+		PXR1	IAQ61_001936	KAH9878664.1	361	telomerase inhibitor
Un	JACTNS010000005.1	983981	985786	+			IAQ61_001937	KAH9878665.1	561	hypothetical protein IAQ61_001937
Un	JACTNS010000005.1	986312	987749	-			IAQ61_001938	KAH9878666.1	387	hypothetical protein IAQ61_001938
Un	JACTNS010000005.1	1030739	1031332	+			IAQ61_001939	KAH9878667.1	197	hypothetical protein IAQ61_001939
Un	JACTNS010000005.1	1031405	1031662	-			IAQ61_001940	KAH9878668.1	70	hypothetical protein IAQ61_001940
Un	JACTNS010000005.1	1037923	1040901	+			IAQ61_001941	KAH9878669.1	834	hypothetical protein IAQ61_001941, partial
Un	JACTNS010000005.1	1041385	1042297	+			IAQ61_001942	KAH9878670.1	266	hypothetical protein IAQ61_001942
Un	JACTNS010000005.1	1044148	1045158	+		HCR1	IAQ61_001943	KAH9878671.1	280	Translation initiation factor 3 subunit J component
Un	JACTNS010000005.1	1045276	1045479	-			IAQ61_001944	KAH9878672.1	67	hypothetical protein IAQ61_001944
Un	JACTNS010000005.1	1046913	1048073	+		HIS1	IAQ61_001946	KAH9878673.1	344	ATP phosphoribosyltransferase (ATP-PRTase) (ATP-PRT)
Un	JACTNS010000005.1	1048548	1049123	-			IAQ61_001947	KAH9878674.1	191	hypothetical protein IAQ61_001947
Un	JACTNS010000005.1	1049865	1050205	-			IAQ61_001948	KAH9878675.1	79	hypothetical protein IAQ61_001948
Un	JACTNS010000005.1	1051010	1051809	-			IAQ61_001949	KAH9878676.1	240	hypothetical protein IAQ61_001949
Un	JACTNS010000005.1	1054274	1055522	-			IAQ61_001950	KAH9878677.1	321	hypothetical protein IAQ61_001950
Un	JACTNS010000005.1	1056951	1057269	+			IAQ61_001951	KAH9878678.1	88	hypothetical protein IAQ61_001951, partial
Un	JACTNS010000005.1	1057345	1057686	-			IAQ61_001952	KAH9878679.1	113	hypothetical protein IAQ61_001952
Un	JACTNS010000005.1	1057692	1059317	+			IAQ61_001953	KAH9878680.1	541	hypothetical protein IAQ61_001953
Un	JACTNS010000005.1	1059863	1060975	-			IAQ61_001954	KAH9878681.1	314	hypothetical protein IAQ61_001954
Un	JACTNS010000005.1	1061750	1062971	-		AMT16	IAQ61_001955	KAH9878682.1	375	Phospho-2-dehydro-3-deoxyheptonate aldolase amt16
Un	JACTNS010000005.1	1063598	1064466	+			IAQ61_001956	KAH9878683.1	267	hypothetical protein IAQ61_001956
Un	JACTNS010000005.1	1064865	1066361	-			IAQ61_001957	KAH9878684.1	498	hypothetical protein IAQ61_001957
Un	JACTNS010000005.1	1067504	1068140	-		LSM6	IAQ61_001958	KAH9878685.1	137	U4/U6-U5 snRNP complex subunit lsm6
Un	JACTNS010000005.1	1068221	1069661	+			IAQ61_001959	KAH9878686.1	438	hypothetical protein IAQ61_001959
Un	JACTNS010000005.1	1069875	1070867	-			IAQ61_001960	KAH9878687.1	330	hypothetical protein IAQ61_001960
Un	JACTNS010000005.1	1071200	1073785	-			IAQ61_001961	KAH9878688.1	725	hypothetical protein IAQ61_001961, partial
Un	JACTNS010000005.1	1074224	1077607	-			IAQ61_001962	KAH9878689.1	1127	hypothetical protein IAQ61_001962
Un	JACTNS010000005.1	1078517	1080278	-			IAQ61_001963	KAH9878690.1	511	hypothetical protein IAQ61_001963
Un	JACTNS010000005.1	1081624	1082758	+			IAQ61_001964	KAH9878691.1	357	hypothetical protein IAQ61_001964
Un	JACTNS010000005.1	1083086	1084546	-			IAQ61_001965	KAH9878692.1	486	hypothetical protein IAQ61_001965
Un	JACTNS010000005.1	1085257	1086811	-			IAQ61_001966	KAH9878693.1	482	hypothetical protein IAQ61_001966
Un	JACTNS010000005.1	1087489	1088701	+			IAQ61_001967	KAH9878694.1	171	hypothetical protein IAQ61_001967
Un	JACTNS010000005.1	1088748	1092091	+			IAQ61_001968	KAH9878695.1	779	hypothetical protein IAQ61_001968
Un	JACTNS010000005.1	1092786	1097363	-			IAQ61_001969	KAH9878696.1	1441	hypothetical protein IAQ61_001969
Un	JACTNS010000005.1	1099348	1101050	-			IAQ61_001970	KAH9878697.1	468	hypothetical protein IAQ61_001970
Un	JACTNS010000005.1	1102181	1102603	+			IAQ61_001971	KAH9878698.1	98	hypothetical protein IAQ61_001971
Un	JACTNS010000005.1	1117370	1118366	+			IAQ61_001972	KAH9878699.1	121	hypothetical protein IAQ61_001972, partial
Un	JACTNS010000005.1	1119207	1122948	-			IAQ61_001973	KAH9878700.1	1178	hypothetical protein IAQ61_001973
Un	JACTNS010000005.1	1124134	1125048	-			IAQ61_001974	KAH9878701.1	287	hypothetical protein IAQ61_001974
Un	JACTNS010000005.1	1125555	1125818	-			IAQ61_001975	KAH9878702.1	87	hypothetical protein IAQ61_001975
Un	JACTNS010000005.1	1128474	1130100	+			IAQ61_001976	KAH9878703.1	503	hypothetical protein IAQ61_001976
Un	JACTNS010000005.1	1131560	1133157	-			IAQ61_001977	KAH9878704.1	377	hypothetical protein IAQ61_001977, partial
Un	JACTNS010000005.1	1135770	1138485	-			IAQ61_001979	KAH9878705.1	810	hypothetical protein IAQ61_001979
Un	JACTNS010000005.1	1138561	1139010	-			IAQ61_001980	KAH9878706.1	149	hypothetical protein IAQ61_001980
Un	JACTNS010000005.1	1139326	1139904	-			IAQ61_001981	KAH9878707.1	192	hypothetical protein IAQ61_001981
Un	JACTNS010000005.1	1140031	1140336	+			IAQ61_001982	KAH9878708.1	101	hypothetical protein IAQ61_001982
Un	JACTNS010000005.1	1140920	1142476	-			IAQ61_001983	KAH9878709.1	518	hypothetical protein IAQ61_001983
Un	JACTNS010000005.1	1143145	1144446	-			IAQ61_001984	KAH9878710.1	301	hypothetical protein IAQ61_001984
Un	JACTNS010000005.1	1145132	1149650	+			IAQ61_001985	KAH9878711.1	725	hypothetical protein IAQ61_001985
Un	JACTNS010000005.1	1150562	1153065	+			IAQ61_001986	KAH9878712.1	738	hypothetical protein IAQ61_001986
Un	JACTNS010000005.1	1154792	1156394	-			IAQ61_001987	KAH9878713.1	499	hypothetical protein IAQ61_001987
Un	JACTNS010000005.1	1156847	1157143	-			IAQ61_001988	KAH9878714.1	98	hypothetical protein IAQ61_001988
Un	JACTNS010000005.1	1157624	1158805	+			IAQ61_001989	KAH9878715.1	393	hypothetical protein IAQ61_001989
Un	JACTNS010000005.1	1159568	1161191	-			IAQ61_001990	KAH9878716.1	455	hypothetical protein IAQ61_001990
Un	JACTNS010000005.1	1162781	1164157	+			IAQ61_001991	KAH9878717.1	426	hypothetical protein IAQ61_001991
Un	JACTNS010000005.1	1164751	1165361	+			IAQ61_001992	KAH9878718.1	165	hypothetical protein IAQ61_001992
Un	JACTNS010000005.1	1166349	1168896	+			IAQ61_001993	KAH9878719.1	809	hypothetical protein IAQ61_001993
Un	JACTNS010000005.1	1169044	1169787	-			IAQ61_001994	KAH9878720.1	247	hypothetical protein IAQ61_001994
Un	JACTNS010000005.1	1170550	1171776	+			IAQ61_001995	KAH9878721.1	408	hypothetical protein IAQ61_001995
Un	JACTNS010000005.1	1172002	1173017	-			IAQ61_001996	KAH9878722.1	321	hypothetical protein IAQ61_001996
Un	JACTNS010000005.1	1173288	1174970	-			IAQ61_001997	KAH9878723.1	560	hypothetical protein IAQ61_001997
Un	JACTNS010000005.1	1175947	1177182	+			IAQ61_001998	KAH9878724.1	364	hypothetical protein IAQ61_001998
Un	JACTNS010000005.1	1178447	1181664	+			IAQ61_001999	KAH9878725.1	679	hypothetical protein IAQ61_001999
Un	JACTNS010000005.1	1181970	1182989	-		PUP2	IAQ61_002000	KAH9878726.1	245	proteasome component pup2
Un	JACTNS010000005.1	1184796	1187289	+			IAQ61_002001	KAH9878727.1	688	hypothetical protein IAQ61_002001
Un	JACTNS010000005.1	1189190	1190504	+			IAQ61_002002	KAH9878728.1	324	hypothetical protein IAQ61_002002
Un	JACTNS010000005.1	1192451	1192792	+			IAQ61_002003	KAH9878729.1	113	hypothetical protein IAQ61_002003
Un	JACTNS010000005.1	1193908	1194795	-			IAQ61_002004	KAH9878730.1	295	hypothetical protein IAQ61_002004
Un	JACTNS010000005.1	1195487	1197100	-			IAQ61_002005	KAH9878731.1	418	hypothetical protein IAQ61_002005
Un	JACTNS010000005.1	1197904	1199070	-			IAQ61_002006	KAH9878732.1	388	hypothetical protein IAQ61_002006
Un	JACTNS010000005.1	1202220	1202636	-			IAQ61_002007	KAH9878733.1	138	hypothetical protein IAQ61_002007
Un	JACTNS010000005.1	1203324	1204169	+			IAQ61_002008	KAH9878734.1	281	hypothetical protein IAQ61_002008
Un	JACTNS010000005.1	1204855	1206117	-		RPN8	IAQ61_002009	KAH9878735.1	361	proteasome regulatory particle subunit
Un	JACTNS010000005.1	1206590	1207998	-			IAQ61_002010	KAH9878736.1	417	hypothetical protein IAQ61_002010
Un	JACTNS010000005.1	1208607	1209302	+			IAQ61_002011	KAH9878737.1	231	hypothetical protein IAQ61_002011
Un	JACTNS010000005.1	1209658	1209999	-			IAQ61_002012	KAH9878738.1	113	hypothetical protein IAQ61_002012
Un	JACTNS010000005.1	1210299	1211707	-			IAQ61_002013	KAH9878739.1	449	hypothetical protein IAQ61_002013
Un	JACTNS010000005.1	1213131	1215808	+			IAQ61_002014	KAH9878740.1	865	hypothetical protein IAQ61_002014
Un	JACTNS010000005.1	1217660	1218694	+			IAQ61_002015	KAH9878741.1	238	hypothetical protein IAQ61_002015, partial
Un	JACTNS010000005.1	1219796	1221661	-			IAQ61_002016	KAH9878742.1	499	hypothetical protein IAQ61_002016, partial
Un	JACTNS010000005.1	1223273	1223673	+			IAQ61_002017	KAH9878743.1	113	hypothetical protein IAQ61_002017
Un	JACTNS010000005.1	1243009	1243380	+			IAQ61_002018	KAH9878744.1	123	hypothetical protein IAQ61_002018
Un	JACTNS010000005.1	1244039	1245364	-			IAQ61_002019	KAH9878745.1	388	hypothetical protein IAQ61_002019
Un	JACTNS010000005.1	1245999	1247300	+			IAQ61_002020	KAH9878746.1	433	hypothetical protein IAQ61_002020
Un	JACTNS010000005.1	1247896	1248528	+			IAQ61_002021	KAH9878747.1	210	hypothetical protein IAQ61_002021
Un	JACTNS010000005.1	1249200	1251898	+			IAQ61_002022	KAH9878748.1	810	hypothetical protein IAQ61_002022
Un	JACTNS010000005.1	1252880	1254151	+			IAQ61_002023	KAH9878749.1	376	hypothetical protein IAQ61_002023
Un	JACTNS010000005.1	1256243	1259999	+			IAQ61_002024	KAH9878750.1	1018	hypothetical protein IAQ61_002024
Un	JACTNS010000005.1	1261498	1261767	-			IAQ61_002025	KAH9878751.1	89	hypothetical protein IAQ61_002025
Un	JACTNS010000005.1	1262524	1265476	+			IAQ61_002026	KAH9878752.1	771	hypothetical protein IAQ61_002026
Un	JACTNS010000005.1	1266662	1268121	-			IAQ61_002027	KAH9878753.1	451	hypothetical protein IAQ61_002027
Un	JACTNS010000005.1	1269044	1271271	+			IAQ61_002028	KAH9878754.1	694	hypothetical protein IAQ61_002028
Un	JACTNS010000005.1	1273333	1276070	-			IAQ61_002029	KAH9878755.1	868	hypothetical protein IAQ61_002029, partial
Un	JACTNS010000005.1	1276807	1277253	+			IAQ61_002030	KAH9878756.1	67	hypothetical protein IAQ61_002030
Un	JACTNS010000005.1	1277621	1278858	-			IAQ61_002031	KAH9878757.1	379	hypothetical protein IAQ61_002031
Un	JACTNS010000005.1	1279311	1279939	+			IAQ61_002032	KAH9878758.1	154	hypothetical protein IAQ61_002032
Un	JACTNS010000005.1	1281761	1282924	-			IAQ61_002033	KAH9878759.1	360	hypothetical protein IAQ61_002033
Un	JACTNS010000005.1	1285061	1287518	-			IAQ61_002034	KAH9878760.1	592	hypothetical protein IAQ61_002034, partial
Un	JACTNS010000005.1	1288377	1289658	+			IAQ61_002035	KAH9878761.1	246	hypothetical protein IAQ61_002035, partial
Un	JACTNS010000005.1	1290118	1291869	+			IAQ61_002036	KAH9878762.1	583	hypothetical protein IAQ61_002036
Un	JACTNS010000005.1	1294318	1296266	-			IAQ61_002037	KAH9878763.1	602	hypothetical protein IAQ61_002037
Un	JACTNS010000005.1	1297322	1299669	+			IAQ61_002038	KAH9878764.1	697	hypothetical protein IAQ61_002038
Un	JACTNS010000005.1	1300205	1302646	+		ATP2	IAQ61_002039	KAH9878765.1	563	atp2, beta subunit of the F1 sector of mitochondrial F1F0 ATP synthase
[truncated: 9,838 more rows]
