# Supplementary material for: Secretome Analysis for a New Strain of the Blackleg Fungus Plenodomus lingam Reveals Candidate Proteins for Effectors and Virulence Factors
Source: J Fungi (Basel). 2023 Jul 11;9(7):740. doi: 10.3390/jof9070740 (PMC10381368; doi:10.3390/jof9070740)
Supplement: Supplementary file 1 [file jof-09-00740-s001.zip › Table S2.xlsx]

## Sheet: Sheet1
Protein ID	No. of aa	MW	PI	R-	R+	Formula	EC	II	AI	GRAVY
KAH9872236.1	409	42720.6	5.25	35	28	C1913H2951N489O612S4	47915	32.42 (stable)	78.44	-0.048
KAH9872288.1	312	32683.1	4.3	40	20	C1421H2193N371O485S14	21025	35.68 (stable)	65.96	-0.208
KAH9872347.1	848	9030.31	9.49	71	94	C4072H6418N1202O1259S21	78895	53.07 (unstable)	68.79	-0.552
KAH9872391.1	245	26070.1	8.82	12	15	C1161H1767N309O360S8	64525	29.78 (stable)	70.08	-0.1
KAH9872433.1	1316	148402	5.43	181	141	C6653H10198N1804O1971S44	265185	36.12 (stable)	80.28	-0.395
KAH9872512.1	552	58804.2	5.5	50	43	C2603H4066N714O806S17	84840	31.50 (stable)	82.12	-0.144
KAH9870266.1	357	38906.8	5.64	33	22	C1717H2625N471O523S21	51185	32.36 (stable)	81.43	-0.045
KAH9870272.1	445	49665.7	6.26	46	37	C2198H3366N626O662S16	82890	38.76 (stable)	74.56	-0.338
KAH9870311.1	587	64760.3	5.68	53	38	C2884H4332N798O867S22	127810	26.94 (stable)	70.89	-0.357
KAH9870561.1	1007	110153	5.53	100	84	C5003H7571N1293O1488S16	205025	24.27 (stable)	79.26	-0.257
KAH9870573.1	592	64362.2	5.77	57	46	C2896H4378N780O860S15	120250	23.87 (stable)	77.64	-0.217
KAH9871448.1	361	39093.5	6.28	49	47	C1767H2767N461O527S6	38640	28.76 (stable)	83.32	-0.254
KAH9871526.1	456	51614.9	8.76	44	49	C2324H3507N631O684S12	111730	32.59 (stable)	69.36	-0.518
KAH9869251.1	209	22595.3	5.67	20	18	C989H1554N274O316S8	50210	37.58 (stable)	72.92	-0.318
KAH9869357.1	354	38080.1	5.12	31	24	C1694H2659N459O519S10	33140	33.10 (stable)	89.1	-0.123
KAH9870773.1	373	41662.4	4.58	45	27	C1840H2780N494O579S18	87110	35.10 (stable)	66.94	-0.451
KAH9870804.1	646	67744.2	6.19	59	52	C2910H4491N815O965S44	75105	34.86 (stable)	51.78	-0.429
KAH9869412.1	387	43180.8	4.48	78	43	C1872H2959N513O636S11	26930	50.28 (unstable)	78.17	-0.615
KAH9869448.1	605	65033.1	5.2	53	36	C2924H4444N782O873S16	97665	37.22 (stable)	80.02	-0.108
KAH9869460.1	562	62082.4	5.26	54	42	C2805H4199N731O842S14	101105	36.70 (stable)	69.59	-0.314
KAH9869495.1	565	63062.5	7.61	60	61	C2848H4288N768O845S8	165365	23.33 (stable)	72.41	-0.432
KAH9869498.1	532	57086.9	6.13	69	59	C2509H3921N695O797S16	65445	34.72 (stable)	72.35	-0.398
KAH9869584.1	738	80950.1	5.35	86	65	C3594H5488N1006O1103S16	80790	32.95 (stable)	71.41	-0.34
KAH9869606.1	86	9042.34	5.07	9	5	C377H604N112O122S12	6000	52.54 (unstable)	78.37	0.181
KAH9869644.1	389	43067.3	6.59	30	27	C1944H2889N527O563S13	102370	37.46 (stable)	65.96	-0.381
KAH9869792.1	339	30344.5	4.28	29	10	C1295H2101N385O447S4	9970	13.91 (stable)	95.1	0.417
KAH9866875.1	508	55356.4	5.32	63	45	C2449H3770N684O739S23	95380	32.34 (stable)	80.96	-0.206
KAH9866905.1	415	45140.2	5.03	45	25	C1989H2958N540O615S27	79505	36.49 (stable)	58.1	-0.366
KAH9866983.1	561	60361.3	4.82	51	40	C2736H4187N699O817S13	66030	32.38 (stable)	84.88	-0.007
KAH9867814.1	356	38042.4	6.82	41	40	C1672H2653N471O507S18	48525	26.63 (stable)	80.53	-0.295
KAH9867862.1	313	35442.8	5.93	42	37	C1586H2377N435O466S14	89630	36.54 (stable)	61.41	-0.631
KAH9868016.1	576	62530.6	5.13	60	40	C2800H4280N750O836S22	71195	46.92 (unstable)	80.33	-0.097
KAH9868035.1	573	64366.3	6	68	57	C2878H4406N796O860S14	103040	50.13 (unstable)	76.47	-0.429
KAH9868053.1	222	24730.1	5.27	31	25	C1116H1726N288O335S6	39545	27.53 (stable)	79.05	-0.356
KAH9868081.1	375	40655.1	8.93	24	33	C1818H2791N487O542S16	69955	35.45 (stable)	72.4	-0.141
KAH9868103.1	1853	192570	5.41	52	48	C8653H13704N2146O2762S18	195560	26.28 (stable)	92.43	0.294
KAH9867052.1	264	27277.7	4.9	25	18	C1191H1885N337O377S10	25815	34.33 (stable)	84.28	-0.017
KAH9867137.1	389	42597.2	5.56	39	30	C1910H2899N499O571S19	54945	42.65 (unstable)	72.57	-0.162
KAH9867153.1	533	56702.2	4.85	54	40	C2533H3962N660O783S16	69580	32.71 (stable)	87.77	-0.01
KAH9867196.1	770	82935.4	6.06	64	59	C3710H5694N958O1145S28	101940	38.44 (stable)	72.87	-0.139
KAH9867229.1	212	23997.5	5.07	29	15	C1071H1553N297O318S10	67295	44.65 (unstable)	58.54	-0.522
KAH9867231.1	536	59444.3	6.64	48	46	C2676H4103N739O773S14	110030	30.03 (stable)	85.56	-0.248
KAH9867270.1	245	25582.8	8.37	16	18	C1121H1782N320O353S6	10680	42.56 (unstable)	82.94	-0.061
KAH9867299.1	408	44517.3	5.63	47	36	C1974H3117N545O609S9	60975	36.98 (stable)	92.77	-0.21
KAH9867337.1	147	16658.3	9.07	16	22	C741H1173N209O210S9	22835	41.04 (unstable)	78.84	-0.479
KAH9867420.1	399	42479.8	5.35	36	31	C1890H2888N504O579S17	65695	30.58 (stable)	71.4	-0.15
KAH9867466.1	476	49853.4	4.43	42	24	C2188H3410N598O713S11	45060	36.73 (stable)	85.88	-0.016
KAH9867489.1	322	33514.8	5.21	29	21	C1469H2323N413O462S11	41980	35.87 (stable)	84.69	0.031
KAH9864751.1	135	14170.9	4.86	12	9	C621H973N175O197S4	17085	36.34 (stable)	86.81	0.036
KAH9865909.1	563	62554.1	5.12	100	79	C2714H4304N770O879S24	59330	43.06 (unstable)	70.57	-0.674
KAH9866339.1	312	29981.8	6.89	16	16	C1292H2076N368O423S14	11835	43.38 (unstable)	75.45	0.076
KAH9866356.1	434	46974.3	5.35	40	31	C2099H3158N568O640S12	102790	29.14 (stable)	72.07	-0.292
KAH9867525.1	656	68429.5	8.25	38	43	C3014H4623N811O955S29	85940	31.33 (stable)	67.42	-0.103
KAH9867527.1	761	82744.9	5.23	75	61	C3708H5660N976O1135S21	113025	44.22 (unstable)	73.57	-0.264
KAH9867557.1	369	40559.8	9.53	40	47	C1779H2834N546O531S6	54555	48.77 (unstable)	79.78	-0.499
KAH9867743.1	900	96609	5.06	91	64	C4297H6684N1162O1318S28	113595	26.28 (stable)	83.58	-0.082
KAH9864831.1	453	50802.5	5.54	63	46	C2310H3559N603O683S3	44810	28.22 (stable)	91.43	-0.306
KAH9865021.1	205	21099.6	7.7	14	16	C883H1352N260O291S26	23960	28.49 (stable)	37.71	-0.375
KAH9865134.1	382	41987.6	6.82	33	32	C1878H2868N508O553S18	76945	34.76 (stable)	76.41	-0.212
KAH9865234.1	249	26080	9.3	20	27	C1142H1870N330O348S9	14690	29.80 (stable)	91.41	0.001
KAH9865263.1	230	24104.6	9.04	17	26	C1058H1699N295O323S12	15525	31.14 (stable)	78.65	-0.122
KAH9863037.1	349	38676.3	5.91	33	28	C1727H2611N463O525S13	52870	43.89 (unstable)	64.96	-0.348
KAH9863154.1	2260	248643	8.44	255	267	C10968H17584N3124O3338S63	240680	46.92 (unstable)	89.39	-0.289
KAH9863161.1	240	26418.7	5.62	27	21	C1185H1815N327O351S5	43430	39.18 (stable)	85.46	-0.198
KAH9863230.1	869	93283.6	5.19	82	62	C4165H6389N1123O1274S22	139495	32.36 (stable)	80.37	-0.186
KAH9863266.1	296	31753.1	9.07	22	26	C1403H2235N397O425S9	11585	46.23 (unstable)	84.36	-0.054
KAH9863282.1	825	86970.4	7.35	67	68	C3809H5912N1046O1180S54	94710	35.39 (stable)	62.68	-0.31
KAH9863374.1	351	37463.4	6.1	34	31	C1636H2587N463O509S18	33460	65.27 (unstable)	62.34	-0.541
KAH9863410.1	337	36010.7	4.96	23	15	C1594H2369N435O498S13	85870	30.42 (stable)	63.98	-0.269
KAH9863430.1	705	77630	8.86	64	71	C3470H5398N964O1027S18	110155	40.02 (unstable)	80.85	-0.214
KAH9865289.1	372	37888.7	4.86	27	16	C1681H2598N438O527S16	45880	32.88 (stable)	74.3	0.03
KAH9861880.1	516	57161.7	6.72	72	70	C2530H3983N711O770S15	38195	43.56 (unstable)	75.79	-0.537
KAH9861890.1	683	72225.4	4.86	66	46	C3180H4995N849O1008S28Se1	53705	39.14 (stable)	76.08	-0.074
KAH9861931.1	529	57467.3	4.57	95	55	C2574H3977N643O826S10	43695	32.21 (stable)	77.22	-0.32
KAH9861983.1	576	64457.7	5.53	65	44	C2902H4415N771O863S17	75875	41.48 (unstable)	82.1	-0.18
KAH9862013.1	552	59442.6	4.78	49	32	C2693H4064N702O807S8	83450	42.77 (unstable)	82.01	-0.105
KAH9862482.1	440	50634	9.4	49	66	C2246H3500N650O637S26	73965	35.94 (stable)	69	-0.565
KAH9862484.1	388	42342.1	5.79	40	37	C1908H2958N516O560S8	54320	25.90 (stable)	88.61	-0.1
KAH9863475.1	824	91873.7	8.7	63	74	C4108H6412N1138O1170S44	96035	54.68 (unstable)	86.12	-0.133
KAH9863548.1	595	66332.5	5.44	65	42	C2996H4470N794O878S21	121045	37.20 (stable)	75.21	-0.285
KAH9860925.1	635	69221.7	5.04	76	53	C3066H4667N845O963S14	103960	30.41 (stable)	71.81	-0.397
KAH9860933.1	743	81618.3	8.72	75	81	C3636H5775N1029O1067S20	81860	46.91 (unstable)	89	-0.231
KAH9860991.1	465	50364.5	6.5	43	41	C2217H3460N606O701S17	53455	38.68 (stable)	76.49	-0.309
KAH9861149.1	393	43791.8	6.83	38	37	C1919H2933N573O578S16	66390	36.24 (stable)	72.19	-0.365
KAH9861194.1	394	41636.1	6.87	36	35	C1841H2903N511O566S12	42650	26.65 (stable)	80.48	-0.109
KAH9861198.1	720	78800.3	5.56	72	52	C3478H5308N958O1069S36	123980	46.98 (unstable)	70.29	-0.341
KAH9861228.1	542	55373.8	4.76	53	32	C2443H3804N640O795S16	55975	54.59 (unstable)	68.58	-0.177
KAH9861233.1	369	39647.7	5.87	33	25	C1749H2717N491O534S15	48525	52.26 (unstable)	88.62	0.007
KAH9861251.1	929	102506	5.55	109	88	C4601H6988N1256O1393S10	216830	29.83 (stable)	78.03	-0.373
KAH9861329.1	252	26917.6	8.96	13	18	C1192H1873N325O363S11	38640	21.64 (stable)	79.05	-0.188
KAH9862071.1	748	82348.4	5.73	78	60	C3678H5592N992O1113S26	116005	39.14 (stable)	70.17	-0.414
KAH9862124.1	930	104922	5.95	116	99	C4643H7289N1317O1400S30	128270	47.37 (unstable)	83.19	-0.425
KAH9862149.1	325	33220.7	9.05	20	28	C1471H2321N403O451S11	43235	39.99 (stable)	75.48	-0.157
KAH9862207.1	382	41648.4	4.88	39	24	C1862H2802N492O574S12	81400	23.12 (stable)	65.13	-0.336
KAH9862350.1	348	37916.9	6.71	38	37	C1673H2654N476O512S9	42315	34.81 (stable)	88.62	-0.269
KAH9862359.1	518	56364.4	5.62	47	41	C2483H3823N691O761S26	107300	37.51 (stable)	76.35	-0.165
KAH9859347.1	798	85505.9	6.5	67	63	C3809H5866N1050O1160S18	163095	30.17 (stable)	76.73	-0.277
KAH9859385.1	509	57154.9	8.03	55	57	C2590H4051N701O725S17	67310	43.68 (unstable)	95.97	-0.104
KAH9859392.1	732	77946.5	5.23	83	61	C3433H5349N927O1090S28	65875	29.76 (stable)	79.04	-0.152
KAH9859548.1	653	71720.6	9.08	52	61	C3229H5001N879O938S18	106020	34.40 (stable)	84.73	-0.154
KAH9859625.1	469	52621.7	5.02	60	43	C2321H3505N637O718S25	95060	39.56 (stable)	63.01	-0.552
KAH9859631.1	895	100637	5.26	104	78	C4513H6788N1202O1354S34	187060	30.04 (stable)	69.43	-0.427
KAH9859681.1	659	71444.6	6.09	56	51	C3211H4916N858O960S17	115780	30.06 (stable)	79.38	-0.114
KAH9859685.1	541	60149	5.63	55	45	C2718H4131N709O804S17	103165	39.25 (stable)	78.24	-0.248
KAH9859686.1	607	66381.4	5.46	68	56	C2955H4569N805O912S13	83115	38.75 (stable)	78.55	-0.312
KAH9859690.1	365	37599.1	8.58	25	30	C1618H2591N465O533S16	32595	21.30 (stable)	75.86	-0.141
KAH9859726.1	876	94413.7	4.62	98	57	C4204H6359N1129O1316S20	165630	29.92 (stable)	76.19	-0.253
KAH9859773.1	707	78427.9	5.43	91	63	C3529H5372N962O1050S11	119750	35.78 (stable)	81.43	-0.332
KAH9859843.1	587	63483.7	6.84	46	46	C2819H4323N785O870S11	115780	40.77 (unstable)	75.86	-0.189
KAH9859860.1	175	19145.5	6.18	18	16	C846H1300N236O259S7	32555	32.39 (stable)	70.97	-0.222
KAH9859863.1	534	58618.9	5.07	70	50	C2570H4059N717O815S18	48735	35.67 (stable)	84.59	-0.297
KAH9859918.1	167	17405.9	6.28	18	18	C763H1230N212O238S7	13200	37.92 (stable)	88.56	0.107
KAH9860056.1	651	69000.6	6.87	47	46	C3072H4733N841O932S20	118050	29.23 (stable)	76.18	-0.084
KAH9860121.1	626	67052.3	8.45	55	58	C3006H4744N816O901S10	63385	30.45 (stable)	90.86	-0.075
KAH9860127.1	416	47431.1	5.22	51	35	C2154H3186N556O636S12	110700	32.04 (stable)	73.65	-0.39
KAH9860138.1	380	39798.7	9.3	20	30	C1736H2766N474O567S14	39920	41.81 (unstable)	68.42	-0.119
KAH9860170.1	1043	112217	5.1	141	106	C4800H7606N1412O1643S26	80955	57.66 (unstable)	60.99	-0.708
KAH9860177.1	504	53752.7	8.62	44	47	C2420H3841N651O709S11	48025	37.15 (stable)	92.38	0.031
KAH9860190.1	407	45968.1	5.25	63	47	C2057H3156N554O611S17	77015	40.24 (unstable)	72.92	-0.437
KAH9881285.1	501	53852.1	8.2	46	48	C2417H3741N661O709S14	70150	35.14 (stable)	80.74	-0.096
KAH9881315.1	429	45571.5	6.6	35	34	C2052H3152N552O608S9	40590	29.86 (stable)	81.7	-0.05
KAH9881377.1	834	90928.2	7.3	69	69	C4072H6189N1113O1205S26Se1	162900	34.14 (stable)	70.35	-0.261
KAH9881423.1	91	9616.93	5.66	8	7	C410H650N110O136S10	4970	41.89 (unstable)	62.31	-0.189
KAH9881459.1	479	51396.5	8.49	41	44	C2312H3606N622O681S12	87110	33.02 (stable)	86.99	-0.024
KAH9881502.1	388	42143.6	6.91	40	40	C1889H2920N514O564S9	70610	19.17 (stable)	77.35	-0.291
KAH9881503.1	88	9046.35	6.2	3	2	C380H612N108O125S11	3355	49.27 (unstable)	78.75	0.231
KAH9881531.1	1116	125223	5.99	152	138	C5577H8877N1521O1661S44	101480	47.83(unstable)	88.79	-0.28
KAH9881533.1	339	37524.9	6.64	34	34	C1668H2561N467O511S6	63620	38.74 (stable)	74.84	-0.351
KAH9881728.1	1036	113771	5.19	117	83	C5053H7772N1374O1550S35Se1	157860	36.72 (stable)	76.98	-0.246
KAH9878325.1	492	54771.1	5.43	55	44	C2441H3775N651O739S22	70540	36.46 (stable)	82.85	-0.197
KAH9878400.1	1211	135984	5.43	172	134	C6009H9369N1687O1853S34	152945	50.65 (unstable)	76.62	-0.6
KAH9878465.1	1220	134191	8.61	139	170	C5694H9109N1795O1749S109	86775	57.96 (unstable)	56.27	-0.72
KAH9878748.1	810	92511.6	5	124	82	C4174H6284N1102O1248S20	174890	42.68 (unstable)	73.33	-0.551
KAH9879446.1	544	58905.1	4.89	63	46	C2601H4029N713O811S20	128715	36.05 (stable)	83.62	-0.128
KAH9879448.1	265	26452.7	5.28	16	13	C1144H1845N319O381S9	18825	37.01 (stable)	88.34	0.217
KAH9879481.1	404	42330.1	6.45	32	30	C1846H2905N539O591S7	5888	25.80 (stable)	79.83	-0.101
KAH9879558.1	534	59126.5	4.34	66	28	C2658H3947N671O832S16	85525	37.77 (stable)	72.9	-0.276
KAH9879606.1	839	93021.7	4.89	107	65	C4108H6373N1135O1292S19Se1	78075	36.67 (stable)	82.8	-0.293
KAH9879672.1	546	60736.3	5.56	61	42	C2704H4203N759O812S10Se1	84005	33.97 (stable)	90.27	-0.179
KAH9879713.1	399	44979.8	5.88	47	33	C2034H3063N543O590S13	87570	40.02 (unstable)	78.72	-0.363
KAH9879728.1	500	54687.4	4.88	65	38	C2395H3714N658O756S27	70165	37.12 (stable)	80.26	-0.227
KAH9880792.1	307	33302.1	7.06	25	25	C1493H2348N396O446S10	49640	34.71 (stable)	94.69	0.083
KAH9880843.1	452	47649.3	5.02	41	29	C2102H3264N558O674S16	72475	30.02 (stable)	78.16	-0.074
KAH9880858.1	548	59903.6	5.58	61	53	C2667H4120N728O807S19	91830	41.48 (unstable)	75.8	-0.259
KAH9880906.1	539	58409.2	4.89	57	31	C2607H3912N682O806S22	91510	37.79 (stable)	71.69	-0.196
KAH9880945.1	661	71983.1	5.67	64	52	C3180H4896N856O970S37Se2	103580	55.34 (unstable)	62.65	-0.332
KAH9876775.1	499	56714.3	9.2	51	61	C2572H3991N711O706S17	122060	37.56 (stable)	92.08	-0.139
KAH9876919.1	671	75649	4.65	84	51	C3383H5115N905O1048S13	146025	44.18 (unstable)	77.53	-0.408
KAH9876928.1	339	36927.3	8.36	36	39	C1634H2542N456O508S7	50225	29.91 (stable)	73.45	-0.477
KAH9876931.1	402	42160.9	5.36	37	32	C1859H2890N518O592S6	48360	20.52 (stable)	80.8	-0.17
KAH9876942.1	501	54548.4	9.63	30	42	C2355H3660N732O736S17	27640	68.70 (unstable)	51.94	-0.861
KAH9876991.1	207	22240.7	5.5	28	25	C990H1605N259O301S9	11710	22.16 (stable)	90.92	-0.187
KAH9877048.1	461	50215.8	4.66	46	24	C2275H3404N592O690S4	137280	26.47 (stable)	86.2	-0.871
KAH9877051.1	266	27703.5	5.85	20	19	C1232H1956N318O389S8	22920	30.39 (stable)	75.34	-0.068
KAH9877180.1	414	44292.7	4.46	56	25	C1981H3069N507O628S8	42860	45.39 (unstable)	90.36	-0.013
KAH9877259.1	643	69163.5	5.51	70	56	C3084H4750N840O947S13	74510	27.84 (stable)	77.42	-0.216
KAH9877340.1	415	44871.7	7.14	34	34	C1989H3079N551O601S17	66265	44.07 (unstable)	72.96	-0.314
KAH9877374.1	566	61993.5	5.09	52	38	C2788H4192N750O827S17	104085	37.14 (stable)	78.66	-0.164
KAH9877485.1	384	39019.5	5.35	34	27	C1686H2692N470O566S13	40950	19.98 (stable)	79.97	-0.046
KAH9877486.1	628	69102.8	5.63	61	52	C3109H4715N835O921S18	115085	36.61 (stable)	73.14	-0.288
KAH9877596.1	522	54606.7	6.68	44	42	C2342H3610N672O765S37	62030	33.69 (stable)	53.75	-0.432
KAH9877618.1	616	66893.4	6.02	63	52	C2917H4469N807O937S33	106685	49.54 (unstable)	55.76	-0.424
KAH9878786.1	643	70250.3	5.15	68	47	C3122H4792N850O975S13	93865	53.00 (unstable)	78.58	-0.31
KAH9878789.1	649	73113.1	9.16	70	88	C3280H5147N891O945S29	112480	41.07 (unstable)	80.46	-0.3
KAH9878810.1	498	54168.3	5.68	45	38	C2429H3761N641O734S15	54695	43.49 (unstable)	86.39	-0.011
KAH9874320.1	161	17665.7	4.34	21	11	C774H1186N206O250S9	18700	28.58 (stable)	73.42	-0.287
KAH9874579.1	721	79252.1	4.68	74	35	C3573H5243N933O1104S10	199160	36.42 (stable)	69.43	-0.352
KAH9874600.1	227	24096.3	9	11	15	C1060H1586N294O343S5	60975	32.45 (stable)	50.7	-0.463
KAH9874610.1	420	46136	6.74	34	33	C2072H3112N546O614S20	95965	36.11 (stable)	63.95	-0.259
KAH9874626.1	330	35612.3	6.59	30	29	C1587H2448N424O479S15	45295	36.15 (stable)	72.88	-0.245
KAH9874675.1	378	40500.9	5.51	43	31	C1812H2837N495O543S8	49515	35.76 (stable)	94.68	0.013
KAH9874738.1	402	41475.1	9.26	27	33	C1856H2920N514O551S7	30035	26.07 (stable)	89.63	0.205
KAH9874774.1	939	100655	5.17	86	70	C4432H6835N1203O1366S57	168955	36.33 (stable)	71.2	-0.204
KAH9874780.1	781	87347.2	4.93	99	64	C3950H5910N1030O1198S11	183010	31.48 (stable)	77.27	-0.369
KAH9874806.1	495	53873.4	8.48	41	44	C2447H3772N654O700S10	61100	35.4 (stable)	86.08	-0.029
KAH9875588.1	248	27023.7	7.01	16	16	C1223H1863N325O353S8	50545	35.17 (stable)	81.77	-0.069
KAH9875725.1	384	42110.5	5.72	39	32	C1898H2889N513O556S10	80245	34.51 (stable)	82.06	-0.198
KAH9875744.1	187	19491.9	8.03	17	19	C850H1314N238O267S11	23420	25.72 (stable)	61.07	-0.288
KAH9875764.1	201	21146.6	4.76	14	11	C936H1437N253O295S6	35660	27.82 (stable)	78.16	0.009
KAH9875830.1	627	67753.8	5.9	64	56	C3011H4711N823O915S21	85510	40.47 (unstable)	85.26	-0.102
KAH9875831.1	610	68408	5.71	61	40	C3069H4584N852O901S18	142250	25.10 (stable)	76.11	-0.392
KAH9875835.1	437	46979.1	4.77	40	26	C2133H3262N550O634S7	69580	31.94 (stable)	91.24	-0.017
KAH9875873.1	771	84986	5.14	83	59	C3827H5701N1015O1141S25	161035	38.95 (stable)	68.09	-0.293
KAH9875887.1	323	35840.1	5.46	36	27	C1614H2452N442O479S4	69900	34.85 (stable)	80.4	-0.276
KAH9875892.1	334	36271	9.52	34	47	C1534H2502N492O485S21	12085	57.55 (unstable)	60.45	-0.681
KAH9875936.1	333	36142.8	7.6	30	31	C1600H2490N442O490S12	57660	31.38 (stable)	76.31	-0.265
KAH9875973.1	205	22674.5	5.53	18	11	C1019H1511N265O301S12	31315	48.74 (unstable)	64.83	-0.168
KAH9876010.1	600	66871.7	5.06	67	44	C3067H4483N781O889S11	141430	44.68 (unstable)	69.48	-0.283
KAH9872172.1	1528	158362	5.37	122	97	C6822H10685N1869O2321S73	211210	48.29 (unstable)	61.26	-0.279
KAH9872177.1	276	30938	5.74	33	23	C1383H2088N378O411S11	46660	35.74 (stable)	71.05	-0.407
KAH9872205.1	596	65679.6	5.75	58	40	C2940H4446N812O871S18	118175	33.38 (stable)	77.7	-0.302
KAH9873539.1	628	71023.6	5.15	95	68	C3140H4812N870O963S27	96800	40.49 (unstable)	70.49	-0.547
KAH9873589.1	231	25318.8	4.55	20	12	C1117H1722N286O347S19	41785	43.18 (unstable)	80.74	-0.002
KAH9873652.1	430	46473	6.68	51	49	C2051H3288N580O622S14	34295	25.29 (stable)	90.09	-0.182
KAH9873674.1	551	59555.3	6.1	53	49	C2624H4031N751O811S15	71890	48.45 (unstable)	60.25	-0.579
KAH9873703.1	504	54085.6	7.52	66	67	C2394H3852N638O752S15	45755	41.77 (unstable)	78.15	-0.403
KAH9873864.1	327	37019.2	5.45	28	20	C1666H2442N432O503S14	75915	31.88 (stable)	55.47	-0.51
KAH9873874.1	536	59160.9	5.11	90	64	C2582H4037N723O836S18	66850	41.59 (unstable)	65	-0.721
KAH9873955.1	468	48780.4	4.81	53	33	C2118H3346N594O696S16	39670	28.48 (stable)	82.39	-0.062
KAH9874050.1	107	10493.1	4.78	5	4	C442H731N121O148S12	2115	34.74 (stable)	87.76	0.68
KAH9874252.1	924	102455	8.5	129	133	C4507H7229N1327O1373S15	80455	43.07 (unstable)	82.26	-0.528
KAH9874273.1	419	45356.9	6	40	35	C2030H3098N548O614S11	96050	20.27 (stable)	77.88	-0.179
