# Supplementary material for: Secretome Analysis for a New Strain of the Blackleg Fungus Plenodomus lingam Reveals Candidate Proteins for Effectors and Virulence Factors
Source: J Fungi (Basel). 2023 Jul 11;9(7):740. doi: 10.3390/jof9070740 (PMC10381368; doi:10.3390/jof9070740)
Supplement: Supplementary file 1 [file jof-09-00740-s001.zip › Table S3.xlsx]

## Sheet: Sheet1
Protein ID						Effectors probabilities
>KAH9876414.1 hypothetical protein J1614_003545 [Plenodomus biglobosus] | Apoplastic effector probability: 0.692
MQIKDLVVALAVPAICIAAAIPTPQDPVEPEFPEGGQDEIVGGVAAAAGEFPYIVSLQRSGSHFCGGSLLNANTVVTAAHCAVGQSAASITIRAGSNSRTSGGTVVRASSIRISPSYTSSTYDSDVAIIKLATPIATSSTISFVTLPAAGSDPAAGSVATVAGWGTLSSGGQSLPVQLQKVDVPIVSRTTCRTNYGQSAITNNMICAGLTQGGKDSCQGDSGGPIVNTSRQLIGLVSWGEGCAAAGKPGVYTRVSAVLSFITSNM
>KAH9877785.1 hypothetical protein J1614_003002 [Plenodomus biglobosus] | Cytoplasmic effector probability: 0.723
MLFSRVIPAAIALLPALTAAAGVLDLEPNNFDDVVLKSGKPALVEFFAPWCGHCKNLAPVYEELAGAFQHASDKVSVAKVDADAHKSLGKRFGVTGFPTLKWFDGKSDKPTDYSGGRDLESLTNFITEKSGIKPKVKAKLPSAVTYLDNQSFKEKVGKEQDVLVAFTAPWCGHCKTLAPIWETLANDFVNEPSVLIAKVDAEAENSKALASEQGVQGYPTIKYFKKGSTEALPYEGGRTEADFINFLNTNSGTHRTVGGGLDATGGTIEAFNSVIEKFQGAYGDGAEEAKKIAADLQDKYAQYYVKVFDKIGANKDYAAKELKRLQGLLTKGTLAPEKVDDITSRSNILRKFLGMEEKTEL
>KAH9878097.1 hypothetical protein J1614_003314 [Plenodomus biglobosus] | Apoplastic effector probability: 0.651
MRVPSTLLALSSVASGLILPRQAPASNSSTPNVAAAQYDGKCFYPVPDSKFDLQAYLGTWYQVAGTPFGPTAGARCISANYSLNENGTVRVVNTATLGPQAIDIVGTATPVDSAYGMGGAFAVSFPGTPSTSECPGPNYIVQDYAVEWAIVQTQNWSTLYILSRERQPAPAIIDAWIDRAVMFGSEASAIQKFNQTGCDTN
>KAH9878982.1 hypothetical protein J1614_002417 [Plenodomus biglobosus] | Cytoplasmic effector probability: 0.637
MRNFWALPAVLRMALASQHAFSVFDDLLAFPQYEITWPDSFVSEKDATSLLSQRSSASSSATTAGTQATQELSKRAPSHADSPPTEDALDQTYEAVVLQGQRYLCSIPVIPDQEPQNSTTSAEDARAEEEKELVRAADRGWQLLEGMRGNCIYYISGWWSYSFCYTDKVKQFHQLPPSRGVPIYPPVEDTSVHSYVLGRYPKGDKGSKAGAAKTLGSEQGSKEAFDDEGNQQEDKGLEVPRLETKGGSRYMVQRLSGGTECDLTGKPRKIDVQFHCNPQSADRISMIKETSTCSYLMIIDTPRLCRDAAFQPPQKNLAHPVTCHAVIPDSQFDSWTAARIESEAVAQAEHPVAEPDTANSNPLRDVTEGLEGSTKRGPIIGGIEVGAKSLVGSEGKIIE…
>KAH9878989.1 hypothetical protein J1614_002424 [Plenodomus biglobosus] | Apoplastic effector probability: 0.505
MRGLVTRTSAACLLASAAQAQLYPNQSALNHTCQLQKPLLSCPEQDASKVDSCCVETFGGLVLSTQFWSTYTGLESQGQVLPTDTWTIHGLWPDFCNGSYTQYCDLTRQYDPIPSPNTTTGLPNGTHVAPYTGPNIGTFLEPFGRHDLLTYMNTYWIAQDQANPVLWAHEYSKHATCFSTFNTPCYGPLYRKHEDVVDYFETTILYYRRFPTFDWLAASGITPSNSTTYSYAKMRDVLFAQHGGVPFIGCSGPRYNETAAGANSTDRGFTVLGEVWYYEHVYGPPQQGSTIPVNASSSYQTNCAKADGAISYYERAEGSEKVPGVPF
>KAH9879020.1 hypothetical protein J1614_002455 [Plenodomus biglobosus] | Cytoplasmic effector probability: 0.641
MRAHPIFAYPLATVCLYLACSAESRPFDSIIRSFDILGKQSPLRSYIMGTPGGQVSTGVIISDVIGKTQNIAIFSGLTRDVDAVAGRLDDAAQNTTVLAPDNSIMRSLKRKPWEDPEDYNSFGANAYEGSSGEDRARKNLERFVQRHIVTESPWEEGKKVKTLYGNEVWWESKDGQKKIQPGDIAVSSIADKVSNGEVWIVQGHQHSCRNSWKQVTISFTEVINKHYQPC
>KAH9879155.1 hypothetical protein J1614_002592 [Plenodomus biglobosus] | Cytoplasmic effector probability: 0.65
MVRSTALFAATAALALNAQAESMYGKGSSVLQINGMDYDRVIAKSNYTSIVEFYAPWCGHCKNLKPAYETAAKSLAGIAKVAAVNCDDEMNKPFCGKMGVQGFPTLKLVRPGKKPGKPTVEDYQGPRSAKGIVEAVKDKVPNMVKRVNDKNLDEWLQENKDSAKAILFSDKGIVSATLRALAIDFAGLIPIAQIKKSEKAAVEKYGITDFPSLILLPAGSETPIKYDGKVEKAAMVKFLSQVAPPNPDCPAPKEKKPKAKKDSKKESKSSSKFAKASSAHKSDDASSAAASATEETVEEPIAATESPDANLKDETTPEPIVIPEEELKPTISILAEAAELQSLCLNEKSKTCILAILPADEASDAAKTAVASLASIHKKYESIGSNLFPFVGVSASNPL…
>KAH9879434.1 hypothetical protein J1614_002874 [Plenodomus biglobosus] | Apoplastic effector probability: 0.516
MKLTTLSISFLSGSALALVIPTPNVAGTVGVGTLANAGANLGPRQTPCTSVIVEAGTTLSSLTATLGVTSAQIQAANPGVTLNPLTVGSTIQIC
>KAH9880152.1 hypothetical protein J1614_002178 [Plenodomus biglobosus] | Cytoplasmic effector probability: 0.588
MKYTTICAAFFAAVATASDVHQLNKDTFKSFIDENDLVLAEFFAPWCGHCKALAPEYETAATTLKEKDIKLVKVDCTEEADLCQEYGVEGYPTLKVFRGQENVSPYAGQRKADSMISYMTKQALPAVSDVTKDTLEEFKTADKVVLVAYFAADDKASNETFASVANGLRDSFLFGATSDAALAKAEGVTQPGLVLYKSFDDGKDVFTEKFDADAIRNFAKLASTPLIGEVGPETYSEYMAAGLPLAYIFAETQEERDEFAKELKPLALKHKGEINFATIDAKNFGQHAGNLNLEIGKWPAFAIQRTDKNEKFPYSQDKKITEKDIGSFVDDFIAGKVEPSIKSEPIPETNDGPVKVIVAHSYKDIVLDNDKDVLVEFYAPWCGHCKALAPKYEELGQLY…
>KAH9880184.1 hypothetical protein J1614_002210 [Plenodomus biglobosus] | Cytoplasmic effector probability: 0.727
MILPLSSLALGLLSASPLACALSASDIPADMPVSQLIKDAGVKLATGDTHDALTYFDVAISRDPQNYMTFFRRGAAYLSLGRTTQAQHDFDKVLELKPGFEGALVQRAKIRARKADWAAARKDYEAAGKTHEIAELDEAQGAAILAQEAAAKGDWEACVSHAGTAIVVAGGAYDIRKLRARCRFEKGEVIEGISDLQHLLQINTGDIEPYLQSSAMAFYSLGETDKGLKHIAQCLQSDPDSKVCMKLRRREKTLEKTLKKVRTFFQKRQFATASKLLIDRGEEEPGLLKEVKQDFQDYVAAGYIYPSSPQGLYQSLVEMTCEAYIEMNNFKKGTPYCIEALQLNPDSLHGSLHKAQIQLDSDDFEACIRTLDHVKEHHQSQKLNEMYNKAQTLLKRSKT…
>KAH9880194.1 hypothetical protein J1614_002220 [Plenodomus biglobosus] | Apoplastic effector probability: 0.706
MKSFFSLAAFVTLVVAIPTSLVPRAEECPTIDQIAPTGQLPPGTLSPVFLQPVSKQNPNKAFPAGQSAIVTPNDKCTITQFNIPASAQNNTCSLVLTLGDCGGKAYQEGPGNIIFQGLTGTSFPVPGETTYANQPPLAEPFPDSPQITLGNAYRLGGGPCDYTPGQAFTSVGGSICSTDTTLSFTQSYGGNGKCPIGFHLIIT
>KAH9881249.1 hypothetical protein J1614_001745 [Plenodomus biglobosus] | Cytoplasmic effector probability: 0.728
MWKPTVLLAAALAVPAHGLHFFIEGAMQKCFFEELPKDTLVVGHYHAETWDDATKAYKTKAEVNVFVTVEETFDNNHRIVAQRGSAEGKFTFSAADSGQHRICVTPQNVPSASGGWLGTGIHGTVKFTLDMAIGETSRIESTDKDKVETLVQKVKDLNSRLQDIRREQVFQREREAEFRDQSEHTNSRVVRWTIIQLVILGVTCVWQLSHLRAFFIKQKLT
>KAH9881776.1 hypothetical protein J1614_000947 [Plenodomus biglobosus] | Cytoplasmic effector probability: 0.729
MLLRIATPLSLFASCRLAAWPPVLFCPEPPTTLAPSRTFARGDQPQNANALNLLRPTTIGTPRTPLCFTGDIKMVPVPVDLNSLSSNWKILQARLKPATPTAPAKHRNLEEEHQASLKRKRPQDAREKQANGAVKSAHGLDKDKGTPRKAPSSRKRQRMDEPASVGASVKHHDSKALSRSVSMPSLKKKPLLAAAEDVAEASSILDPHPDFPDIENEGVSETALPGKYVALDCEMVGVGPEPNRDSALARVSLVNFHGHQVYDSYVQVPRKIEVTDYRTAVSGIEPKHLRPDVARTFDEVRSDLTILLAGRILVGHAVKNDLDVLILKHDPRFIRDTSKFSKFRALAAKPGWTPGLKMLADKLLGVQIQVGAHSSVEDARATMALYRLEKADFEQEIRQ…
>KAH9881778.1 Major allergen Alt a 1 [Plenodomus biglobosus] | Apoplastic effector probability: 0.85
MQFTTFAASLIAAAGLSAAAPLDARQAAPATCPAPTGDYVWKLSNFYARKPDGQKINSIGFNIKATNGGRLDFNCSASADTIVDRQWYSCGENSFMWFAFQSDRNGLMLQQTVSDDVELIGTATLPNVCRAGGNGPNDSVCTGVADAYITLVQYNDIDRVDVPDVPDVPDVDNDNDHTDD
>KAH9881893.1 hypothetical protein J1614_001064 [Plenodomus biglobosus] | Apoplastic effector probability: 0.636
MRTDSVLPALALAITGQVAAVPATRESTDACNVTTFDGIPAAVAACNQITLDGITVPGKSTINLTKLKQGSKVTFKGRTFWEYANANYPFITVTGTDVEITAEKDAVLDGNGQSWWDGQGSNGGVPKPNHFIELKKVLGKSSVHDIYIQNYPVHCFSITGSAGLDIHHITLNNSAGYAPNDRSKGLPASHNSDGFGLASTNNTVVHDCTVINQDDCVAVTSGNNILINNMHCNGSHGLSIGSVGGKSNNIVTNIQFRDSVVSNSENGVRIKTNENTTGLIQNILFENIRVENISTYGIDIQQDYLNGGPTGNPTNGVTIKDIAIRNITGTATKEGRNYYILCGSTSCSNITIDDVNITGGGVPSLCNYKTNGNFDCDGKFQ
>KAH9881966.1 hypothetical protein J1614_001137, partial [Plenodomus biglobosus] | Apoplastic effector probability: 0.761
MVQILSITALLLTIALGVEASHRCQCLFPNRGHCCATVLLFLSVNGPTEDCTDVCRNASRMKDGVRCNSGGQWSNVSAWNVRWREPCN
>KAH9882017.1 hypothetical protein J1614_001188 [Plenodomus biglobosus] | Apoplastic effector probability: 0.826 | Cytoplasmic effector probability: 0.635
MKAFSYLIAGAALLPELAAGLNATANDAIWKYQGCYSDKSYQDVSANGVAARGVPYFPRTLNGLFVRNATNSGKACRDYCLSNLFPVAATNNDQCWCDTTISKNGTSATAPTYGIRDPDDSNCQQPCPGNLSEACGNSTANAPVQRLTVYQMSAEEKEEEYGNAGKGNLWPGYGESGDQGGKEKFGEELFANGNVWSGLG
>KAH9882054.1 NAD(P)H-dependent D-xylose reductase (XR) [Plenodomus biglobosus] | Apoplastic effector probability: 0.861
MVSFTSLITAFAAATGALAAPATDVSVRSSGDLVARQSTPNAEGTHNGCFYSWWSDGGSKVTYTNGNAGSYSVTWGSGGNFVGGKGWNPGSARTITYSGTYNPNGNSYLAIYGWTRNPLIEYYVVENFGTYDPSSQATNKGTVTADGSSYKIAQSTRTNQPSIDGTKTFEQYWSVRQNKRSSGSVNMKTHFDAWASKGMRLGSHYYQIVATEGYFSTGSASITVNCP
>KAH9882077.1 hypothetical protein J1614_001249 [Plenodomus biglobosus] | Cytoplasmic effector probability: 0.791
MNRILRVPIGALLLLSCAFNVSAHGGATEHSQVEVAPDADWATRHMAEEHHISGFDATTFFNLHDYESTGLWTTKDIRRTYGLEDVSSASISENKKGAVVQTVLDMFDVDKDGAISLAEFLRKDQEGVKLPDFGMGPGHHGDDEYEYEIHHWEKYHSGDDVKEEDLTHPEDIAHFKMHEEKEAAQEEWERLELRGVVEKNIPAKYRRN
>KAH9882246.1 hypothetical protein J1614_001418 [Plenodomus biglobosus] | Cytoplasmic effector probability: 0.76
MMFPSLAIFAAASSLLSCVTAHSMQMKAHQRECFHETLHKDDKMTVSFQVGDREFGGSGNLEIDFWIETPSHGYEIHERGVPGGDYSFTAKEDGKYTYCFNNEHWGANTKEISFNVHGVVYVPESEAPQDPLEKEVRQLSELVSQVKDEQSYIIVRERTHRNTAESTNSRIKWWSIFQLMVLIGQGVFQVWWLKRFFEVKRVV
>KAH9882472.1 hypothetical protein J1614_000708 [Plenodomus biglobosus] | Apoplastic effector probability: 0.798
MLTTTLIALTLAATGLAQVPVGYRRVYITSKQDTKFVIVPKGRTAGNTLVVQSLTSKPEQQWYIKANATSIQLADTTLCMDAGPKSGWKDMANVYIRECADTEQQKWVAQDDGRISLQASTGTQQCLDLQYLRATQNNPVGLYNCAGLGNTGAADKGINWPLLDATV
>KAH9882649.1 hypothetical protein J1614_000885 [Plenodomus biglobosus] | Apoplastic effector probability: 0.62
MLSNTVLILLASFVGAQAETISGLRDCPYRETEVNTFDGGKYKICPGTDYQGQTKSVSYGFPSAYECAMLCSETRNCRQSVYEPGNGGCHLKSGDLKWVKSDRYQAIHINRRSQQQRSAPLNGCPTRETMETIYGVTIASCPNTDFEGETKAVMQGARSTKDCAAMCAKTPGCRASVYERANSQCHIKSGRMVWKANSRYSTSRLAHIPSNGSRLDNCPDQFQVEGGSGSVFYACINADWKSNSLDIIGGVDSVQACANICGNTLRCTKSTWDAMNMACHIKGDSTLIFNQGFTSLLQG
>KAH9882686.1 hypothetical protein J1614_000922 [Plenodomus biglobosus] | Apoplastic effector probability: 0.919
MKLSINTFAALFSLFIPSITACKDASISGTIVYKQGICPTAADITASCNNVKDGLIKYSLANSNAWGHEMSIETKCDECFAPGFPGLNTCTCTVTAHRYREWLSPIPFENFMHEVKDWGSGGSGENPKWVVSGSNKTRKCD
>KAH9882915.1 hypothetical protein J1614_000281 [Plenodomus biglobosus] | Apoplastic effector probability: 0.581
MRFTDVFTASLVVPLIAAHGGDHFHAAPKIVGLRRHDVAALKSRNIFDGREARVVRPNQDSKLVARQAGGDENGRCGPDFGCATCSPGNCCSDAGYCGNTSDHCAAPDCKFQYGPACDANKVPAGGSTRDTPRTQLGSQTYGGEGIYSCVTPGTVALTYDDGPYTYTDELLDLLKTKNAKATFFVTGININKGAIDTTQSWSDVIKKMVAEGHQVASHTWSHQDLSAITSEQRYDQMVRNEMAITNIIGKFPTYMRPPYSSCTAASGCEKDMADLGYVVSYFDLDTDDYNQLTPEKIQVAKDNVAKGLAGTNPAVDSRHAIAHDIHQLTAQNLSSYMVNYIDSLGYKMVTLGECMGEPEANWYRTPSARTASTASFAAPTACSSGAFSSTAANNSAPAA…
>KAH9883182.1 hypothetical protein J1614_000038 [Plenodomus biglobosus] | Apoplastic effector probability: 0.593
MYISLATTLLLTTVSAFSPIKRATDLIPETVLNTKSSLEQYFNYNYPWGETHNGAARMDPAHAVISSPGVLTITAQHVSGQPPAGKKGNLVINYLSGTVHAKQQFTVSAGGGLVFYATLQAPVAKGTWPAFWLTAVNGWPPEVDMAEFKGTGKISFNTFNTSSIVASTNLPYESPEKWHDVKCQLEDNGGGVVKVTFWLNGRVVATQYGRDYVGKPMWFIINLQMEGSSGSPGPTANTTYSIKNLKVTTL
>KAH9868113.1 hypothetical protein J1614_007185 [Plenodomus biglobosus] | Apoplastic effector probability: 0.601
MKYTAVPVLALISFSSAIPHPQFSFPGFGSGGSLPGNTGTPSFGSGSGSGSGSGSGSSWSDFFGGGFGSGTRTPAVPAIPTATGTQPGGAAPQPTGGAGTIGSNCTPQGAGGRSSENGVKNNNCCTDMTIIFARGTGETGNVGSVAGPPMFRAIRASLGADRVTVQGVDYPASAGGNVNQGADGGKIMAGLVATALSQCPNTKIIVSGYSQGGMVVHNAFRNGLSSSKVAGAVLFGDPLKRQAVGDMPANKVKQFCGVSDTICGGGGDGGATGGHISYGSSANAAASFAIQAAGLA
>KAH9868689.1 hypothetical protein J1614_007761 [Plenodomus biglobosus] | Apoplastic effector probability: 0.765
MHFCSLFAVSVALISSAHAQFSGYYNISTALRVNTPTYLHYQNVSRTITSHERYESLQQWYFTGSQSGYYFIANRQGGVITAVGSGQQVRGDQFDPNMISHQAWKVIEVADGLYEFESKEYPGNVLDIFPSSTVDYPAVLVAPRNIPRARNQLWMIGKPTIDTIGTYGW
>KAH9869947.1 hypothetical protein J1614_006868 [Plenodomus biglobosus] | Cytoplasmic effector probability: 0.619
MRPTTIILAFLGCGSASPLFMEKADHSAKAAIMQRQAIAPSDPGMPSSSAPATDNENNNAGTELEKAAKGANESLVGLGQDIKDNGKDMKNNDKDNDNDQGKNKSLYYTSTMLSTSSVSSTPSSSSSSMSSTVSSSSSVSSSASSSASSSSSVSSTASSSASSSESSSATSSSASASSSESSTSSSASSTSSSSSSTSTPSCTAYTTTIYITRDVPTTKTTTSTITVTATATKQEWISKSKSAEHEITHAPTPKPSHKESVPAKETPKKHASVAEAPKKHAPVEETPKEHAPVEEQAPKQHAPVEEQAPKQHAPVEEAPYHETPTEESPYHESPTEESPYQETPNEESPYQQEPTTEESPYYQETPAEESSPHAQDHQVHDLQKAPAAPEVLAPESESE…
>KAH9870954.1 hypothetical protein J1614_006528 [Plenodomus biglobosus] | Apoplastic effector probability: 0.785
MKLTTIIIVSAHALAVTAEPQFCNKEGWGLPGKSFCPGPKAGTKTDKPIRYVYCCEPQHDPQLFPTFRGDCVLPRLPGPEQDAASESCLGTRGTVYCCL
>KAH9871121.1 hypothetical protein J1614_006695 [Plenodomus biglobosus] | Cytoplasmic effector probability: 0.605
MICLAFLVFALLSASQVRTSLLTCPTSPPLFRHGVCSGPPEVFTITHSYKKGLGVFATHDLEVGDIVMRETPTIRIEPPQVRKGHPYPMSAISQRVQEQFQSLPSESQAEIMSLTFHATTMEKETQDRLGLIFRTNAYNTGTDIGLFPKIARINHSCRPNTSYYWSEKLNKRIVFASRKIKKGEEFSVSYIPLLLTRDERQRRLKQYGFKCGCDVCSQDQAGIQVSDARRVELRESFLKLESNLSMAIPQSKKGKGQARERAEASFRLIQLVHDEGLADYYAKAYRIAAINYARIEDWENAAIWSNKGYELRFIEDPKSKLTLEMHHLTSMFLKNWQTQLEQRVNS
>KAH9871166.1 hypothetical protein J1614_006742 [Plenodomus biglobosus] | Apoplastic effector probability: 0.628
MRSSIAKVLAFATGVSAHGYLSLPMSRTGLNAQAGADTCPECTILEPVPAWPDLDAAPVGRSGPCGYNARVSVDYNQPGPRWGSQPVITYKGGETVDVQWCVDNNGDHGGMFAYRICQDQSIVDKLITPGYLPTEAEKAAAEDCFEKGLLKCTDVAGQTCGFNADCQQGQPCWRNDWFTCKGFQDGPKCRGVDNSPINSCYTSIAGGYTVSSKIKIPNYTSNHTLLSLKWNSFQTPQIYSTCADIKIIGSGSTPNPPPTSSKATSATSAVATSTKATSTAAATGCATPAASVAVTFNSKTTTVVGQTVKIAGSISQLGSWNTANAIALSASQYTTANPLWTGTINLPAGTSFEYKFIRVTSSGAVTYEAGANRKYTVPSGCTGKATVEATWN
>KAH9871903.1 hypothetical protein J1614_006161 [Plenodomus biglobosus] | Apoplastic effector probability: 0.593
MVALTLGFLAAAMVTSAVAVPAPEINEAHDAPAAAKRQASCTFTGAGGAAQATQAVKRCPTMILNNLIVPAGTTLDLSGLADGTNVIFQGTTTWGHSAWQGPLLNIGGRRITVTGAAGSILNPDGARWWDGKGDVGSNKPKFFSAHGLTDSSITDLHIMNTPVQAVSIADCNGLTITGMTIDNRAGDALGHNTDGFDIGNSNNIIIDGAKVYNQDDCVAVNSGTQITFRNGLCSGGHGLSIGSVGGRANNVVDTVTFINSQVTKSTNGIRVKGRVNTTGRIDKVTYEKITLSSISKYGILIEQNYSDGDLKGTATSGVPITGLVLKDITGGNSVASSGHNVVVTCGSSTSCTGWTFSNVVVTGGGSRYLQCTNVPSVTACT
>KAH9872059.1 hypothetical protein J1614_006319 [Plenodomus biglobosus] | Apoplastic effector probability: 0.723
MHYSMTFTAVAALAPLIHAHNVVLPRIVGLSPQDLKARDLLGSLGARFASTSEFIKAPDSKVKARQDNDRECGAGIGSCAAGQCCSDAGYCGTGGDYCYSPGCDYAHGPGCPENVTPGGTNTSTVARTKVGNVQYGGDGIYNCVTPGTVAITYDDGPQKVLTSHILDVLDSYGAKATFFVTGNNINKGQIDVTPEFIADIKRMDSEGHQIASHTWTHLDLSAISQIDRKNQMWKNEMAIRNIIGKIPTYMRPPYSSCTGQCETDMADLGYHVIYFDVDTDDYQQDSPTLIQNSKNWFKGNITSNGATAAKSQWLEIGHDIHEQTANNLTDYMLSTLTQLGYKGVTVGDCLGDPKANWYRSAGGAGTANPTTTSRAASRASTAPASTAPASTKTPKVTTD…
>KAH9872090.1 hypothetical protein J1614_006351 [Plenodomus biglobosus] | Cytoplasmic effector probability: 0.6
MAELAIASVSFLFQVFAGCVQGYELILDACRLEKDSQGLLLKFKIEECRLLDWAKLVQLDFRDDKLILNHLSKGIIFNILEQQHKLLYSFGRLHKKYGKFSKPLLEETAHEFVLQPDHWLENGTTEGPKKGVQFPPTEELVEKSLRFMRSVQNAPKRLKWATFDRAKMEALIAKLAELNDKMHEALDKAQMDLLLDMQTRTNDQIVLLNRTMSHMVEIYESSKQHLTYHGRPASIDVDDEFLQDVGPITSGAASQSLAALAQQKFVHLAIEDSQSFSEDSARDIGLDSLESDMHQKELKFEDVRTRNGELLPKDIEEGQRTEAIYNNTPVWVEWKNPEPTGPMQKDQGVEPKVEKRVRKLAALLSKNNRTVKFRAPYCCGYFFDREDGRFGLVFEKPAT…
>KAH9872128.1 hypothetical protein J1614_006390 [Plenodomus biglobosus] | Cytoplasmic effector probability: 0.563
MGRRHVNSIALLLPVLAATSNAASEPSRPRGVGPEFAKYYKDPATFTCISNPSVQIPVARVNDDYCDCPDGSDEPGTAACSYLSPLSPPQPPSFQAGEAKSAPALPGFYCKNKGHMPSYIPFTRVNDGACDYENCCDGSDEYDHVGGVKCEDQCAKIGKEWKKQDEMRQRSLNAAKQRRKELIAEAGRLRKEVEERITTLKTQIEGQTLKVDGLTKNLAEVERAERGKVVKGAGKGGKVTVLASLAKERIQELTDNVNRVRGERDAAKARVDELEAMLKRFKDEYNPNFNDEGVKRAVKAWEDYAAQDRPGPNDALDRDLDEILKPDSESAIKWEEFETTDEESDVELLYQFEAYLPAPVRDWLDTKLRDLRDVLIENGILASPSPSDAPASKLVTSAK…
>KAH9872577.1 hypothetical protein J1614_004970 [Plenodomus biglobosus] | Cytoplasmic effector probability: 0.943 | Apoplastic effector probability: 0.734
MRANIIFVVAACLGMTEATRRRCRLDDAKPGEGWYYTVQGDTLQKLQDDFCDREGLIRKWNNIQGHLPMATSLKVPCNARHKRDCLKNRGRSDGAYQIVSGDTLNSIGADFCTTGEDLQLANSNTVPDKDKIFPKQIIYVPCNFH
>KAH9872827.1 hypothetical protein J1614_005221 [Plenodomus biglobosus] | Apoplastic effector probability: 0.521
MYLFGALCFASIASSANVALSRTGWTATADSFQVGNEPAKALDNDATTFWNSKYSPAPVAPLPHWIVVDMKATYNVQAVSIQPRPASNADGRIGGHKVEVSTDNTNWQLVALGTYNNDATTKKTTFVTRPARYVRITATSEAQSTSNQWTAIAEINVFQDTAPYTAPAAGKGLWEKTVDFPLVPAAVSLLSNGKILIWSAYAKDNFEGPGGFVSAAL
>KAH9873027.1 hypothetical protein J1614_005423 [Plenodomus biglobosus] | Cytoplasmic effector probability: 0.558
MHLSAILLAAAYVSTTSAALTWSLQKATNPTADQRDAYTRIEAAMTKAVARYARYSDAVKTIRVAYAPGVPTAEANYNGDLRFGTNRAYMTERTAMHEISHTLGVGQTAAFGRKCAAGDWRTALPLLRSFDGPSANLNCDRSHFWPYGLNFETEWSETNANRHVQMVEAMLTDGM
>KAH9873226.1 glycoside hydrolase 28 protein [Plenodomus biglobosus] | Apoplastic effector probability: 0.759
MVAMKITSLLLSAGALVSAVPTSLDARDDCTFTDAAAAIKNKESCTAIVIKDMTVPAGTTLDLTGLKSGTSVTFEGTTTFGYKEWTGPLISVSGTNIKVIGASGHLIDGNGAKWWDGKGGNGGKKKPKFFSAHSLTSSSITGLNIKNTPVHAFSISGAKDLTLDKITMDNTDGDVANGGHNTDAFDVGSSTGVYITNANIKNQDDCLAVNSGTDIKFTNGTCSGGHGISIGSVGGRSNNVVKDVVISDCTIIDSDNGVRVKTVSGATGSVSGVTYKNITLKNITKYGIVIQQDYENGSPTGVPTTGVPITDLTIQNVHGTVEPKGTNIYILCGKGSCSNWTWSGNNVTGGKKSTSCLNIPDGASC
>KAH9874868.1 hypothetical protein J1614_004355 [Plenodomus biglobosus] | Cytoplasmic effector probability: 0.5
MRFTAIVATLALASSAFAHPAHKEDSLFKAMKKAGRTFIGTALTLRNESREGEIMRQEFNAFTPENSMKWESTEPSRNNFTFQDADRYAAYAIKNRLQVHCHTLVWHSQLPTWVSGGGFDNKTLIDIMENHIKQLVTRYKGVCTRWDVVNEALEENGTYRKSVWLDTIGEAYLPIAFRLAKKYDSKVALYYNDYNLEYNSNKTAGAVRIVKLLQAYGVKIDGVGYQAHLASEVTTTAEGPTPDQNTLEAALRATANLGVDVAYTEIDVRMNTPATPEKLQVQAAAYERIAKSCMAVKKCVGMTVWGISDKYSWIPGVFASEGAALLWDEGYSKKPAYASFLKGIRARKQWY
>KAH9875003.1 hypothetical protein J1614_004491 [Plenodomus biglobosus] | Cytoplasmic effector probability: 0.61
MRFTRIIPLLPLASSLVITDAQIFQDLEKSGRSIVANAQNVLDNAIIRVKDTGKDIYSKIHDTGCDVESWLEGSFADSVIDFEEHAHHSPKDDPPQHQKPHHSQSYRVDHDKPNRTVYELINESNYTTKLAKLINEYDDLVQLLNGTKANYTVFAPTDEAFEKIPAHGKKPSKDQLKDILLYHVVDDFYPAGRVLHSYTIPTLYTPEHLLGHQQRLTVRVTLKGPAINFYSRLVAVNIFGTNGVVHGLDSLLVPPPNVAAIIDLLPGEFSTLELALSKTGLWEKINSTDYPHEGGTFFAPSNFAFQKLGERANAFLFSKYGEKYLKALLEYHMVVDQTLYTDAFYDHKGKKETQVADRPPYYHYDLSTVLSNKYLAVDVARYGPFVTIRINGFSRVTVH…
>KAH9875198.1 hypothetical protein J1614_004688 [Plenodomus biglobosus] | Apoplastic effector probability: 0.871 | Cytoplasmic effector probability: 0.631
MRFATLALFSLVSTVFAGNCGSKNGNAKCAAKECCSQYGWCGTTVDHCDTKTCLKDFSGRDSKCKSGGPTTPAQTFPAVVPEIDVCGHAKGGVTCPGAGANGYFYRCCSSAGHCGPKNDLQDQNIYCGAGCQAGFGKCDNKPKPAPPTQAPGTAGAGDTCGPIVNKKCAAGLCCSGSNFCGSGEDFCGSANWCQSKWGKCN
>KAH9875258.1 hypothetical protein J1614_004749 [Plenodomus biglobosus] | Apoplastic effector probability: 0.795
MHCTTTTLLALLAGSASAVVGDWQQCGGSDWSGETSCGSSAGCVKINDHYSQCQPGAAPVEPQPNLDPIPEPQSTATAGTPTTTTVPSSTGPGKTLQSGYYWIRAVAAPNFHKYIQSSPLYSPGPALLESHTSAGQLQVVSGQLVQLVSAPGEPVKLLYAVVNETRVINDMSLAVTFSESKNTYGTFAFGGDDLQWSVAGVNRPNKSAWYVCAGQRLYINLGNYAYGTPSGCADQTIHYYNDKTANN
>KAH9875389.1 hypothetical protein J1614_004881 [Plenodomus biglobosus] | Apoplastic effector probability: 0.669
MYTTSLLIAGLASLADASPVEVRQIGSTGTTLNEFTEGGCRDIMFAWARGSTERGNMGTIVGPPTSNGLKQAFGADAVATEGIDYAASIGTNALPGGTDSSSKNLMQDILTSMASQCPDSIIVTGGYSQGAAVNHRTIEDLPTTVQDQIAGVVLYGDTQKQQDNNQIPNFSADKVKIICQVGDAVCRGTLTILPAHLTYGARADEGVEFLATQIRGAQAKIKARNAKREVEGKAIDVLEKAKRVAVDLIV
>KAH9860470.1 hypothetical protein J1614_011801 [Plenodomus biglobosus] | Apoplastic effector probability: 0.754 | Cytoplasmic effector probability: 0.501
MFIGVTVALALASCISAAPSNALEARQANTLNAAIVARGRSYIGTSLTIRNDNTEQNLIKGAEFGSITPENAMKWDATEPNRGQFNWGNADQIANFATQNNKQMRCHTLVWHSQLPNWGRKFHVQSLCKTRTDCDVTVNQINNNATLMSVMENHIQQVMGRYKGKCTHWDVVNEALNGPSVPTLYPHTYLMVPNNIATTRN
>KAH9860661.1 hypothetical protein J1614_011992 [Plenodomus biglobosus] | Apoplastic effector probability: 0.787
MQFFTTAISSILLLGTAAYPSTPHPTFCGIRGYDYINKPYDVQQDSRIRTVAECRFQCLLTSRCNSYAVGKGACVLYDYDTLETFVPYDGSKYLFYDRACDPNPSPDPEPTPDPDPSPPPVAETCSVTGLPPLFTCGTDIEANGYIQILDPNTNEVLGYVHNSLSPFNIFQKGLLANALIVKAKYTSTDCSSPTGVALELQNVQPDDIQPGYLGSAGSFELSDNWGTYG
>KAH9860804.1 hypothetical protein J1614_012137 [Plenodomus biglobosus] | Apoplastic effector probability: 0.712
MKLSTSTLLSLVLFTIDALSLPTESTESFDITSELQGLAKRQYSGNTYNQLTDGTACRRVTVIYARGTGQDGNVGDPAAVGPLFFNELSRRIGGTNQLAIQGVTYAANVPGFFQGGDRAGSTTMTNLISTAATRCPSTKIVLAGYSQGAQLVHNAAQRTSAANAARVAAVVVLGDPKRGQSFGSITASKILTICHDGDNICEGGSSITPAHLNYQEDAPEAATFVAGKV
>KAH9861671.1 hypothetical protein J1614_011424 [Plenodomus biglobosus] | Cytoplasmic effector probability: 0.501
MRYSMLSVLPALAAASPTFSVETIHNDAAPVLSSTHAKEVPNSYMVVFKKHVKDTHAKEHHDWVQSVHSKSQERMELKKRSDFPVSSAIFDGLKHTYNMAGMMGYSGHFDDETIEAIRRHPDVDYIERDSEVHTLGSDDYETEKNAPWGLARISHRDSLTFGSWNKYLYAADGGEGVDVYVIDTGTNTKHVDFEGRAKWGKTIPNGDADEDGNGHGTHCSGTVAGKKYGVAKKAHVYAVKVLRSNGSGTMSDVVKGVEWAAKAHIDTVKAAKDGKKKGFKGSAANMSLGGGKSTTLDLAVNAAVDAGIHFAVAAGNDNADSCNYSPAAAENAVTVGASTLLDERAYFSNYGKCNDIFAPGLNILSTWIGSEHATNTISGTSMASPHIAGLLAYMLSLQP…
>KAH9862737.1 Exopolygalacturonase [Plenodomus biglobosus] | Apoplastic effector probability: 0.557
MRVTELLTFALLQASAVISTPLEERQAKDVVSKRPNHAVSPRHPGKVFAPSPERTKTCVVKANGGGKDDSTNVLSAIKDCNNGGHVLFSKGSSYTIGTALDLTFLKHVDLDIQGTIKFTNDTDYWQKNSFKHEFQNATTFFQLGGEDVNIYGGGTLDGNGQVWYDLYAKDIYILRPILFGVIGLKGGRIEDLNLRYSPQWYTLVANSSEVVFSNIDIAGGSKSKNPAKNTDGWDTYRSDNIVIQNSHIDNGDDCVSFKPNSTNIVVQNLVCIGSHGISVGSLGQYANEVDIVENIYVYNISMSDASDGARIKVWPGASAALSGDLQGGGGSGAVRNITYDTMAISNVDYAIEITQCYGQKNLTLCNQFPSKLTISDISIKNFKGTTSKKYDPRIGYLVC…
>KAH9862920.1 hypothetical protein J1614_011013 [Plenodomus biglobosus] | Apoplastic effector probability: 0.589
MRTILLVAATLVPAVLSVGRGGQCGAGARQCNTGLCCSQYGYCDTTEYHCGTGCQSAYGTCYGLTPAPVAQANDACGAGKTRCGNNLCCSQWGYCGSTSDYCGTGCQSGFGKCNAASSSVLASSSSAPVLASSSSAPVLASSSSAPVLASSSSARPTTTTTTTTPTSQATTTTTSSATATSTLTPTPGVYAYLDEKCGPTVGKKAAPGKSANSGLCCGAAGTAGYTDEHCGTGCQSAWGRCGKTMPTVLDRCTKPGSFALTFDDGPSVLTQGLLNYLNSQNVKATFFVNGLNYKNADTLNPLPGIYSLASVVRAAYDAGHQICSHTWSHTDMITVDQYNVTYELTRLNNAFRQILPDVVPTCFRPPYGDYDFNSLAVLQGMGYGEDSGGAIVTWDLDPV…
>KAH9862984.1 hypothetical protein J1614_010713 [Plenodomus biglobosus] | Apoplastic effector probability: 0.719
MRSTVLVSVLGAATTVCSYATPMTCTGVCTNAHDPALIRRDDGTYYRFSTGGKIAIHSAPSITGPWTYKGAAIPNGSKINLNGKDDLWAPDVTKVGDTYYLYYSVSTFGVQNSAIGVATSKDLNTWTDLGATGIASNSGKNYNAIDGALYWDGSKFVMSFGSFWNDLFTVNMENPPVKVVSGASTTNIAFKPEGEHAQEAAFIAKNGNYHYLFFSAGKCCGYDANRPARGEEYKIQVCRSTSATGGFVDKAGRKCTEGGGTTVLESHGWVYGPGGQGVYYDPTHGPVLYYHYVDTRIGYQDGQKRFGINKIDFSSGWPVV
>KAH9863552.1 hypothetical protein J1614_009484, partial [Plenodomus biglobosus] | Apoplastic effector probability: 0.563
MSLRGCLLFLVVQCFSSPVQAVVTPGEVVCRYTASTSDTVNYYICQELSDRYGISVNEFFTLNPTVKTACDNVKVHTEYCVRGYVQKAISSDGFCGPSHADTTCLDTDKQCCNSDTWKCGNQLYTACPALVFREHVWDFLTNTLSTENAASRTAISFAVEGGAVAVMPKANVVTALPSVPRTSVNQGTVKLVSKILGPSTDRALVPVLRYRVQEKPVLTALAAVQISISARIRPSETAVAVLASVDPQQHIVLQRVRRILELVLSLMFRLMELVVVRISLNATGQASVTAVVLLDFVVLLPHIALAGVLKATNAKAPRLEIAVAILGCQSNFGDCVIPVGSGELPSSSKVSLDGTCGGSAGLTCGGSTFGNCCSSGGYCGSSVDHCAQGCQKSFSSACL…
>KAH9863554.1 hypothetical protein J1614_009486 [Plenodomus biglobosus] | Apoplastic effector probability: 0.705
MRLYVSTAISILLSPLASAACYKKGPSNVNVQVAFDQMDTTASFLQGELVGGQERGLCVTDLATGTHWYMSVRNEDSGKGRLVTKADIDTYLRREINGCGTKGGHRGESGVEYTYVYVSWIFLGIR
>KAH9863575.1 hypothetical protein J1614_009507 [Plenodomus biglobosus] | Apoplastic effector probability: 0.856
MISIKQLALFALVSGFASVDAQATGKTTRYWDCCKGSCGWDGKASVSSPIRTCDKSDNPIADINAKSGCESGGRAYMCTGQSPWAVNDNLAYGFAAVKLAGGSESSWCCACYEYVLT
>KAH9863604.1 hypothetical protein J1614_009536 [Plenodomus biglobosus] | Apoplastic effector probability: 0.723
MVPGAYFPVPYLWLPLMSTPQSALGGMVYGVPCGKVVGGGSVVNAMFFHRSDAELYDTWEELGATGWGWANLIPYFKKPAQEPNNGRAQGVFRLVRSVDAETQTRSSARVNRYDRDAQRPNYHILANTAVSRIIFQDNTAVGVAFVSNNNGTQSEVRARKEVIVAAGSVHTPQILQLSGIGDATHLKSLGIDPVSDLPGVGHNLQDHLVLKVNYNCK
>KAH9863808.1 hypothetical protein J1614_009740 [Plenodomus biglobosus] | Apoplastic effector probability: 0.65
MISKVAVVALIASIASAQTLNIPTRSGSIVALPSPSRISGSQDMGNREFSRGRPCDTDADTGSDSAVFILENGASLSNVIIGKDQLEGVHCLGACTLTNVWFREVCEDAISLLGRGDALIVGGGAQDASDKVIQHNHSGRVTIRNFTVVNAGKLYRSCGDCTDNSSKSPRNVVVENVRAFGITSDLIGINSNFGDTASITGSCGSTKKVCQEYRGVNKGNNASSSKVDTNANCTGSQGKLNSLPACSRRAARAESGFTRVVRST
>KAH9863964.1 hypothetical protein J1614_009897 [Plenodomus biglobosus] | Apoplastic effector probability: 0.676
MRLSNLVSASLLAPLVAAHGGIPGAPKLFGLPRDLDSLKAPTAARVLRHASEPKRGLLETRQGGQNGRCGPDFGRASCAAGYCCSGAGYCGTTKDHCAAPDCLIDFGPACDGNKTPGGASTRNDARPQKGNVAYGGAGIYTCQKAGTVAITYDDGPYIYTSQVLDQFAQYGFKATFFVTGINLGKGAIDTTASWSNVIKRMVAEGHQVASHTWSHQDLSIISDAQRYDQMVKNEMAIRNIIGKYPTYMRPPYSSCNAACQTVMKNLGYVISYFDLDTDDYNQLSNIQVAKDNFKRILDQTPGGPQSGDRLAIAHDIHEATALSLTGYMLQYLKSKGYRGVTMGECMGEPEANWYRTSGGGGGGSTPPPTTNPPSGGNVSSDGKCGVQGGATCRGSSFGN…
>KAH9864501.1 hypothetical protein J1614_010435 [Plenodomus biglobosus] | Apoplastic effector probability: 0.848
MVSFLVATVALLSATASAATLRRQALPCGANGTVSHTIASGETLETIATRYSSGICDIASFNQIANANVIEAGATINVPTFCSTPDSTSCVAPVPTATCVFGVGSSYVVQSGDSLNAIAGDFNITLASVIAANSDIANPDLIQVSQVINIPVCPNSCCDWVGTYNIKSGDTFTALAKTYGTTVGQIKALNSRVDPSNIAIDQQIILPQNCRD
>KAH9865348.1 hypothetical protein J1614_008931 [Plenodomus biglobosus] | Apoplastic effector probability: 0.577
MRFTDVLTVSLVAPLVVAHGGTEGAPKFFGLPKDLRARNPFAGYQGRHADLPNNVLPKRQEADPERCGTQGGGAVCASNKCCSPEGYCGTTTDHCKAPDCQFEFGPACDAHYTPAGASTRNDPRPEKGSVLKGGEGIWSCNTPGTVAITYDDGPYIYTEGVLKLFKEAGMKATFFLTGNNLGKGSIDEKWSDVIKQMYADGHQIASHTWSHQDLSLITENQVYDQMVKNEMAIRNIIGKYPTYMRPPFSSCRADSSCQKVMKALGYVISYFDLDTADYTTLDNIAVAQANFKYGIDNINNENVMGGNGDKLAIAHDIHRATAVDLTKYMLDYLKANNLRGVTMGECLGDPEANWYRDSTASPPRVSSTSVSAPAPTPTGPTSVDGACGTKSTEGKGQSC…
>KAH9866157.1 hypothetical protein J1614_008722 [Plenodomus biglobosus] | Apoplastic effector probability: 0.828
MQFKNIIVTLAVPAICIAAALPAPQDPVEPEFPEGTSDNIVGGVAASAGDVPYIVALSKNGGPWCGGSLLNANTVVTAAHCLIGSPASAYSIRAGSLNRASGGTVSQISRIILHPNYVDRVSYDNDIAILKLATSIPATNGVTYATLAASGNDPAAGTTVTTAGWGSTASGSSASPTLLRKVDVPIVSRATCRSNYDATSVTNNMFCAGFAAGGKDSCQGDSGGPIMTSSKTLIGIVSWGGGCAAPNQPGVYSRIGTLRDFVQANL
>KAH9866519.1 hypothetical protein J1614_008209 [Plenodomus biglobosus] | Cytoplasmic effector probability: 0.619
MRLLTLLPAALLAATTQATDDASAADASPVPEPTPVGALWTASWSTSSLSPYTIHCRATTSYTTSIYTLAQLYPDLKDAAPQLKVFYNKQLYAGSWGGIDVHGTGRELIKMDMKDVPYKVREWLKKNGTQRHFSVQGDQVFFAPGAIYPLLPLWVDDGSLDNPECEGVFDDLENYSNEPRDGAVIGKIQHTNTGEKEVKFTIEAMLVKKKGAEGEEGRDEL
>KAH9868993.1 hypothetical protein J1614_008070 [Plenodomus biglobosus] | Apoplastic effector probability: 0.552
MHFLSYLPLLASTVSALAFPGAEGFGRNAIGGRNGKVYVVSNLNDSGAGSLRDAVSQPDRIVVFSVGGTIKITDRIVVSKRISILGQTAPGDGITVYGNGWSFSNADDAIVRYIRIRMGKGGASGKDGVGIAEGSNMIFDHVSVSWGRDETFSISGSEVGNITIQNSIIAQGLETHSCGGLMQTNLGNGISLFRNLYIDNKTRNPKVKGTNDFTNNVVYNWGGGGGYIAGDSSAVSEANIVGNYFISGPSTSVTAFTRGNANFKGYVEANFYDSDRDGALNGAELGVAASNYGGLNIQTAKFPFPSPAKILSAAEALRFAEASAGASKVRDAVDKRLVSELQSYGKSGQLISDENAAPMNGPGTIAGGTPWVDANGNGIPDDVESKFSNVEDWANSLVP…
>KAH9868995.1 hypothetical protein J1614_008072 [Plenodomus biglobosus] | Apoplastic effector probability: 0.534
MHASLGLVLSLAAAAVAAPSALVARASRTSAPNGCLTVGSGGKYSTVQAAVNALSKSSTSEQCIYIAAGSYNEQVYIQQLKSALTIYGETADTSSYNSNTVTITQRRSQSDSLNNDQTATLRAHTTNLKVYNINLVNTRGSGSQALAVSANNDKQAYYGCQFKGYQDTVLAQDGRQLYAKSYIEGATDFIFGQKALAWFDGCTIGVLAAKQGYITAHGRTDASSKSQYVINKSKIDAAPRNSVTAGAYYLGRPWGAQAHVTFQSCSLSNVINGAGWSVWNTGDERTGSVTFREYANTGDGAKGKRAFSKMLSAPVSITEVLGSDYKSWIDTSYLS
