# Supplementary material for: Secretome Analysis for a New Strain of the Blackleg Fungus Plenodomus lingam Reveals Candidate Proteins for Effectors and Virulence Factors
Source: J Fungi (Basel). 2023 Jul 11;9(7):740. doi: 10.3390/jof9070740 (PMC10381368; doi:10.3390/jof9070740)
Supplement: Supplementary file 1 [file jof-09-00740-s001.zip › Table S4.xlsx]

## Sheet: Sheet1
Protein ID							Effectors probabilities
>XP_003833499.1 hypothetical protein LEMA_P062600.1 [Plenodomus lingam JN3] | Apoplastic effector probability: 0.541
MRSTSFAPLLLSSLFFSIPLWAQQNGAESSIEYTDDTRFRDVVLDVTNTYRKQHNATALGWNSTLADYAADWSEDCEFKHSGGPYGENLASGYSNVTESIVGWGEEREEYNFNGGQFSSSTGHFTQLVWKNTTQVGCSRTQCNAGQQGGEGDAPGWYLVCEYSPAGNVIGAFGDNVQEAVREDQQPEGPNASGVPSAESVAAGLIKVSWRAQWIVMIASCLCSNLI
>XP_003836412.1 hypothetical protein LEMA_P039480.1 [Plenodomus lingam JN3] | Cytoplasmic effector probability: 0.635
MRFTRIVPLLPLASALVITDAQVFQDLEKSSRSIVDNAQNVLDDAFSKIKDASKEIYSKIHDTGCDVESWLEGSSFDDSVIDFKEHPHPPTEDDPPHHKKPHHDKPDHGDHGKPNRTVYELINESKYTTKLAKLINEYDDLVQLLNSTKANYTVFAPTDEAFEKIPEHGHKPSKEAIRDILLYHVVDDFFPAARVLQSYTIPTLYTPEHLLGHQQRLTVRVTLKGPAINFYSRLVAVNIFGTNGVVHGLDSLLVPPPNVAAIVNLLPGEFSTLELALGKTGLWEKINSTDYPHEGGTFFAPSNLAFQKLGPRVNAFLFSKYGEKYLKALLKYHIVVDQTLYTDAFIDHTGNKDAKAANRPPYYHYDLPTVLSDKYLAVDVARYGPFVSIRINGFSRVTV…
>XP_003836618.1 hypothetical protein LEMA_P041540.1 [Plenodomus lingam JN3] | Apoplastic effector probability: 0.844 | Cytoplasmic effector probability: 0.649
MRFATLALFSLVSTVFAGNCGPENKNAKCSASECCSQYGWCGTTKDHCDAKTCLKNFSGASSQCKSGGSSTPPPQGGQNFPATVPEIDVCGHAENGVSCPGAGTNGYFYRCCSSAGHCGPKNDIQDQGIYCGADCQGGFGKCNTMAKPPVPAQAPGIARAGETCGPIVNKKCADNLCCSGSNFCGTGEDFCGSNNWCQSKWGKCN
>XP_003836885.1 similar to acetylxylan esterase [Plenodomus lingam JN3] | Apoplastic effector probability: 0.78 | Cytoplasmic effector probability: 0.602
MKFTVTATALFASLAAAAAAPQKCHNVYIVGARETLALQENGFGTAAGLVEDVKKAYPGTRADAIKYPACAGQASCGGIDLPNSLKQGTKAVVTAVNEYNKKCPQAKIVLIGYSQGGQLMENALCGSADPNEETINPKALPAVKAAILLGPISFRSDLTYSRGTCRKGGITARPAGYTCSPGKPGIIRSYCDATDQFCCSGKNLPIHSTYVTTYGDDALKFIKQAVDRKN
>XP_003836972.1 predicted protein [Plenodomus lingam JN3] | Apoplastic effector probability: 0.861 | Cytoplasmic effector probability: 0.527
MQFTTIAASLLAITGLSAAAPLEARAEDCPVAKTGDSVWKISELSFRKPDGKNINQIQFNIKATNNGTLDFNCGTQADNVEDKKFYECGENSFMWFTFNQEENILLLQHSVSDDIQYVGAVTLPNYCRAGGNGMNDFICTGVADAYMTLAQYPGLDRPDDN
>XP_003837107.1 similar to chorismate mutase [Plenodomus lingam JN3] | Cytoplasmic effector probability: 0.644
MAAMVVVVVVMVVVVHSGSFILHAALPSPLDAHMDVIDLSDASKALDLANIRFQLIRLEDTITFYLIERVQFPLNSAIYQPGGVDIGEPDISLFDWMLREQERLHSLVRRYQSPDEYPFFPDALQEPILKPLDYPQILHPNDVNVNALLKDCYIKYILPAACSQNDREDRGESRENYGSSATCDVLTIQSLSRRIHFGKFVAEAKFQKEPERFAKLIKAEDRQGIDEAITNAAVEKKVLERLRLKAKTYGTDPDLGANGSSKVNADAVVAMYKDWIIPLTKEVEVEYLMQRLKGTQWESNAPASLKLDAIKRPRSALLV
>XP_003837356.1 similar to endo-beta-1,4-xylanase [Plenodomus lingam JN3] | Apoplastic effector probability: 0.883
MVSFTSLVTAAVAATGALAAPATDVSVRSPGPLVARQSTPNSEGTHNGCFYSWWSDGASPVTYTNGAGGSYSVQWGSGGNFVGGKGWNPGTARTITYSGTYNPNGNSYLAVYGWTRNPLIEYYVVENFGTYDPSSQATNKGTVTSDGSSYKIAQSTRTNQPSIDGTRTFEQYWSVRQNKRSSGSVNMKTHFDAWASKGMGLGTHYYQIVATEGYKSTGSASITVNCP
>XP_003837382.1 similar to secretory pathway protein Ssp120 [Plenodomus lingam JN3] | Cytoplasmic effector probability: 0.798
MNKITRAPISAFLLLSCALSVSAHGGATEHPQVEVAPDADWATRHMAEEHHLSGFDATTFFNLHDYESTGLWTAKDIRRTYGLEDVSSASISEGKKGAVVQTILDMFDIDKDGAISLSEFLRKDQEGTKLPDFGMGPGHHGDDEYEYEIHHFEKYHSGDDVKEEDLNHPEDIAHFKMHEEKEAAQEEWERLEMRGVVEKNIPAKYRRN
>XP_003838983.1 similar to disulfide isomerase [Plenodomus lingam JN3] | Cytoplasmic effector probability: 0.619
MVRSTTLFAATAALALNAQAESMYSKGSSVLQINGMDYDRVIANSNYTSAVPPTSTWHSSYLSRFYAPWCGHCKNLKPAYETAAKSLAGIAKVAAVNCDDEMNKPFCGKMGVQGFPTLKIVRPGKKPGKPTVEDYQGPRSAKGIVEAVKDKVPNIVKRVNDKNLDEWLQENKESAKAILFSDKGIVSATLRSLAIDFAGVISIAQIKKSEKAAVEKYGITEFPSLILLPAGSDTPIKYDGKVEKADMVKFLSQIAPPNPDCPAPKEKKAKGKKDSKKENKKEAKSSSKFAKSSAAHKADEASSATASAADETVEEPIAATESPDANLKDETTPEPIVIPEEELKPKISILTEAPELQSLCLNEKSKTCILAIMPTDESSEAAKTALASLASIHKKYETI…
>XP_003839327.1 hypothetical protein LEMA_P030000.1 [Plenodomus lingam JN3] | Apoplastic effector probability: 0.826
MKFTNTITTITLLATSVLAQTACDPAASAIPTCGLPCISSAASAVGCTDGDYRCRCTSSDAIQSSAINCVIGNCGIPGALEVQASGSAVCACVATAPAKVMAVPTAF
>XP_003839696.1 similar to 78 kDa glucose-regulated protein [Plenodomus lingam JN3] | Cytoplasmic effector probability: 0.66
MARSSRSASKRSTWSIAFYLLLVLVGGLMLAKTAHAADDSAKEDSNAVSGPVIGIDLGTTYSCVGIMKNGKVEIITNDQGNRITPSWVAFTDDERLVGDAAKNQFASNPHRTIFDIKRLIGQKFKDKSVQSDIKHFPFKVINKNGQPHVSVEVHGKETTFTPEEISAMVLGKMKEVAESYLGEPVKNAVVTVPAYFNDAQRAATKDAGTIAGLNVLRVVNEPTAAALAYGLDKTDEKERQVLVYDLGGGTFDVSILAIEEGVFEVQSTAGDTHLGGEDFDNRVINHFVKKFNKENDVDITKDAKTMGKLKREVEKAKRTLSSQKTTKIEIESFYKGKDFSETLTRAKFEELNNDLFKKTLKPVEQVLKDAKLKKSDIDDIVLVGGSTRIPKVQAMLEEF…
>XP_003839986.1 similar to protein disulfide isomerase [Plenodomus lingam JN3] | Cytoplasmic effector probability: 0.692
MLFSRVIPVAIALLPALTVAAGVLDLEPTNFDDVVLKSGKPTLVEFFAPWCGHCKNLAPIYEELAGAFQHASDKVSVAKVDADAHTDLGKRFGVTGFPTLKWFDGKSDKPADYDGGRDLDSLAKFITEKSGVKPKIKAKLPSAVTYLDNQSFKERVGKDQDVLVAFTAPWCGHCKSLAPIWETLAKDFINEPNVLIAKVDAEAENSKALAAEQGVQGYPTIKYFKKGSTEALPYEGGRSEADFINFLNTNSGTHRAVGGGLDATGGTIEAFNSVIEKFQGAYGDGAEEAKKIAAGLQDKYAQYYVKVFEKIGANKDYAAKELKRLQGILAKGTLAPEKVDDVTSRSNILRKFLGMEEKSEL
>XP_003841054.1 hypothetical protein LEMA_P089840.1 [Plenodomus lingam JN3] | Apoplastic effector probability: 0.673
MRSFSLLPIAALCATSLAAPTPAEGVSFPITDLLDSDLTIDEYVRQLEGNSNAAPAVTKRQYTGTTYNQLTDGTPCRAVTVIYARGTTQEGNVGDVGSEGPTFLNALANRLGGTGRLAIQGVDYPANIFGFLAGGDAGGATTTLNLINRAITQCPSTKIVVSGYSQGAQLVHTATQRLSAANAARINAIVTFGDPDQDESFGPVAASKILIICHDGDNICDNGIIVTADHRNYERDAPAAAEFVAARV
>XP_003841449.1 similar to chitin binding protein [Plenodomus lingam JN3] | Apoplastic effector probability: 0.78
MRFSKIVSASLVAPLVAAHGGSIPGAPKVFGLPRNLNAKTPTARVLRHAAEPKRGLLETRQGGQNGRCGPDFGRASCAPGYCCSGAGYCGTTKDHCAAPDCLIDFGPACDANKTPGGASTRNDARPQKGNVPYGGEGIYTCQKAGTVAITYDDGPYSYTSQVLDQFAQYGFKATFFVTGNNLGKGAIDSTSQWSNVIKRMVAEGHQVASHTWSHQDLSVISDSQRYDQMVKNEMAIRNIIGKYPTYMRPPYSSCNGACQTVMKNLGYVISYFDLDTDDYNQLSNIQVAKDNFKRILDETPGGPQSGDRLAIAHDIHEATALSLTGYMLQYLKSKGYRGVTMGECMGEPEANWYRTSGESGGSTPPPTTNPPSTGGNVSTDGKCGVQGGATCNGSSFGNC…
>XP_003841457.1 similar to DnaJ (Hsp40) homolog [Plenodomus lingam JN3] | Cytoplasmic effector probability: 0.757
MILRLSSLALGLLSASPLACALSAADIPADLPVSQLIKDAGVKLATGETHDALTYFDVAISRDPQNYMTYFRRGAAYLSLGRTTQAQHDFDKVLELKPGFEGALVQRAKIKARKADWAAARKDYEAAGKTAEIAELDEAQGAAILAQEAADKGDWEACVSHAGTAIVVAGGAHDIRKLRARCRFEKGEVIEGISDLQHLLQINTGDIEPHLQSSAMAFYSLGETEKGLKHIAQCLQSDPDSKVCMKLRRREKSLEKSLKKVRSFFSKRQFATASKLLIDRGEEEPGLLKEVKQDFQDYVAAGYIYPSAPQGLYQELVEMTCEAYIEMNNFKKGAPYCTETLQLNPDSLHGALYKAQKEIEADDFEAAIRTLDHAKEHHQSQKLNELYNKAHTLLKRSKT…
>XP_003841467.1 hypothetical protein LEMA_P093970.1 [Plenodomus lingam JN3] | Apoplastic effector probability: 0.777
MKSFHYLASFVALAVAIPTDLGPRADCPTIDQIAPTGQLPPGTLSPAFLQTVSKKEPNKAFPASQSAIVTPNDKCTITQFDIPASAQNKTCSLVLTLGDCGGNAYEKGPGNIIFQGLTGTSFPVPGQTTYANQPPLADPFPDSPVITLGNAYRLGGGPCDYRPGQAFTSVGGSICSTDTTLSFTESYGGNGKCPIGFHIIIT
>XP_003841507.1 similar to protein disulfide-isomerase [Plenodomus lingam JN3] | Cytoplasmic effector probability: 0.578
MKYTTICAAFFAAIAAASDVEQLNKDTFKSFIEENDLVLAEFFAPWCGHCKALAPEYETAATTLKEKDIKLIKVDCTEEADLCQEYGVEGYPTLKVFRGLETVSPYGGQRKADSLISYMTKQALPAVSEVTKDTLAEFKTADKVVLIAYFAADDKASNETFTSVANGLRDNFLFGATSDAALAKAEGVKQPGLVLYKSFDNGKDVFTEKFDADAIREFAKVASTPLVGEVGPETYSDYMSSGLPLAYIFAETPEEREQLANELKPLAEKHKGKVNFATIDAKSFGQHAGNLNLEVGKWPAFAIQRTDKNDKFPYSQDKEITAKEIGSFVEDVIAGKIEPSIKSEPIPESNDGPVKVVVAHNYKDIVFEEDKDVLVEFYAPWCGHCKALAPKYEELGQLY…
>XP_003841733.1 similar to endoglucanase II [Plenodomus lingam JN3] | Apoplastic effector probability: 0.501
MKTSSLLALAAAGGSQLVAAHTTVYNILVNGKDQGLGNKAGGYIDSPPNNNPLVDVTSKDMTCNVAGTKATTSVTVAGGDEITFQWHHNNNSPSDDIIDPSHKGPIMVYISKSSPSLSWTKLAEDGYDGKSWAVDKLIAGSYTGKPGQHKVKLPKLAAGDYILRPEIIALHEGNRDKGAQFYMECVHVKVTGSGSVALPAGVVIPGAYRANDAGILFDIYSGRVSSYPIPGPKVWNGGSGGGAAPAPAPAPAPVTTKAPAPLKPAATAPPKKTTLATVAKPAATPATGAVAQMYAQCGGQGYTGAKACAAGSKCTVQNAYYSQCL
>XP_003841989.1 hypothetical protein LEMA_P077490.1 [Plenodomus lingam JN3] | Apoplastic effector probability: 0.723
MKLSTSSLLSLVLFTIEALSQPTEKSFNISDLLNTDLSPEKYFRSLPDPQDQGLTKRQYSRNTYNQLTDGTPCRPVTVIYARGTGQDGNVGDPAAVGPLFFNNLASRIGGTSQLAIQGVTYPANVPGFFAGGDAAGSTAMAGHISTAATRCPSTKIVLAGYSQGAQLVHNAAQRTSAVNAARVAAVVVLGDPKRGQSFGSIPASRTLTICEPGDNICEGGFIITAAHLNYQQNATEAAAFVAGRL
>XP_003842212.1 similar to female reproductive tract protease GLEANR_897 [Plenodomus lingam JN3] | Apoplastic effector probability: 0.693
MQLKKVLITLAVPAICIAAAIPTPQDPVEPDFPEEQAEDIVGGVAARAGDVPYIVSVALNGQHWCGGSLLNANTVVTAAHCIEEGATAADYSIRAGSLDRRSGGVVSQVTRLIPHPEYNTGLTDNDAAIFKLATPVQTSSSITYATLAPAGNDPAPGSTLTVAGWGDDGNGNAPVRLQKVDVPIVDRDTCRSNYPRNPVSENMFCAGFTQGGRDSCQGDSGGPIFDTAKTLIGLVSWGGGCALPNKPGVYARVGTVGAFIRANM
>XP_003842467.1 similar to trypsin-like protease 1 [Plenodomus lingam JN3] | Apoplastic effector probability: 0.826
MQIKDLVVALAVPAICIAAAIPTPQDPVETEFPEESQEDIVGGTAAAAGEFPYIVSLQRSGSHFCGGSLLNGNTVVTAAHCAVGLSGTAVTVRAGSNSRTSGGVTARSSSIVINPGYSSSTFDGDVAIIKLSTSIPTSNTISYVSLPAAGSDPAAGSVATVAGWGTLTSGSQSLPVNLQKVDVPIVSRTTCRSNYGQSAITNNMICAGLTQGGKDSCQGDSGGPIVSSSKQLIGLVSWGDGCAAPGKPGVYTRVAAVLSFINANS
>XP_003838083.1 hypothetical protein LEMA_P116070.1 [Plenodomus lingam JN3] | Apoplastic effector probability: 0.594
MRFTSEMLVALAAVATAGVMAAPPPSFKGQYKVEVIISPGRVDIGDLNWQHEIRDFIYAAKDNQIGIKHNPIEPLLSFTNQCTNHADTNGHLKVHIHMDGSWGTLPGIGPNDAREHLIEAVMQTLHADSDYTGYNVFTNCWGTSWQEGVPIWKGPHACGGTNPTVRPQCMCTVANAQCEKHSWGHTVPSAISARIYDVNSNQKQPQKQPEVHYLNIEFSSDKIEPSKDCGPIGTIISRVTGFLPGPGSLFSSTIDIFCD
>XP_003838281.1 hypothetical protein LEMA_P118050.1 [Plenodomus lingam JN3] | Cytoplasmic effector probability: 0.533
MKVAVILALATAAFAEIINNDHLQTEVLTAVTCSRPTKAGDKIKVHYRGTLVDGTEFDASYNRGDPLDFTVGQGQVIKGWDQGLLEMCPGEKRKLTIQPEWAYGSRGTGPIPADSVLIFESELVSIAGVEKEEL
>XP_003840612.1 similar to Ecp7(P20) [Plenodomus lingam JN3] | Cytoplasmic effector probability: 0.79 | Apoplastic effector probability: 0.713
MRLKFIILVAASIGMSNALRRKCKRNPQNQGEGWYFTTGIDTVQKVADDFCMKPEVVRHWNNINPKDDLRPGVNIKVRCTERKRDCLKNPSGNGAYIVASGDEYKYIAPDFCTSVDKLKELNPKVPHPDTIQPGLLLWVPCPFNDVP
>XP_003840704.1 hypothetical protein LEMA_P103560.1 [Plenodomus lingam JN3] | Cytoplasmic effector probability: 0.703
MRLRTLLPAALLAATAYAIDDPSVADPSSSPEPTPVGALWTASWDSTTLTPFTLHCRTTTTYTVPIYTLAQLYPDLKDFAPQLKVFYNKQLYAGSWGGIDVHGVGRELIKMEMKNVPFKVREWLKKNGTQRHFSVQDDQVFFAPGAIYPILPLWVDDGSADKSSDCKGVFDDLEKYSNEPRDGAVIGKVQHTNTDDKEVKFTVEAMLVKKKVGEGEEARDEL
>XP_003840897.1 predicted protein [Plenodomus lingam JN3] | Cytoplasmic effector probability: 0.659
MKYALALSALVASSYAGAIPGDVQTGIQRRAANPQPVCTFEEHSFYDKNWGGDGNTLANLKRDLGKKTWDPPANLVKPLEEVWKHQMDTYGNQGMNFKNFGYDQVMAAKGKINYCVRWEGNQKVSLSQRGEIETAIRRQFKKWIDVLADFEGFPYKTVDVKVVGWAVNDKNQLEGDVSKIQVYTTKDENGIPECAPGCGRFHHQDGDYSGCKAGADRHYDQSLWLTPGFGGGAGGDWGQRVSTEYFMDNIKQEDIHIVLHEIGHTFALDDFYDWTPTGVDKFLMKAGSAMKITEFDAWMARDWWMNLKRERGW
>XP_003842584.1 hypothetical protein LEMA_P083440.1 [Plenodomus lingam JN3] | Cytoplasmic effector probability: 0.552
MISSSFLIVALWSASKVIANQLTCPTASSLPRNDVCSGPPEVFIIAHSHGKGLGVFATHDLELGDIVMREAPAIKIEPPRVGKGDPYPMSEISRLVEEQFQHLPTAAQAEIMSLTVHATAVEKKTQSRLALIFRTNAYNTGTGIGLFPKIARINHSCRPNTSYYWSEKLNKRIVFASRKIKKGEEFFVSYIPLLLTRDERQRRLRQYGFECTCDVCAQDQVALQVSDGRRVELRETFLNLESNLSMNPPHSKSGKRQAREKAEAGHRLIELVQEEGLTDYYAKAYRIAAIHYARIEDWENAAIWSNKGYELRFIEDPKSNSTLEMRHLTSMFLESWENQLKQHSST
>XP_003843103.1 hypothetical protein LEMA_P088630.1 [Plenodomus lingam JN3] | Apoplastic effector probability: 0.758
MPSQSILALALAVSTAVAAPSFRGQMIKSREPNGCGPFSGDQPFIADIGFYSDKDCNDKIDYTCVYTYQSVADDDAGAYGCNPGLLPDTTPFWAKVEESPFDEMQIIFTRDQTCPPNGPGAVFATLIDNSNCVEMNLGGEAPGISVYPKGGSGLSRKIDDGLAKRADPKCDGFEVESSTPSSSESVQVSVIVDCVNGSEQGCEISVEKQHSESVTTSYSLSAGGGIEGIFSVEATFGQEFTSESSTSVTTGFSVQQGQKGYLSAYSAATLFKGKFTGCDSGDSEQAGEVLAIKKEGFTYAVVNTGARQLVSA
>XP_003843283.1 similar to chitin binding protein [Plenodomus lingam JN3] | Apoplastic effector probability: 0.652
MHHTALAALAALTPLVHAHGVGLPKIVGLNPRDLKARELLGNLGARFAEPHEFLKAPEQKLQARQDDRRCGAGIGSCAAGECCSEGGYCGTDDDFCYSPGCNYAYGPGCPDNVTPSGTNTSSIARTKVGDVLYGGDGIYNCVKPGTVALTYDDGPQKVFTSHILDVLDSYGAKATFFVTGNNINKGQIDTTPEFVADIKRMDSEGHQIASHTWTHLDLSAVSQLDRKNQMWKNEMAIRNIIGKIPTYMRPPYSSCTGQCETDMADLGYHVIYFDVDTDDYNQDSPAQIQNSKHWFRGNITQNGAKPASSQWLEIGHDIHEQTAMNLTDYMLSTLTQLGYKGVTVGDCLGDPKANWYRVAGGAGSGTGTGTSNPPAGSSTPPRASTAPSSGNHKMTTDAT…
>XP_003843405.1 similar to polygalacturonase 1 [Plenodomus lingam JN3] | Apoplastic effector probability: 0.698
MVALTLGFVATALVASSVAAPAPEIDGAHNAPVTAKRADSCTFTGANGAAEASKASKSCTTMVLDNLAVPAGTTLDLSSLADGTTVIFQGTTTWGYKEWAGPLLSIGGNKITVKGASGSLLNPDGARWWDGKGGNGGKDKPKFFAAHSLTDSTITDVNIKNTPVQAVSIASCDGLTITGMTIDDSEGDANELGHNTDAFDIGTSKNIMIDGAKVHNQDDCVAVNSGTNITFQNGLCSGGHGLSIGSVGGRADNTVDTVTFNNNVVTKSTNGIRVKAKVGATGKINNVVYSKTTLSSISKYGVLVEQNYDGGDLHGTPDTGIPITGLVLSDVKGEGAVAANGFNVVVTCGSETSCTGWKWDNVVITGGSKVYGNCTNVPSVTKCS
>XP_003844031.1 similar to polygalacturonase 1 precursor [Plenodomus lingam JN3] | Apoplastic effector probability: 0.697
MVAIQIASFLFSAGALVSAMPTSLDARGNCTFSDAAALAKGKGSCSSIVIKDMNVPAGTTLDLTKLKSGTTVTFEGATTFGYKEWEGPLISVSGDNIKVNGASGHCINGDGQKWWDGKGSNGGKKKPKFFAAHSMTSSTITGLNIRNTPVQGFSINQCKGLTVDQITIDNSAGNGPNGGHNTDAFDVGSSSDIHITNANVKNQDDCLAVNSGTDIFFSKCTCDGGHGISIGSVGGRSDNVVKNVFITDSTIINSENGVRIKTVAGATGSVSNVTYKNITLKNITKNGIVIRQDYQNGSPTNKPTAGISVTGIHLEDIHGTVASGATNILILCGKGSCSNWTWSNVNVTGGKKSSMCQNVPAVASYALRFDT
>XP_003844882.1 hypothetical protein LEMA_P001900.1 [Plenodomus lingam JN3] | Apoplastic effector probability: 0.819
MRVTSTVLALSSVASSLILPRQASVSNSSTPNVAAAQYDGKCFYPVPDTKFDLEAYLGTWYQVAGTPFGPTAGARCVSANYSLNGNGTVRVVNSATVGSRPIDIIGTATPVDSVYGAGGAFVVNFPGASSMSECPGPNYIVQDYAVEWAIVQTQNWNTLYILCRERQPAPASIDAWIDRAVAFGSDASAIQKFNQTGCDGN
>XP_003845298.1 similar to DnaJ protein [Plenodomus lingam JN3] | Cytoplasmic effector probability: 0.628
MIRRLTLFLLLACLALLVLGAEDYYKLLGLKKDASEREIKKAYRSLSKKYHPDKNPGDDTASKKFVEVAEAYEVLSDKETRKIYDQYGHDGIQQHKQGGGPRQHHDPFDLFSRFFGGSGHFGHHGGERRGPNMEVRVALPLRDFYNGRKTEFTIEKQAICSACEGSGSEDGHVETCDLCGGRGVRIQRQQLAPGLFQQVQMHCDKCGGKGKTIKHPCPICGGSRVVRESETHVLDIEKGMPNGVRITYENEGDESPDWVAGDLIVHLVEQDPALGAEEHERTDGTFFRRRGKDIFWREVLSLREAWMGDWTRNITHLDGHVVQLSRKRGEVVQPNTVEVVKDEGMPIWAQHLDNNEGLQSGDLHVEYVVVLPDMMEKSMEKDFWATWEKYRKKNGVQLD…
>XP_003833937.1 similar to endo-1,4-beta-xylanase [Plenodomus lingam JN3] | Cytoplasmic effector probability: 0.558
MRLSPIVATLALASSAFAYPAQKEDSLYQAMKKAGRKFIGTALTLRNETREGEIIKQEFNAFTPENSMKWESTEPSRDNFTFTDADRYAAYAMKNRLQVHCHTLVWHSQLPAWVSSGGFDNQTLIGIMENHIKQLVTRYKGICTRWDVVNEALEENGTYRKSVWLDTIGEAYLPIAFRLAKKYDNNVDLYYNDYNLEYNSNKTAGAVRIVKLLKSYGVKIDGVGYQAHLGSETTPTAEGPTPDQKTLEAALRATADLGVDVAYTEIDVRMNTPATPAKLQVQAAAYERIAKSCMAVKRCIGMTVWGISDKYSWIPGVFENEGAALVWDENYNKKPAYAGFLKGIRSKKYSPVW
>XP_003833999.1 similar to glycoside hydrolase family 16 [Plenodomus lingam JN3] | Apoplastic effector probability: 0.57
MHFSAASALLLATAVSAVAPIIDLIPSNAFNSKTYLEKYFDYGYPWGTGAAFMDPSHVTIPTPGVLRLTAQPVSGKRPVCHNPKIIINYLSGAVHSKQNFTVTERQGFAVNFKVKAPVVRGTWPAVWLLSAESWPPEVDIAEFKGSGKISMNTYNTSSQVTGVDLAYPDPDEWHSVSCSLMHKTPGKDVEVRFWLNDKVVSTQYAKDYVGKPMRLIINLQMEGSSKSPGPKTDTTFSIKDFTVSTL
>XP_003834160.1 similar to gi|157830726|pdb|1CUA|A Chain A [Plenodomus lingam JN3] | Apoplastic effector probability: 0.546
MKSFAILLFTSLAAASPIAAPEPVAITEPEVVTVTVPEVALDIRQIGGSTRNELETDSTSACPKVIFIMARGSTERGNMGTLTGPPLANGLERIYGANQVWVQGVGGPYTADLGSNALPGGSSPAAFNEGVRLFNLAAKKCPNAAIVAGGYSQGAALIAGAVSRLEPAVRDQVKGVVLFGYTKNKQNGGRIPNYPAERLKVYCAAGDLVCTGTLTITPAYLTYGADAGSDAPKFLQSKIDA
>XP_003834173.1 similar to carbohydrate esterase family 8 protein [Plenodomus lingam JN3] | Cytoplasmic effector probability: 0.666
MHPSLGFILSLAVAAVATPSHPERRTARHSSPDGCLTVGKGGKFHKVQDAVDALDKSNPKSQCIYIAKGKYQEQVTIEKIASPLIIYGETSDTSDYNSNAVTITQGRSQDNFKNENDKTATLRAHTPNLKVYNINLVNTRGAGSQALAVSASGDKQAYYACQLIGYQDTVLAQTGKQLYAKCYIEGATDFIFGEEAFALFHGCTIGVLPKEKGKGHITANGADDESNKSIFVIENSSIAAARDKSVKDGSYTLGRPWGHHARTVFQNCDLSAVINEVGWSTWNDNDPRNDYAFFGEYGNTGKGALGKRPKWVKQLKKPIAITEVLDKDYKSWTDASYLG
>XP_003834176.1 similar to pectate lyase [Plenodomus lingam JN3] | Apoplastic effector probability: 0.627
MHFLYYFPLIASTVTALAFPGAEGFGRNAIGGRNGKVYVVNNLNDSGEGSLRDAVSQPDRIVVFSVGGTIKIKERIVVSKRISILGQTAPGNGITVYGNGWSFSNADDAIVRYIRIRMGKGGTSGKDGVGIAEGSNMIFDHISVSWGRDETFSISGSEVGNITIQNSIIAQGLETHSCGGLIQTNLGNGISLFRNLYIDNKTRNPKVKGTNDFTNNVVYNWGGGGGYIAGDSSAVSEANIVGNYFISGPSTTITAFTRGNANFKGYVDANFYDSDKDGALNGAEIGVASSNYGGLNIQSSKFAFPGPAKTLAPADALKLVETSAGASKVRDAVDKRLIAELQSYGKMGQLISDENAAPMNGPGTIAGGTPWVDANGNGIPDDVESQFSNVEDWANSLVP…
>XP_003834735.1 similar to extracellular exo-polygalacturonase [Plenodomus lingam JN3] | Apoplastic effector probability: 0.554
MRVTEFLTFALLQATAVISTPAKKHVSSSEPSIRPNHAIGPYQPDKPFPVSPARTKTCLVASSGGGKDDSENILKAVKECNNGGHVVFPRNTIFTIGTALDLTFLKNIDLDIQGTIQFTADTDYWQKNAFKQVFQNATTFFQLGGEDVNVYGGGTLDGNGQVWYDLYASDIYTLRPILFGVIGLKGGRIEDLNFRYSPQWYTLVANSSQVLFSNIDIAGGSNSTHEAKNTDGWDTYRSTDIVIQNSHVNNGDDCVSFKPNSTNIIIQNMVCNGSHGMSVGSLGQYANEVDIVENVLVYNVSMSNASDGARIKVWPGASTALSGDLQGGGGSGYVKNITFDGMTVSNVDYAIEITQCYGQKNLTLCHQFPAKLTISDITVKNFKGTTSKKHDPRIGYLMC…
>XP_003834867.1 hypothetical protein LEMA_P070100.1 [Plenodomus lingam JN3] | Apoplastic effector probability: 0.67
MVSFLVASVALLGATASAASVARRQTEIPCGATEFQEVNILTGYNLTYIAQRYQSGICDIANFNGIRNSDFIQAEWIIQVPKCAAGQEDNTSCLGGKGYTGTSIPDPVNPPCQAASVARIQIKRGDTVYGYSQRFQSSICDIKNYNKLQDASRITAGDFISIPVKCQKPAADNTCPTNGRRQTTTPPPCGSSLIVDHVVAANQTLSLIASNYTSGICDIASLNKIQNPNFIQVGQVLRIPTKCTTPDNTSCLPPPNTATAVCINGVGSSYNVRSGETLTIIAGNFNVTLNSVIAANSDIDPNVISPGQLINIPVCPHSCCDWIGTYEIKSGDTFAELARKMHTTVGQIMAVNAKVDPTKLAIKQQIILPANCRT
>XP_003835139.1 similar to chitin deacetylase [Plenodomus lingam JN3] | Apoplastic effector probability: 0.825
MVFKTVLLASLAVMAVAKPIPDPLNVMRQAGPAAGQVITKCNAPGQLALAYDDGPYQYTQKLVDTLNAGGAKGTFFVTGTLYGCIYNQKAALQNAYKAGHQIASHSWSHPSNFGSLSTNDLTTQMTRLEQALVNIIGVKPTYMRPPYLATGGNVLPTMKQLGYRVITNDIDSGDWNNQTPQQSQQKFTQAGAGGNGHIPLMHETYASTVDTLTPWLINWAKSNNLKLVTVAECLGDTSSAYKSGTANGASTC
>XP_003835184.1 similar to transmembrane emp24 domain-containing protein 9 precursor [Plenodomus lingam JN3] | Cytoplasmic effector probability: 0.707
MWKPTVLLAAALAVPAHALHFFMDGPVQKCFYEELPKDTLVVGHYHAEAWDDATKTYQTKASDNVFVTVEETFDNNHRIVAQRGSAKGKFTFSAADGGQHRICVTPQNVPSGGGWLSSGVHGTVRFTLDMAIGETSRIQSADKDKVETLVEKVKDLNSRLQDIRREQVFQREREAEFRDQSEHTNSRVVRWTMIQLVILGVTCAWQLSHLRAFFIKQKLT
