# Supplementary material for: Secretome Analysis for a New Strain of the Blackleg Fungus Plenodomus lingam Reveals Candidate Proteins for Effectors and Virulence Factors
Source: J Fungi (Basel). 2023 Jul 11;9(7):740. doi: 10.3390/jof9070740 (PMC10381368; doi:10.3390/jof9070740)
Supplement: Supplementary file 1 [file jof-09-00740-s001.zip › Table S5.xlsx]

## Sheet: Sheet1
Gene ID	EC#	HMMER	dbCAN_sub	DIAMOND	#ofTools
KAH9860314.1	1.1.3.-	AA7(57-266)	AA7_e0	N	2
KAH9860350.1	3.2.1.145	GH43_24(44-276)	GH43_e150+CBM35_e44	CBM35+GH43_24	3
KAH9860470.1	3.2.1.8|3.2.1.4	GH10(31-177)	GH10_e97	N	2
KAH9860804.1	-	CE5(56-228)	CE5_e58	N	2
KAH9861651.1	3.2.1.-	GH18(21-411)	GH18_e227	CBM18+GH18	3
KAH9861675.1	-	PL4_5(42-554)	PL4_e2	PL4_5	3
KAH9862714.1	3.2.1.14|-	GH18(552-901)+CBM24(917-993)	CBM18_e13+GH18_e72+CBM24_e2	CBM18+CBM24+CBM50+GH18	3
KAH9862737.1	3.2.1.67|3.2.1.-	GH28(80-426)	GH28_e58	GH28	3
KAH9862772.1	-	AA3_2(28-613)	AA3_e59	AA3_2	3
KAH9862876.1	3.2.1.-	GH93(42-352)	GH93_e5	GH93	3
KAH9862920.1	3.5.1.41	CE4(253-383)	CE4_e46	N	2
KAH9862984.1	3.2.1.99	GH43_6(31-318)	GH43_e141	GH43_6	3
KAH9863558.1	-	AA3_2(33-605)	AA3_e19	AA3_2	3
KAH9863575.1	3.2.1.4	GH45(25-114)	GH45_e0	N	2
KAH9863600.1	-	CE5(75-247)	CE5_e58	CE5	3
KAH9863808.1	-	PL3_2(31-215)	PL3_e11	N	2
KAH9863942.1	-	AA3_2(47-673)	AA3_e44	AA3	3
KAH9863945.1	1.1.3.-	AA7(58-277)	AA7_e0	N	2
KAH9863964.1	3.5.1.41	CE4(144-271)	CE4_e46	CBM18+CE4	3
KAH9863984.1	1.1.3.-	AA7(116-342)	AA7_e4	N	2
KAH9864338.1	3.2.1.20|3.2.1.84	GH31(257-781)	GH31_e7	GH31	3
KAH9864401.1	1.10.3.2|1.10.3.-	AA1_3(343-658)	AA1_e46	AA1_3+CBM18	3
KAH9864447.1	3.2.1.58|3.2.1.21|3.2.1.75	GH5_9(89-406)	GH5_e297	GH5_9	3
KAH9864706.1	-	AA3_2(31-598)	AA3_e21	AA3_2	3
KAH9865348.1	3.5.1.41	CE4(142-269)	CE4_e46	CBM18+CE4	3
KAH9865575.1	3.2.1.23|2.4.1.-	GH35(52-383)	GH35_e4	GH35	3
KAH9865827.1	1.10.3.2|1.10.3.-	AA1_3(60-373)	AA1_e46	AA1_3	3
KAH9866012.1	-	CE4(564-678)	CE4_e263	N	2
KAH9866053.1	3.2.1.-	GH5_31(45-324)	GH5_e207	GH5_31	3
KAH9866237.1	3.2.1.-	GH132(150-463)	GH132_e3	GH132	3
KAH9866824.1	-	GH18(192-540)	GH18_e61	CBM18+GH18	3
KAH9868113.1	-	CE5(124-291)	CE5_e45	N	2
KAH9868142.1	3.2.1.14	GH18(43-397)	GH18_e20	GH18	3
KAH9868288.1	-	AA1(62-552)	AA1_e4	AA1	3
KAH9868430.1	-	GH16_1(86-317)	GH16_e40	GH16_1	3
KAH9868559.1	-	AA5_1(320-837)	AA5_e6	AA5+CBM18	3
KAH9868917.1	1.1.3.-	AA7(166-606)	AA7_e0	N	2
KAH9868993.1	-	PL1_2(67-245)	PL1_e17	PL1_2	3
KAH9868995.1	3.1.1.11	CE8(41-306)	CE8_e78	CE8	3
KAH9869000.1	3.2.1.28	GH37(48-625)	GH37_e4	GH37	3
KAH9869001.1	3.1.1.74	CE5(55-232)	CE5_e5	N	2
KAH9869881.1	-	AA3_1(21-552)	AA3_e58	AA3_1	3
KAH9870024.1	-	GH142(32-505)	GH142_e2	GH142	3
KAH9870198.1	-	GH18(175-512)	GH18_e286	CBM18+GH18	3
KAH9870938.1	1.1.3.-	AA7(149-352)	AA7_e0	N	2
KAH9871154.1	3.2.1.22|2.4.1.-	GH27(129-423)	GH27_e14	GH27	3
KAH9871166.1	1.14.99.55	AA13(18-247)+CBM20(292-383)	AA13_e0+CBM20_e25	AA13+CBM20	3
KAH9871167.1	3.2.1.1	GH13_1(59-347)+CBM20(492-581)	GH13_e206+CBM20_e10	CBM20+GH13_1	3
KAH9871192.1	3.2.1.14	GH18(577-925)	CBM50_e1036+CBM18_e13+GH18_e72	CBM18+CBM50+GH18	3
KAH9871717.1	-	AA3_2(24-639)	AA3_e44	AA3	3
KAH9871903.1	3.2.1.15	GH28(58-375)	GH28_e75	GH28	3
KAH9872059.1	3.5.1.41	CE4(145-273)	CE4_e46	CBM18+CE4	3
KAH9872744.1	-	CBM63(243-313)	CBM63_e9	N	2
KAH9872762.1	-	AA3_2(41-616)	AA3_e48	AA3_2	3
KAH9873024.1	-	AA2(48-248)	AA2_e8	N	2
KAH9873046.1	3.2.1.3	GH15(49-455)+CBM20(488-576)	GH15_e31+CBM20_e31	CBM20+GH15	3
KAH9873187.1	3.2.1.21|3.2.1.-	GH3(96-315)	GH3_e16	GH3	3
KAH9873226.1	3.2.1.15	GH28(41-359)	GH28_e75	GH28	3
KAH9873235.1	1.1.3.-	AA7(197-398)	AA7_e4	N	2
KAH9873269.1	1.14.99.56|1.14.99.54	AA9(4-223)	AA9_e20	AA9+CBM1	3
KAH9873287.1	4.2.2.24	PL26(22-912)	PL26_e0	PL26	3
KAH9874866.1	-	AA3_2(60-643)	AA3_e50	AA3_2	3
KAH9874868.1	3.2.1.8|3.2.1.4	GH10(27-341)	GH10_e97	GH10	3
KAH9874957.1	-	GH76(17-327)	GH76_e28	GH76	3
KAH9875107.1	-	GH5_31(77-329)	GH5_e13	GH5	3
KAH9875389.1	-	CE5(40-213)	CE5_e57	N	2
KAH9875443.1	-	AA9(6-211)	AA9_e41	AA9+CBM1	3
KAH9876219.1	3.1.1.11	CE8(36-317)	CE8_e82	CE8	3
KAH9876251.1	3.2.1.91|3.2.1.4	GH6(53-351)	GH6_e20	GH6	3
KAH9876295.1	1.1.3.-	AA7(42-258)	AA7_e0	N	2
KAH9876616.1	-	AA3_2(36-612)	AA3_e21	AA3_2	3
KAH9876722.1	-	AA3_2(28-609)	AA3_e59	AA3_2	3
KAH9877693.1	3.2.1.14	GH18(42-411)	GH18_e20	GH18	3
KAH9877787.1	1.1.3.-	AA7(124-325)	AA7_e0	N	2
KAH9877796.1	-	AA3_2(34-618)	AA3_e59	AA3_2	3
KAH9878034.1	-	AA3_2(37-602)	AA3_e19	AA3_2	3
KAH9878144.1	1.1.3.9|1.1.3.13|1.1.3.-|1.1.3.7|1.1.3.47	AA5_2(279-861)	AA5_e12	AA5_2	3
KAH9879171.1	-	GH16_1(59-292)	GH16_e246	GH16_1	3
KAH9879757.1	-	AA2(105-342)	AA2_e12	AA2	3
KAH9879765.1	3.2.1.22	GH27(145-423)	GH27_e18	GH27	3
KAH9879877.1	3.2.1.14	GH18(134-498)	GH18_e20	GH18	3
KAH9879897.1	-	GH16_1(81-378)	GH16_e246	GH16_1	3
KAH9880010.1	3.2.1.52	GH20(183-552)	GH20_e49	GH20	3
KAH9880170.1	-	GH17(189-441)	GH17_e43	GH17	3
KAH9880193.1	3.2.1.23|2.4.1.-	GH35(52-384)	GH35_e4	GH35	3
KAH9881273.1	1.1.3.-	AA7(60-489)	AA7_e5	AA7	3
KAH9881798.1	1.1.3.-	AA7(157-593)	AA7_e0	N	2
KAH9881893.1	3.2.1.15|3.1.1.11	GH28(40-361)	GH28_e56	GH28	3
KAH9882054.1	3.2.1.8	GH11(47-223)	GH11_e11	GH11	3
KAH9882080.1	3.2.1.14	GH18(27-269)	GH18_e94	N	2
KAH9882217.1	-	AA5(400-911)	AA5_e9	AA5	3
KAH9882303.1	-	GH92(409-760)	GH92_e35	GH92	3
KAH9882431.1	-	GH1(110-582)	GH1_e82	GH1	3
KAH9882453.1	1.1.3.9|1.1.3.13|1.1.3.-|1.1.3.7|1.1.3.47	AA5_2(161-697)	AA5_e12	AA5_2	3
KAH9882529.1	1.1.3.-	AA7(95-309)	AA7_e0	N	2
KAH9882548.1	3.2.1.8	GH10(36-328)	GH10_e64	GH10	3
KAH9882632.1	1.1.99.18	AA8(27-207)+AA3_1(241-785)	AA8_e5+AA3_e46	AA3_1+AA8	3
KAH9882914.1	-	AA7(208-423)	AA7_e3	AA7+CBM18	3
KAH9882915.1	3.5.1.41	CE4(151-280)	CE4_e46	CBM18+CE4	3
KAH9883019.1	3.2.1.91|3.2.1.4	GH6(59-350)	GH6_e20	GH6	3
KAH9883037.1	-	PL1_4(109-294)	PL1_e40	CBM1+PL1_4	3
KAH9883117.1	3.2.1.106|3.2.1.-	GH63(585-796)	GH63_e12	GH63	3
KAH9883182.1	3.2.1.181	GH16_10(40-233)	GH16_e289	N	2
KAH9883183.1	1.1.3.-	AA7(90-517)	AA7_e0	N	2
KAH9863970.1	-	N	GH39_e87	GH39	2
KAH9864501.1	-	N	CBM50_e681	N	1
KAH9861539.1	N	N	N	GH0	1
