# Supplementary material for: Secretome Analysis for a New Strain of the Blackleg Fungus Plenodomus lingam Reveals Candidate Proteins for Effectors and Virulence Factors
Source: J Fungi (Basel). 2023 Jul 11;9(7):740. doi: 10.3390/jof9070740 (PMC10381368; doi:10.3390/jof9070740)
Supplement: Supplementary file 1 [file jof-09-00740-s001.zip › Table S6.xlsx]

## Sheet: Sheet1
Gene ID	EC#	HMMER	dbCAN_sub	DIAMOND	#ofTools
XP_003833488.1	1.1.3.-	AA7(63-499)	AA7_e0	N	2
XP_003833888.1	3.2.1.106|3.2.1.-	GH63(585-796)	GH63_e12	GH63	3
XP_003833934.1	-	AA3_2(60-637)	AA3_e50	AA3_2	3
XP_003833937.1	3.2.1.8|3.2.1.4	GH10(27-341)	GH10_e97	GH10	3
XP_003833956.1	1.1.3.-	AA7(62-250)	AA7_e0	N	2
XP_003833993.1	-	AA2(109-344)	AA2_e12	AA2	3
XP_003833999.1	3.2.1.181	GH16_10(38-229)	GH16_e289	GH16_10	3
XP_003834160.1	3.1.1.74	CE5(61-238)	CE5_e5	CE5	3
XP_003834173.1	3.1.1.11	CE8(41-317)	CE8_e78	CE8	3
XP_003834176.1	-	PL1_2(67-245)	PL1_e17	PL1_2	3
XP_003834304.1	3.2.1.78|3.2.1.151|3.2.1.4	CBM35(22-137)+GH26(153-454)	CBM35_e4+GH26_e7	CBM35+GH26	3
XP_003834533.1	-	AA3_2(24-640)	AA3_e44	AA3	3
XP_003834735.1	3.2.1.67|3.2.1.-	GH28(78-438)	GH28_e58	GH28	3
XP_003834767.1	-	AA3_2(29-614)	AA3_e59	AA3_2	3
XP_003834996.1	1.10.3.2|1.10.3.-	AA1_3(209-525)	AA1_e46	AA1_3+CBM18	3
XP_003835032.1	1.14.99.56|1.14.99.54	AA9(4-223)	AA9_e20	AA9+CBM1	3
XP_003835038.1	-	AA2(31-256)	AA2_e17	N	2
XP_003835056.1	4.2.2.24	PL26(22-912)	PL26_e0	PL26	3
XP_003835139.1	-	CE4(44-167)	CE4_e294	CE4	3
XP_003835154.1	1.1.3.-	AA7(57-488)	AA7_e5	AA7	3
XP_003835390.1	3.2.1.91|3.2.1.4	GH6(52-351)	GH6_e20	GH6	3
XP_003835434.1	3.1.1.11	CE8(36-317)	CE8_e82	CE8	3
XP_003835694.1	3.2.1.21|3.2.1.37	GH3(89-303)	GH3_e32	GH3	3
XP_003835927.1	1.1.3.-	AA7(136-342)	AA7_e0	N	2
XP_003835940.1	3.2.1.23|2.4.1.-	GH35(52-383)	GH35_e4	GH35	3
XP_003836225.1	1.10.3.2|1.10.3.-	AA1_3(74-363)	AA1_e46	AA1_3	3
XP_003836322.1	1.1.3.-	AA7(57-494)	AA7_e5	AA7	3
XP_003836852.1	-	CE5(40-213)	CE5_e57	CE5	3
XP_003836885.1	3.1.1.72	CE5(23-225)	CE5_e24	CE5	3
XP_003836911.1	-	AA9(6-211)	AA9_e41	AA9+CBM1	3
XP_003837356.1	3.2.1.8	GH11(47-223)	GH11_e11	GH11	3
XP_003837384.1	3.2.1.14	GH18(27-308)	GH18_e94	GH18	3
XP_003837532.1	-	AA5(404-911)	AA5_e9	AA5	3
XP_003837565.1	1.1.3.-	AA7(59-277)	AA7_e0	N	2
XP_003837631.1	-	AA3_1(16-549)	AA3_e58	AA3_1	3
XP_003837909.1	-	GH16_1(84-315)	GH16_e40	GH16_1	3
XP_003838325.1	3.2.1.21	GH3(87-298)	GH3_e180	GH3	3
XP_003838378.1	-	AA5_1(307-658)	CBM18_e26+AA5_e6	AA5+CBM18	3
XP_003838381.1	-	CE5(132-299)	CE5_e45	CE5	3
XP_003838546.1	-	AA1(60-550)	AA1_e4	AA1	3
XP_003838869.1	-	GH18(185-534)	GH18_e61	CBM18+GH18	3
XP_003838953.1	-	GH16_1(60-292)	GH16_e246	GH16_1	3
XP_003839895.1	3.2.1.14	GH18(39-406)	GH18_e20	GH18	3
XP_003839998.1	-	AA3_2(34-618)	AA3_e59	AA3_2	3
XP_003840412.1	-	AA7(204-417)	AA7_e3	AA7+CBM18	3
XP_003840451.1	-	AA2(66-204)	AA2_e17	N	2
XP_003840518.1	3.2.1.91|3.2.1.4	GH6(70-359)	GH6_e20	GH6	3
XP_003840536.1	-	PL1_4(109-294)	PL1_e40	CBM1+PL1_4	3
XP_003841026.1	3.2.1.4	GH45(25-224)	GH45_e0	GH45	3
XP_003841054.1	-	CE5(75-247)	CE5_e58	CE5	3
XP_003841129.1	3.2.1.8	GH10(155-449)	GH10_e64	CBM1+GH10	3
XP_003841433.1	-	AA3_2(44-669)	AA3_e44	AA3	3
XP_003841435.1	1.1.3.-	AA7(60-271)	AA7_e0	N	2
XP_003841449.1	3.5.1.41	CE4(143-270)	CE4_e46	CBM18+CE4	3
XP_003841468.1	3.2.1.23|2.4.1.-	GH35(52-384)	GH35_e4	GH35	3
XP_003841733.1	1.14.99.56	AA9(10-221)	AA9_e2	AA9+CBM1	3
XP_003841789.1	-	GH16_1(82-359)	GH16_e246	GH16_1	3
XP_003841960.1	3.2.1.22	GH27(145-422)	GH27_e18	GH27	3
XP_003841989.1	-	CE5(72-245)	CE5_e58	CE5	3
XP_003842406.1	3.2.1.22	GH27(130-411)	GH27_e18	GH27	3
XP_003842464.1	3.2.1.25|3.2.1.22|3.2.1.88	GH27(124-370)+GH2(619-1302)	GH27_e5+CBM35_e6+GH2_e138	CBM35+GH2+GH27	3
XP_003842511.1	3.2.1.1	GH13_1(59-347)+CBM20(488-578)	GH13_e206+CBM20_e10	CBM20+GH13_1	3
XP_003842958.1	3.2.1.25|-	GH152(58-338)+GH2(470-1186)	GH152_e10+GH2_e138	GH152+GH2	3
XP_003843283.1	3.5.1.41	CE4(143-271)	CE4_e46	CBM18+CE4	3
XP_003843404.1	-	AA7(146-327)	AA7_e3	N	2
XP_003843405.1	3.2.1.15	GH28(55-383)	GH28_e75	GH28	3
XP_003843673.1	1.1.99.18	AA8(27-207)+AA3_1(241-785)	AA8_e5+AA3_e46	AA3_1+AA8	3
XP_003843711.1	1.1.3.9|1.1.3.13|1.1.3.-|1.1.3.7|1.1.3.47	AA5_2(170-714)	AA5_e12	AA5_2	3
XP_003843876.1	-	AA3_2(36-602)	AA3_e59	AA3_2	3
XP_003844031.1	3.2.1.15	GH28(41-360)	GH28_e75	GH28	3
XP_003844197.1	3.2.1.3	GH15(61-474)+CBM20(507-596)	GH15_e31+CBM20_e31	CBM20+GH15	3
XP_003844219.1	-	AA2(60-246)	AA2_e8	N	2
XP_003844271.1	3.2.1.91|3.2.1.4	GH6(63-357)	GH6_e20	GH6	3
XP_003844414.1	1.1.3.9|1.1.3.13|1.1.3.-|1.1.3.7|1.1.3.47	AA5_2(193-631)	AA5_e12	AA5_2+CBM32	3
XP_003844493.1	-	GH105(57-409)	GH105_e4	GH105	3
XP_003844506.1	-	CBM63(291-362)	CBM63_e9	CBM63	3
XP_003844946.1	-	AA3_2(44-619)	AA3_e19	AA3_2	3
XP_003844981.1	3.2.1.20|3.2.1.84	GH31(381-827)	GH31_e39	GH31	3
XP_003844992.1	-	GH92(257-763)	GH92_e35	GH92	3
XP_003845057.1	3.2.1.39	GH16_3(30-292)	GH16_e303	GH16_3	3
XP_003845062.1	3.2.1.8	GH10(38-334)	GH10_e64	GH10	3
XP_003845147.1	-	GH1(115-587)	GH1_e82	GH1	3
XP_003845597.1	-	PL4_5(42-556)	PL4_e2	PL4_5	3
XP_003834867.1	-	N	CBM50_e799	CBM50	2
XP_003842497.1	-	N	GH39_e87	GH39	2
XP_003836344.1	N	N	N	CBM18	1
XP_003836618.1	N	N	N	CBM18	1
XP_003837386.1	N	N	N	GH5_12	1
XP_003838867.1	N	N	N	CBM50	1
XP_003842608.1	N	N	N	CBM18	1
XP_003845748.1	N	N	N	GH0	1
