# Supplementary material for: Secretome Analysis for a New Strain of the Blackleg Fungus Plenodomus lingam Reveals Candidate Proteins for Effectors and Virulence Factors
Source: J Fungi (Basel). 2023 Jul 11;9(7):740. doi: 10.3390/jof9070740 (PMC10381368; doi:10.3390/jof9070740)
Supplement: Supplementary file 1 [file jof-09-00740-s001.zip › Table S7.xlsx]

## Sheet: Sheet1
Protein ID	PHI ID	Phtopathogen name	PHI annotation	Gene
KAH9881423.1	PHI:10423	Metarhizium robertsii	reduced virulence	Kmt2
KAH9881503.1	PHI:10461	Aspergillus fumigatus	reduced virulence	fmqA
KAH9880351.1	PHI:5599	magnaporthe oryzae	unaffected pathogenicity	FZc10
KAH9880478.1	PHI:9191	Fusarium verticillioides	reduced virulence	Fvset2
KAH9880542.1	PHI:2138	Magnaporthe oryzae	unaffected pathogenicity-loss of pathogenicty	SGA1-ATG8
KAH9880554.1	PHI:6391	Magnaporthe oryzae	unaffected pathogenicity	CDA2
KAH9879448.1	PHI:652	Phytophthora sojae	effector (plant avirulence determinant)	GIP1
KAH9876765.1	PHI:6228	Colletotrichum graminicola	reduced virulence	KRE6
KAH9876928.1	PHI:1028	Botrytis cinerea	unaffectedpathogenicity - reduced virulence	bcpme2-bcpme1
KAH9876931.1	PHI:1034	Claviceps purpurea	unaffected pathogenicity	Ku70
KAH9876991.1	PHI:9553	Magnaporthe oryzae	unaffected pathogenicity	Moarf1
KAH9877485.1	PHI:2817	Alternaria alternata	unaffected pathogenicity	Aapg1
KAH9877596.1	PHI:6391	magnaporthe oryzae	unaffected pathogenicity	CDA2
KAH9874320.1	PHI:8520	Verticillium dahliae	reduced virulence-unaffected pathogenicity	PevD1
KAH9874600.1	PHI:571	Bipolaris zeicola	unaffected pathogenicity	XYL2
KAH9875744.1	PHI:180	Fusarium solani	reduced virulence	PELA-PELD
KAH9875764.1	PHI:2044	Magnaporthe oryzae	loss of pathogenicity	MoCDTF1
KAH9875892.1	PHI:10926	Beauveria bassiana	reduced virulence	HapX
KAH9873589.1	PHI:6832	Verticillium dahliae	effector (plant avirulence determinant)	Vd5LysM
KAH9873703.1	PHI:9867	Ustilago maydis	reduced virulence-unaffected pathogenicity	Pdi
KAH9873874.1	PHI:10459	magnaporthe oryzae	reduced virulence	Gtb1
KAH9874050.1	PHI:3214	magnaporthe oryzae	unaffected pathogenicity	MoCDIP2
KAH9872236.1	PHI:9546	Beauveria baasiana	reduced virulence	BbepnL-1
KAH9872288.1	0	0	0	0
KAH9870266.1	PHI:6823	Candida albicans	reduced virulence	zcf29
KAH9871448.1	PHI:9867	Ustilago maydis	reduced virulence-unaffected pathogenicity	pdi
KAH9869412.1	PHI:3440	Peseudomonas	reduced virulence	CbrA
KAH9869498.1	PHI:9903	Botrytis cinera	reduced virulence	Bcser1
KAH9869606.1	PHI:8208	Colletotrichum graminicola	reduced virulence	BAS2
KAH9867862.1	PHI:401	Candida albicans	unaffected pathogenicity	SOD2
KAH9868053.1	PHI:1380	Fusarium graminearum	unaffected pathogenicity	GzC2H043
KAH9868081.1	PHI:2210	Magnaporthe oryzae	reduced virulence	Jmjc domain
KAH9867052.1	PHI:653	Phytophthora sojae	effector (plant avirulence determinant)	GIP2
KAH9867270.1	PHI:2383	Monilia fruticola	hypervirulence (increased virulence)	MfCUT1
KAH9867337.1	PHI:6834	verticillium dahliae	effector (plant avirulence determinant)	Vd2LysM
KAH9864751.1	PHI:197	Candida albicans	reduced virulence	ALO1
KAH9865909.1	PHI:10459	Magnaporthe oryzae	reduced virulence	Gtb1
KAH9864831.1	PHI:4231	Magnaporthe oryzae	reduced virulence	MoFLP1
KAH9865021.1	PHI:3972	Colletotrichum	unaffected pathogenicity	CDA2
KAH9865263.1	PHI:2383	Monilia fruticola	hypervirulence (increased virulence)	MfCUT1
KAH9861880.1	PHI:5236	fusarium oxysporum	reduced virulence	Dnj1
KAH9861890.1	PHI:1008	Bipolaris oryzae	reduced virulence	NPS6
KAH9861931.1	PHI:9867	Ustilago maydis	reduced virulence	Pdi
KAH9862482.1	PHI:181	Candida albicans	reduced virulence	PGX1
KAH9860991.1	PHI:3503	Candida albicans	reduced virulence	Cas5
KAH9861149.1	PHI:1087	Fusarium graminearum	unaffected pathogenicity	FGSG_04510
KAH9861329.1	PHI:11528	Puccinia striiformis	reduced virulence	Pst_13661
KAH9862149.1	PHI:10358	Magnaporthe oryzae	reduced virulence	MoAa91
KAH9859690.1	PHI:7283	Fusarium graminearum	reduced virulence	xyr1-Pg1
